# Supplementary material for: Pseudomonas aeruginosa and Staphylococcus aureus Display Differential Proteomic Responses to the Silver(I) Compound, SBC3
Source: MDPI journal article supplement (doi:10.3390/antibiotics12020348), 2023-02-08
Supplement: s1 [file s1]

Supplementary dataset S1A. All identified proteins in *P. aeruginosa* treated with SBCL. All LFQ intensity replicates (rep.) are Log<sub>2</sub> transformed.

| Protein name | Majority protein IDs | Gene name | Peptides | Sequence     | Mol.         | Score  | Intensity | MS/MS count | Sequence length | LFQ Intensity Control Rep. 1 | LFQ Intensity Control Rep. 2 | LFQ Intensity Control Rep. 3 | LFQ Intensity Control Rep. 4 | LFQ Intensity         | LFQ Intensity         | LFQ Intensity         | LFQ Intensity         |
|--------------|----------------------|-----------|----------|--------------|--------------|--------|-----------|-------------|-----------------|------------------------------|------------------------------|------------------------------|------------------------------|-----------------------|-----------------------|-----------------------|-----------------------|
|              |                      |           |          | coverage [%] | weight [kDa] |        |           |             |                 |                              |                              |                              |                              | SBCL Treatment Rep. 1 | SBCL Treatment Rep. 2 | SBCL Treatment Rep. 3 | SBCL Treatment Rep. 4 |
| criptional   | G3XCW2               | argR      | 8        | 41.6         | 36.854       | 34.972 | 4.92E+08  | 33          | 329             | 24.4782                      | 23.9872                      | 24.2421                      | 24.4411                      | 25.0127               | 25.1283               | 25.0573               | 25.0181               |
|              | G3XCW5               | PA3031    | 2        | 35.6         | 8.0121       | 51.455 | 1.49E+09  | 13          | 73              | 23.1055                      | 23.5233                      | 22.6161                      | 23.0348                      | 28.4729               | 27.8122               | 27.732                | 27.6955               |
|              | G3XCW6               | dmr       | 6        | 51.5         | 25.933       | 23.346 | 7.46E+08  | 20          | 227             | 25.6663                      | 25.6685                      | 25.5712                      | 25.8873                      | 24.1528               | 24.2318               | 22.9706               | 24.1863               |
|              | G3XCW7               | PA1462    | 5        | 26           | 28.4007      | 16.822 | 5.92E+08  | 35          | 262             | 25.0408                      | 25.2075                      | 25.6259                      | 25.3799                      | 24.5644               | 24.6521               | 24.3574               | 24.6538               |
|              | G3XCX1               | narG      | 54       | 63.1         | 140.97       | 323.31 | 4.97E+10  | 446         | 1261            | 29.4995                      | 29.5339                      | 29.3235                      | 29.4725                      | 28.0877               | 27.7781               | 28.1243               | 27.8589               |
|              | G3XCX2               | PA0624    | 5        | 66.7         | 12.523       | 78.617 | 9.68E+08  | 31          | 114             | 26.429                       | 25.6516                      | 25.1881                      | 26.7667                      | 23.8771               | 25.34                 | 23.6904               | 23.332                |
|              | G3XCX3               | pilU      | 14       | 52.9         | 42.532       | 79.43  | 8.69E+08  | 61          | 382             | 25.3424                      | 25.3163                      | 25.4802                      | 25.0723                      | 24.4442               | 24.4228               | 24.2897               | 24.7844               |
|              | G3XCX5               | PA0618    | 4        | 22           | 31.958       | 18.797 | 3.15E+08  | 15          | 295             | 24.9256                      | 24.9544                      | 24.9527                      | 24.949                       | 23.5302               | 22.8535               | 23.2724               | 22.1102               |
|              | G3XCY4               | amrZ      | 5        | 64.8         | 12.333       | 87.246 | 4.43E+09  | 34          | 108             | 24.6446                      | 24.5881                      | 23.5459                      | 25.0051                      | 27.981                | 27.851                | 28.595                | 27.7735               |
|              | G3XCY9               | narJ      | 14       | 56.1         | 27.261       | 144.21 | 6.31E+09  | 93          | 246             | 28.1544                      | 28.0031                      | 28.046                       | 28.3921                      | 27.3179               | 27.1032               | 27.1534               | 26.8216               |
|              | G3XCZ4               | PA0891    | 10       | 38.4         | 40.213       | 69.913 | 2.64E+09  | 59          | 370             | 26.0254                      | 26.1787                      | 25.3147                      | 26.1006                      | 26.9901               | 27.0574               | 26.9008               | 27.0284               |
|              | G3XCZ8               | hemO      | 8        | 50           | 21.953       | 113.58 | 5.25E+09  | 69          | 198             | 26.2842                      | 26.2507                      | 25.3007                      | 26.4529                      | 27.873                | 27.585                | 29.4201               | 27.6895               |
|              | G3XD16               | PA2523    | 7        | 40.2         | 25.788       | 47.514 | 1.01E+09  | 30          | 224             | 23.3823                      | 23.5233                      | 22.5262                      | 23.6139                      | 26.8558               | 26.5833               | 26.1642               | 26.4485               |
|              | G3XD20               | mucD      | 22       | 58           | 50.321       | 316.56 | 4.7E+10   | 250         | 474             | 30.0562                      | 29.8667                      | 29.4574                      | 29.8807                      | 30.3772               | 30.7019               | 30.575                | 30.4108               |
|              | G3XD25               | mexC      | 22       | 69           | 40.838       | 323.31 | 3.34E+10  | 192         | 387             | 28.1596                      | 28.5207                      | 27.7099                      | 28.5525                      | 29.3157               | 28.8959               | 29.0788               | 29.2924               |
|              | G3XD28               | pilM      | 13       | 47.7         | 37.983       | 77.92  | 2.28E+09  | 61          | 354             | 26.121                       | 26.425                       | 26.6144                      | 26.1469                      | 24.9251               | 24.8425               | 24.9719               | 24.9719               |
|              | G3XD39               | PA0622    | 14       | 58.5         | 41.209       | 165.49 | 2.14E+09  | 71          | 386             | 26.4523                      | 26.5818                      | 26.8572                      | 26.2553                      | 24.9802               | 24.8618               | 25.1235               | 25.0534               |
|              | G3XD40               | PA3925    | 18       | 73.4         | 40.553       | 314.09 | 1.36E+10  | 196         | 391             | 28.4477                      | 28.6217                      | 28.6235                      | 28.4528                      | 27.7818               | 27.8053               | 27.8256               | 27.6786               |
|              | G3XD49               | pcrV      | 6        | 34.7         | 32.283       | 37.315 | 4.43E+08  | 27          | 294             | 25.1918                      | 25.5583                      | 24.7379                      | 25.2936                      | 21.9624               | 22.4288               | 22.4284               | 23.193                |
|              | G3XD80               | PA0510    | 11       | 67.7         | 29.654       | 130.14 | 3.36E+09  | 61          | 279             | 27.579                       | 27.9327                      | 27.6788                      | 27.7741                      | 23.9121               | 24.6441               | 23.7583               | 24.4602               |
|              | G3XD87               | narH      | 36       | 78.8         | 58.105       | 323.31 | 2.67E+10  | 327         | 513             | 29.8729                      | 29.8322                      | 29.6535                      | 29.7883                      | 28.6742               | 28.3753               | 28.5599               | 28.3677               |
|              | G3XD93               | PA3842    | 2        | 22.4         | 13.157       | 21.718 | 1.01E+09  | 19          | 116             | 26.887                       | 25.8216                      | 25.0273                      | 27.1923                      | 22.1913               | 24.9836               | 23.7427               | 24.8584               |
| -binding pr  | G3XDA1               | exoS      | 11       | 45           | 48.302       | 94.738 | 7.93E+08  | 30          | 453             | 25.8296                      | 26.1813                      | 26.1473                      | 25.9096                      | 23.2925               | 23.0381               | 22.5173               | 23.4628               |
|              | G3XDA8               | pstS      | 16       | 72.8         | 34.473       | 201.98 | 6.94E+09  | 118         | 323             | 26.9568                      | 27.2493                      | 25.5384                      | 26.9009                      | 28.0384               | 27.8171               | 27.6466               | 27.3905               |
|              | moyltransf           | PA0830    | arcB     | 23           | 76.8         | 38.108 | 308.42    | 3.06E+11    | 541             | 336                          | 32.8033                      | 32.9313                      | 33.1026                      | 32.6848               | 30.7432               | 30.4517               | 30.9536               |
|              | rhatic amid          | P11436    | amiE     | 10           | 39.3         | 38.494 | 96.328    | 7.11E+08    | 43              | 346                          | 25.0269                      | 25.8158                      | 24.8594                      | 25.1212               | 23.5386               | 23.1654               | 22.9587               |
|              | nembrane             | P13794    | oprF     | 14           | 51.7         | 37.639 | 173.46    | 1.8E+10     | 110             | 350                          | 29.3568                      | 29.6381                      | 28.9615                      | 29.6052               | 30.5408               | 29.9771               | 30.1766               |
|              | nine delimi          | P13981    | arcA     | 39           | 76.6         | 46.435 | 323.31    | 5.03E+11    | 822             | 418                          | 33.4859                      | 33.5383                      | 33.8176                      | 33.3219               | 31.5189               | 31.2599               | 31.5316               |
|              | bamate rict          | P13982    | arcC     | 19           | 53.9         | 33.08  | 274.55    | 1.46E+11    | 219             | 310                          | 32.5664                      | 32.5131                      | 32.4283                      | 32.5525               | 30.0217               | 29.7994               | 30.1004               |
|              | rate synth           | P14165    | gluA     | 20           | 73.6         | 47.694 | 165.6     | 1.6E+10     | 192             | 428                          | 27.9801                      | 28.3086                      | 27.4605                      | 28.2249               | 28.7898               | 28.7139               | 28.6467               |
|              | me c551 p            | P14532    | ccpA     | 16           | 66.5         | 37.403 | 160.22    | 2.63E+10    | 140             | 346                          | 30.4261                      | 30.4968                      | 30.6641                      | 28.1208               | 27.545                | 27.7689               | 28.894                |
|              | ynthase c            | P20580    | trpE     | 13           | 38.8         | 54.555 | 82.417    | 1.06E+09    | 51              | 492                          | 24.4884                      | 24.8932                      | 24.3344                      | 24.345                | 25.1847               | 25.105                | 25.2081               |
|              | threonine            | P21175    | braC     | 24           | 75.6         | 39.769 | 323.31    | 1.02E+11    | 352             | 373                          | 31.3977                      | 31.5576                      | 31.446                       | 31.3515               | 30.5926               | 30.4749               | 30.5973               |
|              | no acid tra          | P21630    | braG     | 8            | 50.2         | 25.591 | 114.74    | 2.13E+09    | 60              | 233                          | 26.1586                      | 26.3874                      | 26.457                       | 25.9404               | 25.769                | 25.7321               | 25.5847               |
|              | nscriptio            | P23747    | algB     | 17           | 55.9         | 49.323 | 123.37    | 2.56E+09    | 67              | 449                          | 25.5894                      | 25.4173                      | 25.6267                      | 25.3316               | 25.8544               | 26.1115               | 26.4832               |
|              | sal activato         | P23926    | anr      | 9            | 38.1         | 27.129 | 66.696    | 2.75E+09    | 55              | 244                          | 25.7994                      | 25.8534                      | 25.4536                      | 25.8993               | 26.7929               | 26.7834               | 26.4895               |
|              | rite reduct          | P24474    | nirS     | 37           | 69.4         | 62.653 | 323.31    | 6.75E+10    | 345             | 568                          | 30.3261                      | 30.6356                      | 30.9052                      | 30.2525               | 28.1113               | 27.8898               | 27.9244               |
|              | utase/pho            | P26276    | algC     | 24           | 57.7         | 50.295 | 277.26    | 1.06E+10    | 149             | 463                          | 26.6574                      | 26.7222                      | 26.7898                      | 26.4761               | 27.377                | 27.4641               | 27.8933               |
|              | expression           | P27017    | amiC     | 10           | 48.6         | 42.807 | 41.431    | 6.55E+08    | 39              | 385                          | 24.9835                      | 25.0084                      | 25.8822                      | 25.038                | 24.0599               | 23.6342               | 22.4504               |
|              | rase sigm            | P29248    | flia     | 10           | 58.7         | 27.522 | 90.733    | 5.76E+09    | 58              | 247                          | 28.9885                      | 28.8869                      | 28.7077                      | 29.0571               | 28.4917               | 28.1286               | 28.3967               |
|              | rotein assi          | P33641    | bamD     | 8            | 39.6         | 38.615 | 35.046    | 6.27E+08    | 34              | 341                          | 23.7194                      | 24.0123                      | 23.6651                      | 24.2278               | 24.9889               | 24.4951               | 24.766                |
|              | sembly pr            | P34750    | pilQ     | 23           | 40.1         | 77.378 | 166.32    | 3.72E+09    | 119             | 714                          | 25.3122                      | 25.5456                      | 25.6516                      | 25.3905               | 26.331                | 26.1814               | 26.0384               |
|              | negative r           | P38107    | mucA     | 10           | 72.7         | 20.998 | 185.91    | 2.7E+09     | 44              | 194                          | 26.2144                      | 26.6911                      | 26.315                       | 26.3613               | 27.4027               | 27.1538               | 27.4087               |
| U regulato   | P38108               | mucB      | 18       | 68           | 34.572       | 205.27 | 9.88E+09  | 141         | 316             | 26.9278                      | 27.2521                      | 27.1819                      | 26.971                       | 27.6053               | 27.543                | 27.9458               | 27.6014               |
|              | 9nine-4-hy           | P43334    | phhA     | 8            | 48.5         | 30.321 | 63.31     | 2.14E+09    | 26              | 262                          | 28.3761                      | 28.1881                      | 28.2642                      | 28.0336               | 22.4816               | 26.8129               | 26.4059               |
|              | arbinolami           | P43335    | phhB     | 6            | 72           | 13.333 | 42.524    | 4.11E+09    | 31              | 118                          | 28.5257                      | 29.0924                      | 28.2425                      | 28.3037               | 28.2444               | 27.8783               | 27.3826               |
|              | hydrogena            | P43904    | aroE     | 12           | 52.6         | 29.484 | 67.534    | 3.11E+09    | 80              | 274                          | 26.5338                      | 26.8918                      | 26.8248                      | 26.733                | 26.0328               | 26.0297               | 26.049                |
|              | rase sigm            | P45684    | rpoS     | 11           | 44.9         | 38.235 | 155.27    | 4.1E+09     | 62              | 334                          | 28.0109                      | 27.5324                      | 27.9635                      | 27.5114               | 26.4787               | 26.057                | 26.3306               |
|              | 'rotein tol          | P50598    | tolQ     | 6            | 28.6         | 25.282 | 46.68     | 8.96E+08    | 30              | 231                          | 24.9604                      | 25.257                       | 24.2009                      | 25.0595               | 25.9864               | 25.5887               | 25.7608               |
|              | sistance pi          | P52002    | mexB     | 12           | 20.9         | 112.79 | 44.063    | 5.61E+08    | 38              | 1046                         | 23.2363                      | 23.7424                      | 23.2549                      | 23.9439               | 25.149                | 24.5582               | 24.2152               |
|              | sistance pi          | P52477    | mexA     | 13           | 57.2         | 40.969 | 114.1     | 1.73E+09    | 61              | 383                          | 25.1057                      | 25.7881                      | 24.732                       | 26.478                | 26.7456               | 26.2721               | 26.2597               |
|              | copropor             | P77915    | hemN     | 14           | 43           | 52.488 | 167.68    | 6.13E+09    | 73              | 460                          | 28.1824                      | 28.2765                      | 28.4006                      | 28.2575               | 25.8727               | 26.3863               | 26.0379               |
|              | 'rotein NirI         | P95412    | nirD     | 5            | 44           | 17.017 | 42.699    | 9.85E+08    | 24              | 150                          | 26.683                       | 26.3108                      | 26.3935                      | 23.0064               | 24.2535               | 23.2835               | 23.7359               |
|              | 'rotein NirI         | P95413    | nirL     | 9            | 46           | 20.21  | 35.761    | 4.37E+08    | 14              | 174                          | 24.7589                      | 25.2969                      | 25.2045                      | 25.0244               | 22.567                | 22.1425               | 22.7266               |
|              | 'rotein NirI         | P95414    | nirG     | 3            | 44.2         | 16.552 | 34.307    | 4.83E+08    | 15              | 147                          | 26.1544                      | 25.7946                      | 25.5114                      | 26.6424               | 22.7731               | 23.2698               | 22.9172               |
|              | Pycoc-S2             | Q06584    | pys2     | 4            | 9            | 73.853 | 16.727    | 1.88E+08    | 15              | 689                          | 24.5943                      | 23.1314                      | 24.9.                        |                       |                       |                       |                       |

|              |                     |        |      |      |        |        |          |          |      |         |         |         |         |         |         |         |         |         |
|--------------|---------------------|--------|------|------|--------|--------|----------|----------|------|---------|---------|---------|---------|---------|---------|---------|---------|---------|
| phosphate    | Q9HV44              | yedY   | 7    | 33.2 | 38.143 | 51.796 | 9.19E+08 | 41       | 337  | 25.0802 | 25.2492 | 25.1381 | 25.5712 | 24.901  | 24.6113 | 24.8036 | 24.1052 |         |
|              | Q9HV72              | PA4639 | 4    | 27.2 | 20.735 | 23.295 | 3.92E+08 | 21       | 195  | 23.9675 | 23.1625 | 23.175  | 24.36   | 25.5696 | 24.8238 | 25.0118 | 25.0974 |         |
|              | Q9HV15              | PA4616 | 15   | 63.6 | 36.959 | 152.59 | 7.14E+09 | 111      | 332  | 27.7769 | 27.8188 | 28.1983 | 27.893  | 26.4865 | 26.3306 | 25.9092 | 26.5362 |         |
|              | Q9HV11              | PA4608 | 4    | 47.2 | 14.573 | 50.619 | 6.5E+08  | 24       | 125  | 26.0701 | 25.9494 | 26.0349 | 25.9781 | 25.0775 | 24.6173 | 24.8431 | 25.1141 |         |
|              | Q9HV12              | PA4607 | 4    | 42.3 | 17.477 | 66.583 | 5.38E+08 | 22       | 168  | 25.4526 | 25.4115 | 24.8706 | 23.689  | 23.7722 | 22.8955 | 23.4088 | 22.0207 |         |
| cine-tRNA    | Q9HV19              | mexD   | 16   | 28.6 | 111.59 | 230.42 | 7.46E+09 | 131      | 1043 | 26.5831 | 26.9002 | 25.9792 | 27.088  | 27.7399 | 27.3903 | 27.2303 | 27.6865 |         |
|              | Q9HVK6              | PA4578 | 6    | 44.4 | 16.893 | 91.051 | 5E+09    | 38       | 162  | 23.3343 | 23.1915 | 23.0916 | 22.9586 | 28.7662 | 28.7744 | 29.2302 | 28.6787 |         |
|              | Q9HVK7              | PA4577 | 4    | 57.4 | 11.756 | 70.168 | 2.93E+09 | 39       | 108  | 28.5134 | 25.5279 | 25.4914 | 28.0664 | 22.9989 | 25.3154 | 22.8031 | 24.3325 |         |
|              | Q9HV13              | PA4571 | 14   | 39.6 | 73.386 | 45.992 | 6.23E+08 | 41       | 675  | 24.6132 | 25.285  | 24.2872 | 25.6627 | 23.6706 | 23.3006 | 22.9833 | 22.7887 |         |
|              | Q9HVM4              | ileS   | 35   | 58.3 | 105.46 | 262.62 | 8.19E+09 | 226      | 943  | 25.7561 | 26.1493 | 25.1815 | 26.2658 | 26.8605 | 26.506  | 26.2306 | 26.652  |         |
| biogenesis   | Q9HVM8              | pilY1  | 24   | 32.6 | 126.58 | 291.12 | 7.79E+09 | 156      | 1161 | 27.1585 | 27.3474 | 27.3359 | 27.1689 | 26.5154 | 26.3342 | 26.3179 | 26.3653 |         |
|              | ae hydroxy          | Q9HVQ7 | piuC | 5    | 31.9   | 25.616 | 27.207   | 4.71E+08 | 19   | 226     | 24.1019 | 24.3422 | 24.2364 | 23.8382 | 24.6297 | 24.7319 | 25.2261 | 24.9688 |
|              | Q9HVR9              | PA4502 | 24   | 70.8 | 58.611 | 179.66 | 5.53E+09 | 143      | 531  | 27.0886 | 27.267  | 27.8567 | 26.863  | 25.1323 | 24.8768 | 25.0339 | 25.3083 |         |
|              | Q9HV51              | PA4500 | 19   | 41.8 | 59.674 | 81.963 | 1.23E+09 | 35       | 533  | 25.1736 | 26.216  | 27.5829 | 25.2356 | 23.399  | 24.0608 | 23.3171 | 23.266  |         |
|              | Q9HV54              | PA4497 | 11   | 44.9 | 59.496 | 80.469 | 5.61E+08 | 26       | 532  | 24.5777 | 25.1714 | 25.6225 | 24.4129 | 23.7611 | 23.0039 | 23.4027 | 23.5654 |         |
| 32 protein i | Q9HV55              | PA4496 | 20   | 52.3 | 60.076 | 176.08 | 4.14E+09 | 85       | 537  | 27.1009 | 27.3372 | 28.3758 | 27.2183 | 24.9198 | 23.986  | 23.8125 | 23.6914 |         |
|              | Q9HV72              | PA4489 | 25   | 29.9 | 167.43 | 116.32 | 1.48E+09 | 63       | 1516 | 24.9943 | 25.6206 | 25.7982 | 25.2025 | 26.0125 | 26.3195 | 26.8083 | 26.4219 |         |
|              | Q9HV55              | PA4463 | 8    | 67.6 | 11.739 | 153    | 8.54E+10 | 153      | 102  | 32.8816 | 32.4484 | 31.8925 | 32.9059 | 31.2211 | 30.9832 | 30.8793 | 31.2433 |         |
|              | Q9HVY4              | PA4431 | 9    | 69.5 | 20.828 | 67.609 | 1.35E+10 | 88       | 197  | 28.1194 | 27.734  | 26.4863 | 28.2692 | 28.9331 | 29.2243 | 28.306  | 29.3582 |         |
|              | Q9HVY5              | PA4401 | 6    | 37.4 | 23.789 | 16.234 | 5.5E+08  | 44       | 191  | 25.1104 | 25.0084 | 25.0779 | 25.0062 | 24.4121 | 24.4626 | 24.7358 | 24.1057 |         |
| e c reducta  | Q9HW30              | PA4372 | 13   | 57.9 | 38.323 | 57.19  | 1.29E+09 | 65       | 354  | 24.3219 | 24.796  | 23.4767 | 24.028  | 25.9611 | 25.4923 | 25.8643 | 26.2913 |         |
|              | Q9HW32              | icmP   | 17   | 51.1 | 47.23  | 115.25 | 4.25E+09 | 102      | 446  | 25.9348 | 26.3745 | 25.4166 | 26.4622 | 27.1807 | 26.5861 | 27.0997 | 27.0102 |         |
|              | Q9HW37              | PA4364 | 3    | 32.3 | 14.316 | 12.454 | 1.97E+08 | 8        | 133  | 24.7379 | 24.4882 | 24.6527 | 24.7959 | 23.7289 | 23.7602 | 23.0469 | 24.1632 |         |
|              | Q9HW49              | PA4352 | 24   | 72.4 | 30.972 | 323.31 | 4.79E+10 | 277      | 286  | 30.2897 | 30.5554 | 30.7205 | 30.3055 | 28.2056 | 28.105  | 28.5218 | 29.8751 |         |
|              | Q9HW52              | PA4349 | 7    | 33.9 | 31.671 | 41.701 | 1.39E+09 | 34       | 298  | 26.4564 | 26.4554 | 26.5608 | 26.2394 | 25.238  | 25.5529 | 25.8046 | 25.4559 |         |
| Q9HW53       | Q9HW53              | PA4348 | 7    | 52.5 | 29.475 | 42.735 | 2.57E+09 | 33       | 261  | 28.1445 | 27.2484 | 26.8127 | 28.1302 | 25.6558 | 26.3158 | 23.5181 | 25.857  |         |
|              | Q9HW56              | PA4345 | 7    | 50.5 | 22.161 | 28.116 | 4.95E+08 | 27       | 196  | 24.0897 | 24.1693 | 24.2044 | 23.8162 | 25.4012 | 24.957  | 26.0913 | 25.2345 |         |
|              | Q9HW73              | PA4328 | 17   | 66.1 | 34.419 | 167.56 | 5.93E+09 | 120      | 304  | 27.1521 | 27.4689 | 27.7045 | 27.1596 | 24.9745 | 23.9809 | 25.1147 | 24.78   |         |
|              | Q9HW85              | PA4115 | 12   | 44.9 | 51.13  | 70.979 | 2.12E+09 | 65       | 461  | 25.7148 | 26.1    | 25.6332 | 25.5626 | 26.5574 | 26.4587 | 26.4448 | 26.6621 |         |
|              | Q9HW58              | PA4100 | 19   | 51.9 | 60.354 | 105.83 | 1.24E+09 | 90       | 559  | 25.18   | 25.7592 | 25.3808 | 25.3926 | 24.7181 | 24.4729 | 24.5457 | 24.7069 |         |
| Q9HW59       | Q9HW59              | PA4073 | 19   | 62.2 | 52.094 | 181.13 | 1.96E+10 | 186      | 495  | 29.9203 | 30.1167 | 30.2285 | 29.8164 | 29.1927 | 28.9608 | 29.1611 | 29.0752 |         |
|              | Q9HWX3              | ribC   | 7    | 29.2 | 23.469 | 53.203 | 1.08E+09 | 35       | 219  | 25.8806 | 25.9064 | 26.0047 | 24.1255 | 24.9499 | 24.738  | 24.9258 | 24.9258 |         |
|              | Q9HWX7              | thiL   | 5    | 29.5 | 32.911 | 19.835 | 2.37E+08 | 13       | 322  | 23.6072 | 23.778  | 22.9515 | 23.0282 | 24.2164 | 24.5317 | 23.5679 | 24.3462 |         |
|              | Q9HX01              | PA4026 | 5    | 38.6 | 18.049 | 22.014 | 9.61E+08 | 28       | 153  | 26.0466 | 26.057  | 26.5539 | 26.7287 | 26.0896 | 25.595  | 25.3325 | 25.7866 |         |
|              | Q9HX05,Q9I2aC,PA402 |        | 22   | 56.9 | 54.979 | 323.31 | 2.34E+10 | 230      | 506  | 29.062  | 29.1626 | 29.6094 | 28.7079 | 27.8555 | 27.743  | 28.063  | 27.9726 |         |
| yladenine i  | Q9HX12              | PA4015 | 10   | 72.8 | 16.7   | 122.78 | 5.79E+09 | 76       | 151  | 27.1241 | 27.2954 | 27.3271 | 27.4985 | 26.8823 | 26.6668 | 26.6678 | 26.4253 |         |
|              | Q9HX17              | PA4010 | 8    | 49   | 26.949 | 45.375 | 1.11E+09 | 35       | 239  | 25.3141 | 25.7733 | 25.6141 | 25.3548 | 26.2919 | 26.5098 | 26.3227 | 26.2408 |         |
|              | Q9HX32              | IptE   | 5    | 31.9 | 22.883 | 29.354 | 6.75E+08 | 28       | 207  | 24.0109 | 24.4739 | 23.3007 | 24.6613 | 26.013  | 25.1848 | 25.5897 | 25.4134 |         |
|              | Q9HX76              | PA3940 | 5    | 49.5 | 8.9923 | 87.376 | 7.25E+10 | 108      | 93   | 31.4442 | 31.3172 | 30.9321 | 31.7137 | 32.1306 | 32.0505 | 32.1217 | 31.8489 |         |
|              | Q9HX91              | PA3922 | 23   | 57.1 | 51.229 | 320.83 | 9.12E+09 | 156      | 455  | 27.6429 | 27.751  | 28.6231 | 26.1157 | 25.5564 | 26.1999 | 26.225  | 26.1999 |         |
| rized prot   | Q9HX94              | PA3919 | 18   | 63.7 | 51.699 | 224.73 | 8.51E+09 | 112      | 463  | 28.5214 | 28.341  | 28.425  | 27.889  | 26.8522 | 26.6956 | 27.3909 | 26.8675 |         |
|              | Q9HXA0              | PA3913 | 4    | 23.3 | 36.024 | 29.424 | 2.33E+08 | 16       | 331  | 23.9519 | 24.59   | 25.078  | 24.0675 | 24.2933 | 23.1905 | 22.7393 | 23.3795 |         |
|              | Q9HXB1              | ivy    | 6    | 62.1 | 16.905 | 74.318 | 3.64E+09 | 46       | 153  | 27.4955 | 26.911  | 26.0702 | 27.5881 | 27.8077 | 28.334  | 27.7926 | 28.0911 |         |
|              | Q9HXC2              | PA3891 | 6    | 36.2 | 43.303 | 62.391 | 5.8E+08  | 24       | 387  | 24.3278 | 24.1862 | 22.2273 | 23.3289 | 25.0151 | 25.2238 | 25.6405 | 25.1391 |         |
|              | Q9HXC2              | PA3880 | 5    | 67.2 | 14.38  | 57.343 | 5.21E+08 | 21       | 131  | 25.4554 | 25.546  | 24.9406 | 25.6865 | 23.9634 | 23.9398 | 23.085  | 22.3885 |         |
| /lprolyl iso | Q9HXC3              | narL   | 11   | 68.9 | 24.255 | 113.2  | 3.98E+09 | 79       | 219  | 27.2841 | 27.0263 | 27.3875 | 27.3324 | 25.9896 | 26.059  | 26.0111 | 26.1879 |         |
|              | Q9HXC5              | PA3871 | 9    | 37.1 | 30.13  | 206.49 | 2.55E+09 | 64       | 272  | 27.1419 | 26.7405 | 25.8684 | 27.2713 | 25.5565 | 25.4847 | 25.7552 | 25.7027 |         |
|              | Q9HXC1              | PA3865 | 9    | 43.7 | 28.433 | 68.893 | 1.47E+09 | 47       | 263  | 25.755  | 25.9455 | 26.3109 | 25.9731 | 25.0057 | 24.8351 | 24.8467 | 24.3811 |         |
|              | Q9HXC8              | PA3858 | 10   | 46.9 | 37.042 | 58.842 | 1.18E+09 | 54       | 341  | 25.6541 | 26.1431 | 25.7995 | 26.0448 | 25.3076 | 24.8192 | 25.3523 | 25.0258 |         |
|              | Q9HXG0              | PA3846 | 4    | 37.2 | 19.892 | 17.412 | 4.74E+08 | 18       | 180  | 25.9194 | 25.9912 | 26.4858 | 25.9877 | 23.9668 | 24.4384 | 24.8622 | 23.3156 |         |
| Q9HXC8       | Q9HXC8              | PA3836 | 19   | 75.1 | 34.22  | 268.07 | 4.63E+10 | 207      | 325  | 30.1392 | 30.3997 | 30.1174 | 30.2235 | 29.4807 | 29.3919 | 29.3162 | 29.3923 |         |
|              | Q9HXH0              | valS   | 31   | 44.4 | 107.71 | 286.26 | 9.34E+09 | 171      | 950  | 27.3074 | 27.0955 | 26.5641 | 27.2807 | 27.872  | 27.6116 | 27.5673 | 27.8553 |         |
|              | Q9HXH3              | PA3819 | 13   | 80.2 | 18.972 | 234.24 | 1.34E+10 | 126      | 182  | 27.899  | 28.0215 | 27.175  | 28.0812 | 28.8224 | 28.2522 | 28.6832 | 28.361  |         |
|              | Q9HXJ5              | hisS   | 13   | 39.9 | 47.512 | 162.68 | 5.76E+09 | 90       | 429  | 27.2303 | 27.0221 | 26.6251 | 27.0975 | 27.6505 | 27.6306 | 27.6174 | 27.5823 |         |
|              | Q9HXJ7              | bamB   | 9    | 45.8 | 40.396 | 49.493 | 6.51E+08 | 31       | 380  | 23.6508 | 24.0284 | 23.0123 | 24.5118 | 25.8457 | 24.5811 | 24.9303 | 25.1581 |         |
| Q9HXK2       | Q9HXK2              | PA3795 | 9    | 50   | 34.803 | 113.74 | 4.4E+09  | 70       | 316  | 26.8486 | 26.638  | 27.026  | 26.7832 | 28.0655 | 27.6761 | 27.8536 | 27.5713 |         |
|              | Q9HXK5              |        |      |      |        |        |          |          |      |         |         |         |         |         |         |         |         |         |

|                                      |        |        |    |      |        |        |          |     |      |         |         |         |         |         |         |         |         |
|--------------------------------------|--------|--------|----|------|--------|--------|----------|-----|------|---------|---------|---------|---------|---------|---------|---------|---------|
| sterchange<br>interchang             | Q9I0W1 | czcb   | 12 | 36.8 | 50.715 | 17.417 | 4.59E+08 | 20  | 484  | 22.4907 | 23.112  | 23.941  | 23.319  | 25.5346 | 24.8915 | 24.2793 | 25.0436 |
|                                      | Q9I0X8 | PA2504 | 4  | 26.8 | 22.822 | 16.418 | 3.6E+08  | 13  | 205  | 25.2655 | 25.6778 | 25.2194 | 25.3541 | 24.7396 | 23.0667 | 22.9579 | 23.0558 |
|                                      | Q9I101 | PA2481 | 9  | 38.8 | 31.249 | 40.981 | 1E+09    | 39  | 291  | 26.226  | 25.6333 | 25.3441 | 26.1662 | 24.5838 | 24.8783 | 24.7605 | 24.9128 |
|                                      | Q9I103 | PA2479 | 13 | 72.6 | 24.747 | 146.59 | 4.23E+09 | 59  | 226  | 24.1781 | 23.7147 | 23.986  | 23.5154 | 28.0624 | 28.1769 | 28.1306 | 27.9774 |
| anchcd-ch<br>dehydroge<br>lehydroger | Q9I104 | dsbD2  | 5  | 14   | 62.093 | 24.972 | 4.75E+08 | 17  | 587  | 22.4965 | 22.7508 | 22.8471 | 24.3038 | 25.9388 | 25.5468 | 25.3049 | 25.8577 |
|                                      | Q9I106 | dsbG   | 16 | 70.7 | 28.053 | 245.91 | 4.64E+10 | 136 | 256  | 24.1786 | 23.897  | 22.9366 | 24.0345 | 30.9852 | 30.889  | 30.9478 | 30.8522 |
|                                      | Q9I120 | PA2462 | 22 | 7.9  | 573.17 | 91.146 | 6.68E+09 | 35  | 5627 | 29.5927 | 30.0688 | 29.7366 | 29.9499 | 23.0756 | 28.9771 | 23.5019 | 23.0955 |
|                                      | Q9I171 | PA2410 | 4  | 26.2 | 31.732 | 18.921 | 5.38E+08 | 18  | 305  | 23.549  | 22.8963 | 24.2996 | 23.0954 | 25.8341 | 25.9682 | 26.525  | 25.8783 |
| riohemery                            | Q9I1C6 | PA2352 | 21 | 82.5 | 41.13  | 157.86 | 8.66E+09 | 149 | 375  | 27.8817 | 28.0117 | 27.9679 | 28.0154 | 27.4859 | 27.1815 | 27.1015 | 27.2492 |
|                                      | Q9I1F7 | PA2318 | 6  | 74.3 | 12.889 | 103.06 | 2.28E+10 | 108 | 121  | 30.2616 | 29.8897 | 28.976  | 29.9818 | 28.562  | 28.8963 | 28.8529 | 29.8813 |
|                                      | Q9I1K7 | PA2266 | 14 | 48.7 | 46.74  | 87.758 | 1.67E+09 | 67  | 439  | 26.4411 | 26.315  | 26.0466 | 26.3949 | 25.4322 | 25.4009 | 25.3951 | 25.4498 |
|                                      | Q9I1K8 | PA2265 | 16 | 36.9 | 64.715 | 69.568 | 2.29E+09 | 85  | 591  | 26.1435 | 26.2217 | 26.1164 | 26.0966 | 25.4234 | 25.1599 | 25.1796 | 25.2586 |
| n regulator                          | Q9I1L0 | PA2263 | 6  | 26.8 | 35.615 | 37.292 | 3.56E+08 | 25  | 328  | 24.2891 | 24.809  | 25.479  | 24.1584 | 23.4184 | 23.2333 | 23.131  | 23.5913 |
|                                      | Q9I1M0 | bkbD   | 20 | 58.2 | 45.774 | 190.61 | 4.25E+09 | 112 | 428  | 26.9233 | 27.3746 | 27.1115 | 27.1784 | 25.8595 | 25.4732 | 25.5123 | 25.6367 |
|                                      | Q9I1M1 | bkdA2  | 15 | 58.3 | 38.324 | 111.67 | 6.81E+09 | 100 | 350  | 28.0484 | 27.9253 | 28.6892 | 27.4346 | 25.848  | 26.0665 | 26.3433 | 26.2138 |
|                                      | Q9I1M2 | bkdA1  | 17 | 60   | 45.256 | 226.09 | 6.08E+09 | 89  | 410  | 28.046  | 27.8733 | 28.9325 | 27.3457 | 26.0342 | 25.7602 | 26.1962 | 26.4287 |
| n regulator                          | Q9I1N7 | pslB   | 9  | 32   | 53.515 | 35.166 | 4.76E+08 | 30  | 488  | 24.8537 | 25.4621 | 25.2679 | 24.4579 | 23.7508 | 24.3514 | 24.1941 | 24.4692 |
|                                      | Q9I1Y9 | PA2126 | 10 | 63   | 23.677 | 62.791 | 1.19E+09 | 36  | 211  | 26.2458 | 26.7922 | 27.0329 | 26.5052 | 24.2466 | 24.3194 | 24.538  | 24.322  |
|                                      | Q9I1Z6 | PA2119 | 16 | 66.9 | 38.561 | 222.98 | 1.76E+10 | 151 | 366  | 29.3304 | 29.3677 | 29.6578 | 29.0973 | 27.4181 | 27.2716 | 27.374  | 26.9779 |
|                                      | Q9I295 | liuR   | 6  | 53.7 | 15.631 | 68.074 | 9.69E+08 | 31  | 134  | 25.7744 | 25.621  | 25.7911 | 25.3901 | 24.7663 | 24.9604 | 24.9939 | 25.0632 |
| l-CoA/hyd                            | Q9I296 | liuA   | 23 | 72.6 | 42.209 | 200.19 | 8.07E+09 | 160 | 387  | 28.1615 | 27.9876 | 28.5097 | 27.5707 | 27.2637 | 27.0921 | 27.6727 | 27.2166 |
|                                      | Q9I298 | liuC   | 4  | 23.4 | 28.947 | 29.054 | 7.28E+08 | 24  | 265  | 26.0864 | 25.5988 | 26.0831 | 25.9122 | 25.5207 | 24.7845 | 25.3952 | 25.199  |
|                                      | Q9I2A0 | liuC   | 8  | 35.7 | 31.837 | 34.702 | 4.79E+08 | 33  | 300  | 24.3441 | 24.459  | 24.7566 | 24.3189 | 23.9954 | 23.3245 | 23.9946 | 23.6981 |
|                                      | Q9I2A9 | dhcB   | 6  | 40.8 | 23.187 | 38.841 | 1.11E+09 | 32  | 218  | 26.7656 | 26.1621 | 26.4369 | 25.3748 | 25.3784 | 25.236  | 25.6699 | 24.9129 |
| yglucosam                            | Q9I2B0 | dhcA   | 7  | 51.3 | 25.243 | 41.458 | 1.53E+09 | 50  | 232  | 26.8516 | 26.5075 | 26.4389 | 25.8431 | 25.2391 | 24.851  | 25.4603 | 24.6081 |
|                                      | Q9I2F8 | rbsB   | 6  | 28.5 | 33.86  | 16     | 4.38E+08 | 21  | 319  | 24.9257 | 25.2133 | 25.5649 | 24.9758 | 22.5341 | 22.29   | 23.8255 | 22.6323 |
|                                      | Q9I2N2 | modA   | 6  | 32.3 | 26.377 | 28.242 | 1.26E+09 | 47  | 251  | 26.353  | 26.4662 | 26.616  | 26.4242 | 25.3381 | 25.302  | 25.2741 | 25.0026 |
|                                      | Q9I2P9 | cti    | 16 | 30.4 | 86.517 | 68.806 | 5.92E+08 | 48  | 762  | 25.1784 | 24.8166 | 23.5804 | 25.4624 | 23.467  | 23.7747 | 23.312  | 23.5743 |
| n regulator                          | Q9I2Q4 | PA1841 | 5  | 37.8 | 18.654 | 15.412 | 4.47E+08 | 16  | 165  | 23.5024 | 25.0269 | 24.243  | 24.6007 | 25.4285 | 25.3464 | 25.1055 | 25.0123 |
|                                      | Q9I2I7 | PA1807 | 4  | 13.6 | 59.074 | 26.018 | 1.41E+08 | 16  | 536  | 22.6152 | 23.1115 | 22.746  | 24.1887 | 24.1164 | 24.2085 | 24.1204 | 24.1204 |
|                                      | Q9I2V0 | lpxH   | 3  | 22.5 | 27.554 | 14.839 | 2E+08    | 11  | 240  | 23.0898 | 23.3118 | 23.9942 | 23.6145 | 23.9257 | 24.172  | 24.1592 | 24.2874 |
|                                      | Q9I2V3 | PA1789 | 19 | 76.7 | 31.273 | 293.01 | 2.54E+10 | 162 | 287  | 29.4952 | 29.7649 | 30.0377 | 29.2986 | 27.3936 | 27.3918 | 27.4358 | 27.1832 |
| n regulator                          | Q9I2X1 | PA1768 | 10 | 56.4 | 19.72  | 24.433 | 3.41E+09 | 39  | 179  | 27.4608 | 28.2158 | 27.8924 | 27.8479 | 27.0889 | 27.2551 | 27.3993 | 27.2602 |
|                                      | Q9I2X2 | PA1767 | 9  | 28.1 | 56.812 | 83.114 | 7.35E+08 | 35  | 508  | 24.6264 | 24.691  | 23.7052 | 24.727  | 25.3673 | 25.3411 | 25.1073 | 25.439  |
|                                      | Q9I2Z1 | PA1746 | 9  | 76.2 | 18.189 | 170.52 | 4.45E+10 | 142 | 168  | 31.9753 | 31.7242 | 31.6615 | 32.0006 | 29.2495 | 29.323  | 29.3899 | 29.321  |
|                                      | Q9I311 | bgIX   | 9  | 17.9 | 83.002 | 16.979 | 2.05E+08 | 20  | 764  | 24.2282 | 24.2804 | 24.67   | 23.9065 | 23.0966 | 23.4895 | 23.0691 | 22.7239 |
| n regulator                          | Q9I321 | exsD   | 8  | 35.1 | 31.365 | 31.478 | 1.25E+09 | 35  | 276  | 26.3228 | 26.4124 | 26.512  | 26.508  | 25.7972 | 25.5017 | 25.6297 | 25.7839 |
|                                      | Q9I323 | popD   | 6  | 33.6 | 33.609 | 72.343 | 9.88E+08 | 20  | 295  | 26.2412 | 26.2918 | 26.4796 | 26.1577 | 27.0373 | 24.0123 | 24.2377 | 23.3662 |
|                                      | Q9I324 | popB   | 6  | 29.5 | 40.061 | 55.474 | 1.52E+09 | 30  | 390  | 26.9486 | 26.2535 | 27.1765 | 26.5527 | 25.0098 | 22.1896 | 24.117  | 24.5696 |
|                                      | Q9I338 | PA1689 | 12 | 28.7 | 77.984 | 68.226 | 1.9E+09  | 53  | 700  | 24.5656 | 24.8095 | 22.9164 | 24.9507 | 26.2292 | 26.1846 | 26.3548 | 26.3548 |
| n regulator                          | Q9I352 | PA1673 | 10 | 52.9 | 17.853 | 167.92 | 1.38E+10 | 89  | 153  | 25.6705 | 29.7944 | 29.0998 | 29.8122 | 28.0515 | 28.0278 | 27.4538 | 27.4925 |
|                                      | Q9I371 | PA1654 | 8  | 41.8 | 43.311 | 55.308 | 7.87E+08 | 33  | 388  | 24.7604 | 24.6254 | 24.6321 | 24.6535 | 25.0838 | 25.3857 | 25.5765 | 25.7125 |
|                                      | Q9I3D3 | sucA   | 42 | 59   | 105.88 | 323.31 | 3.69E+10 | 380 | 943  | 28.3962 | 28.7707 | 27.9604 | 28.8741 | 29.3576 | 29.2786 | 28.8893 | 29.3155 |
|                                      | Q9I3F7 | PA1560 | 4  | 37.3 | 15.667 | 35.892 | 7.6E+08  | 18  | 142  | 23.3268 | 24.2344 | 22.4476 | 22.1661 | 26.032  | 26.1133 | 25.9939 | 26.6663 |
| n regulator                          | Q9I3F8 | PA1559 | 12 | 71.2 | 26.551 | 93.168 | 1.67E+09 | 44  | 203  | 24.2576 | 23.9655 | 22.8709 | 24.5681 | 26.7915 | 26.4501 | 26.2134 | 27.0452 |
|                                      | Q9I3F1 | ccoD2  | 7  | 37.1 | 22.778 | 26.711 | 1.94E+09 | 38  | 202  | 27.2537 | 27.3116 | 26.693  | 27.5404 | 23.4866 | 25.9691 | 23.8817 | 26.358  |
|                                      | Q9I3G1 | ccoP2  | 9  | 45.2 | 33.812 | 52.42  | 9.74E+08 | 43  | 308  | 25.4322 | 25.1046 | 26.3084 | 26.1892 | 23.966  | 23.0134 | 24.214  | 24.214  |
|                                      | Q9I3G3 | ccoP1  | 3  | 10.9 | 53.108 | 12.092 | 5.04E+08 | 23  | 175  | 24.5308 | 25.1502 | 24.0124 | 25.0907 | 26.0629 | 25.6101 | 24.9455 | 25.7147 |
| n regulator                          | Q9I3G6 | ccoP4  | 5  | 23.6 | 32.236 | 99.766 | 1.35E+09 | 58  | 289  | 24.4315 | 24.9583 | 24.4033 | 25.4335 | 25.1324 | 25.4288 | 25.4953 | 25.4953 |
|                                      | Q9I4A1 | glaA   | 5  | 53.4 | 44.18  | 23.312 | 3.01E+08 | 19  | 427  | 24.0623 | 23.0121 | 22.1044 | 22.9582 | 24.3947 | 24.6506 | 24.4605 | 24.777  |
|                                      | Q9I353 | gbaA   | 11 | 43.6 | 34.727 | 75.716 | 4.2E+09  | 63  | 319  | 27.7834 | 28.1165 | 28.3921 | 27.1923 | 27.3229 | 26.9046 | 27.1369 | 27.1369 |
|                                      | Q9I402 | PA1342 | 23 | 75.5 | 33.054 | 323.31 | 3.76E+10 | 275 | 302  | 30.6585 | 30.7228 | 30.6132 | 30.5969 | 29.8658 | 29.8636 | 29.9048 | 29.8102 |
| nase-aspar                           | Q9I407 | ansB   | 16 | 61.9 | 38.644 | 203.75 | 3.22E+10 | 195 | 362  | 29.1375 | 29.3461 | 29.7983 | 29.142  | 28.6228 | 28.6471 | 28.6507 | 28.5707 |
|                                      | Q9I448 | PA1296 | 9  | 52.6 | 33.729 | 55.531 | 1.11E+09 | 37  | 310  | 22.1919 | 23.7642 | 24.1738 | 23.3407 | 26.3892 | 26.2027 | 27.2422 | 25.893  |
|                                      | Q9I457 | PA1287 | 6  | 46.7 | 20.217 | 34.49  | 1.23E+09 | 31  | 184  | 26.7898 | 26.3455 | 25.7429 | 26.7877 | 25.5619 | 25.7864 | 25.2541 | 25.9128 |
|                                      | Q9I484 | PA1260 | 7  | 39.9 | 29.142 | 34.693 | 3.89E+08 | 18  | 273  | 24.8551 | 24.5758 | 25.5418 | 24.6421 | 22.9149 | 23.8575 | 22.896  | 23.177  |
| hione pero                           | Q9I480 | PA1228 | 3  | 38.8 | 12.362 | 22.057 | 1.27E+09 | 24  | 116  | 25.929  | 26.3129 | 25.692  | 26.4434 | 26.9663 | 26.751  | 26.7666 | 26.3178 |
|                                      | Q9I483 | PA1225 | 7  | 48.1 | 22.551 | 56.301 | 2.71E+08 | 21  | 208  | 24.5427 | 24.8542 | 23.8437 | 24.9344 | 24.3955 | 22.9458 | 22.2895 | 22.5657 |
|                                      | Q9I4G6 | PA1171 | 10 | 37.9 | 42.682 | 61.409 | 1.6E+09  | 41  | 398  | 26.0401 | 26.4557 | 26.501  | 26.2718 | 25.5587 | 25.7179 | 25.6971 | 25.5334 |
|                                      | Q9I4I0 | PA1157 | 3  | 22.5 | 26.405 | 17.076 | 2.7E+08  | 12  | 236  | 23.4376 | 22.7872 | 23.4217 | 22.4025 | 24.3487 | 24.7678 | 25.2624 | 23.0396 |
| e-diphosph                           | Q9I4I1 | nrDA   | 48 | 60.6 | 107.11 | 323.31 | 2.03E+10 | 337 | 963  | 27.0145 | 27.4913 | 26.577  | 27.5083 | 28.0822 | 27.7331 | 27.7689 | 28.1267 |
|                                      | Q9I4I8 | PA1137 | 12 | 40.9 | 34.731 | 59.446 | 9.49E+08 | 42  | 328  | 26.1633 | 25.6714 | 26.4066 | 25.6007 | 24.5086 | 24.3147 | 24.6097 | 24.3818 |
|                                      | Q9I4K0 | hchA   | 5  | 26.5 | 31.898 | 30.229 | 5.5E+08  | 22  | 291  | 25.729  | 26.0067 | 26.2157 | 26.0115 | 25.1806 | 23.6008 | 25.4045 | 24.8575 |
|                                      | Q9I4I2 | PA1123 | 7  | 86.8 | 12.167 | 57.915 | 1.08E+09 | 37  | 106  | 26.7629 | 26.3135 | 26.729  | 26.917  | 24.9066 | 24.9623 | 25.8562 | 24.9076 |
| nase S <sup>+</sup>                  | Q9I4O3 | PA1076 | 5  | 52.5 | 13.743 | 64.311 | 1.43E+10 | 57  | 120  | 30.3958 | 29.7947 | 29.0953 | 30.3537 | 27.9672 | 28.8187 | 28.1718 | 28.8035 |
|                                      | Q9I455 | pdxH   | 12 | 60   | 24.86  | 163.17 | 1.36E+10 | 88  | 215  | 29.3945 | 29.4135 | 29.0343 | 29.6455 | 28.1962 | 27.944  | 27.7856 | 27.8785 |
|                                      | Q9I4W2 | PA1011 | 11 | 53   | 43     |        |          |     |      |         |         |         |         |         |         |         |         |

|                                           |        |          |    |      |        |        |          |     |     |         |         |         |         |         |         |         |         |
|-------------------------------------------|--------|----------|----|------|--------|--------|----------|-----|-----|---------|---------|---------|---------|---------|---------|---------|---------|
|                                           | G3XD71 | PA0620   | 2  | 6.2  | 72.292 | 8.7943 | 99903000 | 9   | 691 | 23.9443 | 23.1724 | 24.1046 | 24.2349 | 22.8476 | 23.152  | 24.1566 | 24.5852 |
| rotein ass-<br>ntaining pr<br>rotein Niri | O68562 | bamE     | 3  | 38.6 | 19.395 | 11.234 | 1.8E+08  | 12  | 176 | 23.3836 | 22.4799 | 24.0626 | 23.1813 | 22.0182 | 24.5603 | 24.0074 | 24.4109 |
|                                           | P42810 | PA4667   | 4  | 11.2 | 66.29  | 16.453 | 1.9E+08  | 12  | 590 | 23.7435 | 23.3562 | 21.9493 | 23.3001 | 23.905  | 22.8825 | 24.1107 | 23.8962 |
|                                           | P59415 | nirH     | 5  | 30.4 | 19.582 | 10.704 | 1.54E+08 | 11  | 171 | 23.9793 | 24.4736 | 24.2834 | 22.844  | 22.9079 | 24.1475 | 21.6921 | 22.9597 |
|                                           | Q9HT29 | PA5545   | 3  | 16.3 | 33.627 | 14.163 | 1.38E+08 | 13  | 319 | 24.168  | 23.9832 | 24.0584 | 24.2337 | 22.5911 | 24.451  | 22.523  | 22.7838 |
|                                           | Q9HT84 | PA5487   | 5  | 12.1 | 73.998 | 32.499 | 1.25E+08 | 9   | 671 | 23.1412 | 22.907  | 23.0499 | 24.2399 | 23.6155 | 23.3123 | 23.8582 | 23.5807 |
|                                           | Q9HU40 | PA5083   | 3  | 35.3 | 12.558 | 8.0832 | 92849000 | 11  | 116 | 24.3219 | 22.4803 | 22.923  | 23.3342 | 23.4585 | 22.5558 | 23.9555 | 24.1379 |
|                                           | Q9HUU0 | PA4873   | 4  | 20   | 46.299 | 12.437 | 1.02E+08 | 17  | 421 | 24.3988 | 23.0892 | 24.4001 | 23.3679 | 24.4136 | 24.1945 | 23.443  | 24.3209 |
|                                           | Q9HUW7 | PA4843   | 9  | 31   | 61.599 | 42.612 | 2.48E+08 | 13  | 542 | 24.1246 | 24.6103 | 24.2104 | 24.2719 | 22.9727 | 23.4995 | 24.3372 | 24.7239 |
|                                           | Q9HVQ6 | PA4516   | 4  | 19.9 | 29.587 | 11.523 | 1.16E+08 | 11  | 271 | 23.501  | 24.1566 | 23.0246 | 23.1832 | 23.879  | 22.9053 | 24.4736 | 23.9676 |
|                                           | Q9HW12 | PA4394   | 2  | 13.7 | 29.817 | 14.725 | 1.99E+08 | 13  | 278 | 23.3538 | 23.5774 | 23.6334 | 24.511  | 24.1115 | 24.0838 | 24.0563 | 24.4668 |
|                                           | Q9HX60 | PA3956   | 8  | 97.9 | 15.453 | 44.921 | 7.88E+08 | 15  | 144 | 27.0345 | 23.3294 | 23.9155 | 26.6043 | 23.3884 | 24.397  | 23.2672 | 22.3217 |
|                                           | Q9HX50 | nalC     | 2  | 20.2 | 23.533 | 14.921 | 1.42E+08 | 8   | 213 | 23.0928 | 23.6149 | 22.8989 | 24.5709 | 24.3118 | 24.6448 | 23.1077 | 23.8055 |
|                                           | Q9HXW8 | PA3672   | 2  | 7.8  | 33.499 | 6.3282 | 98465000 | 8   | 307 | 23.4421 | 23.1036 | 22.1023 | 22.3713 | 23.8367 | 23.0026 | 23.845  | 23.7831 |
|                                           | Q9HY18 | PA3417   | 6  | 30.7 | 40.414 | 22.437 | 2.42E+08 | 11  | 365 | 24.7621 | 22.6769 | 25.0435 | 24.4863 | 23.9803 | 22.466  | 23.2142 | 22.8264 |
|                                           | Q9HY19 | PA3416   | 2  | 11.4 | 36.143 | 15.821 | 1.18E+08 | 8   | 333 | 24.2478 | 23.6242 | 24.898  | 23.7743 | 22.3133 | 23.7863 | 23.2264 | 23.2025 |
|                                           | Q9HY10 | PA3415   | 8  | 43.8 | 39.52  | 53.42  | 3.79E+08 | 16  | 370 | 24.1697 | 24.7907 | 25.724  | 23.9246 | 23.1673 | 22.2322 | 23.8652 | 23.9246 |
| stidine kins                              | Q9I0X9 | PA2503   | 7  | 29   | 45.895 | 19.642 | 1.96E+08 | 13  | 417 | 23.528  | 23.2151 | 23.4309 | 23.0523 | 23.4406 | 24.1696 | 23.9214 | 23.8252 |
|                                           | Q9I102 | PA2480   | 4  | 15.5 | 47.692 | 13.62  | 89224000 | 13  | 440 | 23.5845 | 22.7875 | 22.8826 | 23.0709 | 23.2017 | 22.7999 | 22.7503 | 23.2288 |
|                                           | Q9I124 | PA2458   | 3  | 18.2 | 41.261 | 17.124 | 1.18E+08 | 12  | 373 | 23.4032 | 24.5829 | 24.53   | 24.3773 | 22.5288 | 22.6007 | 23.0236 | 23.558  |
|                                           | Q9I126 | PA2457   | 2  | 8.5  | 36.102 | 11.77  | 63192000 | 7   | 326 | 23.9004 | 22.64   | 23.6874 | 23.7335 | 22.7085 | 22.9965 | 23.1599 | 22.8947 |
|                                           | Q9I2A6 | bdnA     | 3  | 23   | 26.727 | 10.916 | 1.69E+08 | 11  | 256 | 24.0358 | 24.0812 | 24.347  | 23.8633 | 23.8712 | 22.9458 | 22.5005 | 23.7952 |
|                                           | Q9I2B2 | PA1997   | 5  | 14.4 | 71.929 | 22.19  | 1.98E+08 | 11  | 651 | 23.2659 | 23.6937 | 24.3663 | 24.0237 | 23.3438 | 22.1843 | 22.9991 | 23.767  |
|                                           | Q9I2R3 | PA1832   | 4  | 24.9 | 38.069 | 16.557 | 90460000 | 7   | 341 | 23.1738 | 23.221  | 22.4082 | 24.0265 | 24.4197 | 22.7283 | 23.7534 | 23.0149 |
|                                           | Q9I4E5 | PA1193   | 6  | 37.2 | 25.292 | 11.464 | 1.95E+08 | 14  | 223 | 23.2358 | 23.1737 | 23.4675 | 23.8009 | 24.2938 | 24.1453 | 23.0679 | 24.4847 |
| ic nitrate r                              | Q9I4X8 | napA     | 8  | 14.5 | 92.974 | 16.184 | 1.52E+08 | 13  | 829 | 23.6871 | 23.7825 | 24.4678 | 23.5758 | 23.842  | 23.6159 | 24.1229 | 23.0353 |
|                                           | Q9I4X8 | PA0991   | 3  | 32.8 | 13.286 | 14.686 | 1.66E+08 | 11  | 125 | 23.6261 | 23.6694 | 21.8314 | 24.2406 | 23.2372 | 23.2467 | 22.9562 | 23.6464 |
| zyme inh                                  | Q9I574 | mIc      | 3  | 37   | 13.695 | 9.1778 | 1.47E+08 | 13  | 127 | 23.7923 | 23.9375 | 23.4898 | 22.4457 | 24.266  | 24.0108 | 23.8714 | 24.2295 |
|                                           | Q9I673 | PA0444   | 6  | 25.3 | 45.265 | 31.49  | 2.5E+08  | 18  | 427 | 24.927  | 24.7157 | 23.5246 | 24.6553 | 22.7871 | 23.3418 | 23.242  | 24.5654 |
|                                           | Q9I6W5 | PA0167   | 2  | 12.2 | 24.533 | 7.0685 | 1.99E+08 | 12  | 221 | 23.1775 | 24.1683 | 23.8381 | 22.7863 | 24.7482 | 24.5886 | 23.3677 | 24.6565 |
| hain releas                               | E1U18  | prfB     | 19 | 63.7 | 41.17  | 323.31 | 1.43E+10 | 176 | 364 | 27.9361 | 27.8251 | 28.0347 | 27.7251 | 27.9997 | 28.2035 | 28.3476 | 28.3124 |
| /Cys-tRNA                                 | G3XC74 | PA3580   | 3  | 25.6 | 16.493 | 14.589 | 3.9E+08  | 15  | 156 | 25.4654 | 23.2886 | 23.3611 | 25.3132 | 25.239  | 25.4686 | 25.1506 | 25.4955 |
| stidine kins                              | G3XC76 | PA1458   | 24 | 50.3 | 79.737 | 291.08 | 1.14E+10 | 216 | 753 | 27.8241 | 27.6987 | 27.9216 | 27.6816 | 27.5128 | 27.6    | 27.5542 | 27.8555 |
|                                           | G3XCU6 | cysB     | 11 | 47.2 | 36.109 | 115.06 | 3.11E+09 | 69  | 324 | 26.8287 | 27.0522 | 27.3016 | 26.5566 | 26.5997 | 26.7242 | 26.7549 | 26.6333 |
|                                           | G3XCU9 | PA2020   | 3  | 16.7 | 23.727 | 6.2049 | 1.98E+08 | 13  | 210 | 23.8758 | 23.2683 | 24.0793 | 23.0481 | 24.1825 | 24.5225 | 23.1737 | 24.2598 |
|                                           | G3XCVO | fleQ     | 20 | 52.7 | 55.276 | 190.36 | 7.2E+09  | 120 | 490 | 27.5167 | 27.4882 | 27.8449 | 27.0377 | 27.1957 | 27.2481 | 27.3319 | 27.6062 |
|                                           | G3XCX8 | PA0900   | 2  | 31.2 | 10.641 | 84.031 | 1.24E+09 | 20  | 96  | 27.038  | 26.5381 | 25.1162 | 26.4655 | 26.7411 | 26.9651 | 26.8856 | 26.6812 |
|                                           | G3XCZ3 | pilZ     | 6  | 66.9 | 12.904 | 25.183 | 1.6E+09  | 41  | 118 | 26.1709 | 26.0573 | 25.4096 | 26.5909 | 25.9605 | 26.3026 | 25.7733 | 25.9569 |
| carrier prc                               | G3XCZ6 | fabD     | 16 | 56.1 | 32.444 | 261.1  | 2.97E+10 | 158 | 312 | 30.2119 | 29.9901 | 29.711  | 29.9851 | 29.837  | 30.0924 | 29.7635 | 29.9321 |
|                                           | G3XD09 | gltD     | 7  | 27.9 | 52.624 | 62.423 | 9.51E+08 | 42  | 477 | 25.1736 | 25.0445 | 25.2215 | 25.1134 | 25.3292 | 25.6778 | 25.7864 | 25.2762 |
|                                           | G3XD11 | oprH     | 7  | 44.5 | 21.574 | 130.87 | 2.26E+09 | 39  | 200 | 26.3424 | 26.3771 | 26.2555 | 26.4407 | 26.7675 | 26.146  | 26.8116 | 26.5644 |
|                                           | G3XD13 | PA0902   | 11 | 55.7 | 35.462 | 118.17 | 2.34E+09 | 72  | 334 | 26.2988 | 26.5132 | 26.4495 | 26.2246 | 26.4049 | 26.5735 | 26.1579 | 26.2961 |
| ding trans                                | G3XD14 | dksA     | 12 | 73.6 | 17.344 | 129.96 | 5.48E+10 | 182 | 148 | 30.6173 | 30.5716 | 29.1893 | 30.7827 | 31.0477 | 30.9611 | 30.8665 | 30.9178 |
|                                           | G3XD17 | dsbC     | 8  | 57   | 26.095 | 153.33 | 8.31E+09 | 74  | 242 | 28.037  | 28.1333 | 27.6019 | 28.232  | 28.6806 | 28.4458 | 28.6533 | 28.5122 |
| ig chemota                                | G3XD24 | PA4915;p | 12 | 30   | 68.016 | 36.405 | 1.25E+08 | 12  | 629 | 24.1733 | 24.3713 | 23.0133 | 23.7894 | 23.1186 | 23.0799 | 24.2486 | 23.4002 |
|                                           | G3XD27 | PA5055   | 7  | 81.3 | 13.653 | 55.029 | 1.74E+09 | 40  | 123 | 26.7474 | 26.3005 | 25.111  | 26.6647 | 26.1458 | 26.6968 | 25.8728 | 26.2219 |
|                                           | G3XD36 | ptsP     | 15 | 36.6 | 83.606 | 81.35  | 1.12E+09 | 60  | 759 | 25.134  | 25.0301 | 24.9974 | 24.917  | 24.7977 | 24.6031 | 24.9953 | 25.2787 |
|                                           | G3XD47 | aotJ     | 23 | 81.1 | 28.01  | 273.55 | 4.54E+10 | 212 | 259 | 29.4673 | 29.684  | 29.1103 | 29.2139 | 29.3783 | 29.7768 | 30.0765 | 29.7544 |
|                                           | G3XD52 | PA3302   | 8  | 78.2 | 16.901 | 84.965 | 7.09E+09 | 102 | 156 | 28.4571 | 28.058  | 28.1445 | 28.4649 | 28.1809 | 28.0045 | 28.2517 | 28.3307 |
|                                           | G3XD54 | dnaQ     | 10 | 54.1 | 26.814 | 132.99 | 5.46E+09 | 97  | 246 | 26.9891 | 26.9553 | 26.7938 | 27.0164 | 27.2709 | 27.2331 | 27.2005 | 27.1977 |
|                                           | G3XD55 | pilY2    | 3  | 30.4 | 12.986 | 11.776 | 2.77E+08 | 11  | 115 | 22.6199 | 22.8323 | 23.0688 | 25.1424 | 23.5643 | 25.0405 | 24.9552 | 25.1195 |
| amate met                                 | G3XD63 | chpB     | 5  | 34.7 | 37.237 | 24.755 | 5.21E+08 | 18  | 343 | 23.3867 | 25.8004 | 25.6565 | 26.3151 | 20.7874 | 25.6261 | 22.8453 | 25.5457 |
| termining j                               | G3XD64 | fleN     | 10 | 41.1 | 30.037 | 71.401 | 2.74E+09 | 69  | 280 | 26.1004 | 26.1032 | 26.5579 | 25.8439 | 25.6312 | 25.7506 | 25.8433 | 25.7574 |
|                                           | G3XD70 | PA5279   | 4  | 33   | 25.767 | 68.789 | 3.93E+09 | 41  | 233 | 27.5816 | 27.7142 | 27.6054 | 27.7667 | 27.6815 | 27.5296 | 27.5627 | 27.5163 |
|                                           | G3XD72 | PA1464   | 11 | 83.6 | 17.536 | 169.8  | 1.66E+10 | 102 | 159 | 28.8174 | 28.7533 | 28.6972 | 28.8264 | 27.8877 | 28.4935 | 28.5668 | 28.5038 |
|                                           | G3XD74 | dacC     | 11 | 45.6 | 42.457 | 126.37 | 5.83E+09 | 92  | 386 | 27.163  | 27.782  | 27.31   | 27.6079 | 27.8517 | 27.5694 | 27.8008 | 27.9684 |
| 1,6-dicarbo                               | G3XD76 | dapD     | 12 | 43.6 | 35.973 | 116.97 | 1.74E+10 | 115 | 344 | 28.7223 | 28.6541 | 28.9196 | 28.6708 | 28.7293 | 28.6528 | 28.5597 | 28.5091 |
|                                           | G3XD95 | chpC     | 9  | 71.4 | 17.625 | 137.62 | 1.75E+09 | 71  | 168 | 26.1561 | 25.859  | 24.9312 | 26.0387 | 25.1984 | 25.6468 | 24.6616 | 25.5011 |
|                                           | G3XD97 | ptsX     | 14 | 56.8 | 37.391 | 111.39 | 2.12E+09 | 47  | 340 | 27.9941 | 27.253  | 27.6497 | 27.1426 | 27.3271 | 23.2165 | 25.5157 | 27.7621 |
| carrier-pro                               | G3XD12 | fabF1    | 13 | 62.1 | 43.497 | 323.31 | 2.94E+10 | 142 | 414 | 29.4288 | 29.4111 | 29.5327 | 29.2632 | 29.5505 | 29.5503 | 29.4318 | 29.469  |
|                                           | G3XD44 | PA0653   | 10 | 83.6 | 15.236 | 81.348 | 4.57E+09 | 77  | 140 | 27.3038 | 27.4587 | 27.3566 | 27.4667 | 27.2773 | 27.3283 | 27.177  | 27.1366 |
|                                           | G3XD45 | oprE     | 5  | 18.7 | 49.666 | 88.226 | 9.36E+08 | 30  | 460 | 26.3655 | 26.7082 | 25.8542 | 26.6596 | 25.8715 | 25.9009 | 25.9232 | 25.9422 |
|                                           | G3XD80 | crc      | 13 | 70.7 | 29.844 | 98.78  | 5.06E+09 | 101 | 259 | 27.2611 | 26.9506 | 27.2689 | 27.1166 | 26.8795 | 27.1358 | 27.1584 | 26.9898 |
|                                           | G3XD82 | PA0974   | 15 | 61.3 | 29.997 | 168.53 | 1.69E+10 | 150 | 274 | 28.7895 | 27.9668 | 28.9022 | 28.8497 | 28.6986 | 29.2425 | 28.4677 | 29.2596 |
| ie phospho                                | Q05927 | cysH     | 8  | 41.9 | 30.215 | 86.202 | 2.38E+09 | 52  | 267 | 26.424  | 26.7114 | 26.8389 | 26.7134 | 26.2854 | 26.2204 | 26.4078 | 26.2857 |
| nsport act                                | Q30525 | aotP     | 8  | 41.7 | 27.956 | 15.026 |          |     |     |         |         |         |         |         |         |         |         |

|              |        |        |    |      |        |        |          |      |     |         |         |         |         |         |         |         |         |
|--------------|--------|--------|----|------|--------|--------|----------|------|-----|---------|---------|---------|---------|---------|---------|---------|---------|
| l-phosphat   | P27726 | gap    | 8  | 39.8 | 36.17  | 131.66 | 2.38E+09 | 60   | 334 | 26.3    | 26.4803 | 26.6894 | 26.1031 | 26.5953 | 25.9152 | 26.5169 | 26.1749 |
| utratrde     | P28811 | mms8   | 4  | 26.8 | 30.486 | 23.562 | 2.91E+08 | 19   | 298 | 25.4738 | 24.6272 | 23.2904 | 25.0516 | 22.4925 | 23.2347 | 24.194  | 23.4892 |
| onine synt   | P29363 | thrC   | 24 | 62.7 | 51.795 | 196.45 | 8.75E+09 | 147  | 469 | 27.2285 | 27.4463 | 26.7603 | 27.43   | 27.7561 | 27.7628 | 27.7563 | 27.9462 |
| ioserine kin | P29364 | thrB   | 8  | 31   | 35.374 | 53.833 | 1.64E+09 | 53   | 316 | 26.6471 | 26.6316 | 25.9126 | 26.7581 | 26.3782 | 26.6918 | 26.6154 | 26.4625 |
| 'ine dehydi  | P29365 | hom    | 13 | 48.2 | 46.223 | 194.8  | 2.09E+10 | 140  | 434 | 28.747  | 28.7891 | 28.862  | 28.411  | 28.7576 | 28.7063 | 28.9203 | 28.9519 |
| Da chapen    | P30718 | groL   | 49 | 78.2 | 57.085 | 323.31 | 1.11E+12 | 2194 | 547 | 33.9094 | 33.897  | 34.2853 | 33.9213 | 34.1123 | 33.9289 | 34.0901 | 33.8527 |
| Da chapen    | P30720 | groS   | 5  | 51.5 | 10.267 | 158.36 | 1.23E+11 | 130  | 97  | 32.8403 | 32.8567 | 31.8623 | 33.0513 | 32.8378 | 32.7505 | 32.5501 | 32.9423 |
| nyrophosph   | P30819 | nadC   | 11 | 44.7 | 30.551 | 147.04 | 6.81E+09 | 110  | 282 | 26.9345 | 27.069  | 27.1173 | 26.9891 | 26.7222 | 26.9325 | 26.8539 | 26.7806 |
| uconate de   | P31961 | edd    | 18 | 49.7 | 65.182 | 245.49 | 8.6E+09  | 136  | 608 | 26.9913 | 27.0368 | 27.1324 | 26.7787 | 27.4022 | 27.181  | 27.5513 | 27.212  |
| scriptional  | P32265 | nfxB   | 5  | 44.9 | 21.077 | 66.227 | 9.76E+09 | 42   | 187 | 28.8633 | 29.0118 | 28.9101 | 29.0729 | 29.3509 | 29.4205 | 29.3831 | 29.057  |
| unit pseud   | P33640 | riuD   | 6  | 22.5 | 35.625 | 27.109 | 6.4E+08  | 23   | 320 | 25.0074 | 25.0517 | 25.1994 | 25.0899 | 25.2752 | 24.9982 | 24.7919 | 25.0696 |
| nino acid o  | P33642 | PA4548 | 8  | 41.8 | 39.445 | 34.993 | 1.24E+09 | 44   | 364 | 25.479  | 25.163  | 25.7155 | 25.1252 | 25.7349 | 25.6535 | 25.5852 | 25.8212 |
| main prote   | P33663 | PA4543 | 5  | 43.4 | 26.047 | 40.285 | 4.97E+08 | 23   | 242 | 25.402  | 22.7704 | 23.8031 | 25.4543 | 24.8806 | 26.0583 | 22.3054 | 25.5323 |
| roquinat     | P34002 | aroB   | 15 | 54.6 | 40.109 | 119.9  | 1.03E+10 | 134  | 368 | 27.2862 | 27.2297 | 27.3795 | 27.3306 | 27.2568 | 27.2047 | 27.2812 | 27.1548 |
| kimate kin   | P34003 | aroK   | 5  | 40.1 | 19.237 | 40.375 | 4.1E+08  | 14   | 172 | 24.7367 | 24.9018 | 25.253  | 24.8054 | 24.7934 | 24.8879 | 23.2266 | 25.2885 |
| tion syste   | P35818 | xcpQ   | 6  | 24.6 | 69.952 | 12.565 | 1.67E+08 | 20   | 658 | 23.7931 | 23.5156 | 23.4796 | 23.7242 | 23.9215 | 24.4484 | 23.8444 | 22.9444 |
| xA repress   | P37452 | lexA   | 5  | 35.3 | 22.506 | 33.332 | 2.59E+09 | 39   | 204 | 26.6656 | 27.0824 | 27.2845 | 26.9596 | 26.9214 | 26.875  | 26.7456 | 26.5123 |
| in carboxy   | P37798 | accB   | 22 | 56.3 | 48.887 | 301.02 | 5.93E+10 | 230  | 449 | 29.7835 | 29.957  | 29.9999 | 29.5339 | 29.7159 | 29.9137 | 29.9414 | 29.9083 |
| rotein of .  | P37799 | accC   | 7  | 57.7 | 16.455 | 255.93 | 5.67E+10 | 166  | 156 | 30.9322 | 30.6934 | 29.5659 | 31.1882 | 31.0952 | 31.3965 | 30.6121 | 31.236  |
| phate synt   | P38098 | carA   | 16 | 62.7 | 40.828 | 225.78 | 2.49E+10 | 169  | 378 | 29.2697 | 29.3682 | 29.2289 | 29.0599 | 29.0599 | 29.3103 | 29.1696 | 29.2766 |
| phate synt   | P38100 | carB   | 53 | 65.4 | 117.33 | 323.31 | 1.91E+10 | 304  | 547 | 27.8495 | 27.6802 | 26.8945 | 27.6374 | 27.6046 | 27.6046 | 27.472  | 27.9075 |
| ydrolyticp   | P38103 | capB   | 14 | 68.3 | 28.324 | 153.17 | 8.45E+09 | 89   | 268 | 27.679  | 27.9036 | 27.7877 | 27.6965 | 28.0082 | 27.9052 | 27.8838 | 28.0844 |
| ed DNA-bi    | P40947 | ssb    | 12 | 67.9 | 18.557 | 143.73 | 1.1E+10  | 122  | 165 | 30.0761 | 30.305  | 29.7118 | 29.8987 | 30.3538 | 30.2785 | 30.4571 | 30.1701 |
| Protein PilI | P42257 | pilI   | 10 | 24.8 | 72.527 | 144.61 | 1.05E+09 | 46   | 682 | 25.1925 | 25.7823 | 24.8191 | 25.3431 | 24.9457 | 24.6114 | 24.524  | 25.0303 |
| 2-C-methy    | P42805 | ispE   | 3  | 21.3 | 30.843 | 13.305 | 3.86E+08 | 20   | 282 | 24.4953 | 24.6515 | 24.4664 | 24.5321 | 24.8709 | 24.4965 | 24.25   | 24.8683 |
| hain reles   | P42806 | prfA   | 17 | 51.9 | 40.04  | 271.81 | 1.39E+10 | 102  | 360 | 29.8843 | 29.8963 | 30.158  | 30.0045 | 30.0345 | 30.0562 | 30.0342 | 30.0387 |
| yl-rRNA re   | P42807 | hemA   | 7  | 30.8 | 46.123 | 80.432 | 8.09E+08 | 46   | 422 | 25.1704 | 24.9352 | 24.998  | 24.7535 | 25.1376 | 25.3185 | 25.1257 | 25.5699 |
| io-acid am   | P43336 | phhC   | 13 | 50.4 | 43.273 | 72.182 | 2.42E+09 | 88   | 399 | 25.926  | 25.7841 | 25.773  | 26.0933 | 26.0708 | 25.7866 | 25.8661 | 25.851  |
| rotein PilH  | P43501 | pilH   | 5  | 60.3 | 13.273 | 28.633 | 8.98E+09 | 40   | 121 | 29.7576 | 28.8207 | 27.7519 | 29.9762 | 28.221  | 29.0897 | 27.5583 | 28.9023 |
| Protein PilI | P43502 | pilI   | 5  | 46.1 | 19.934 | 42.613 | 5.13E+08 | 30   | 178 | 24.8137 | 24.7481 | 24.8665 | 24.7348 | 24.5292 | 24.6008 | 24.1248 | 24.4728 |
| o:poroprot   | P43898 | hemF   | 15 | 63.6 | 34.806 | 119.95 | 1.11E+10 | 169  | 305 | 27.7637 | 27.9297 | 27.8289 | 27.9407 | 27.4251 | 27.4385 | 27.4152 | 27.2405 |
| ie oxidorec  | P43903 | qor    | 12 | 56.6 | 35.094 | 103    | 3.47E+09 | 89   | 325 | 26.5392 | 26.5414 | 26.5932 | 26.2386 | 26.1601 | 26.0199 | 26.0509 | 25.9779 |
| artate O-m   | P45683 | pcm    | 9  | 56.9 | 23.407 | 103.06 | 4.97E+09 | 72   | 211 | 27.2521 | 27.4899 | 27.5424 | 27.3455 | 27.5594 | 27.5754 | 27.5272 | 27.6053 |
| rotein PilC  | P46384 | pilG   | 7  | 59.3 | 14.718 | 49.757 | 7.71E+09 | 63   | 135 | 28.503  | 28.2226 | 27.4073 | 28.6754 | 27.1022 | 27.8001 | 26.8708 | 27.7077 |
| ision prote  | P47203 | ftsA   | 26 | 74.3 | 44.646 | 323.31 | 2.74E+10 | 245  | 417 | 28.6588 | 28.8428 | 28.9273 | 28.5127 | 28.7582 | 28.8723 | 29.0518 | 28.8625 |
| ision prote  | P47204 | ftsZ   | 28 | 87.3 | 41.218 | 323.31 | 5.29E+10 | 281  | 394 | 29.6467 | 29.8914 | 29.9445 | 29.6951 | 29.3393 | 29.2502 | 29.3875 | 29.1781 |
| oyl] N-acet  | P47205 | lpwC   | 17 | 54.8 | 33.435 | 160.56 | 4.01E+10 | 165  | 303 | 29.4679 | 29.7516 | 29.8098 | 29.4354 | 29.2915 | 29.4353 | 29.3734 | 29.4407 |
| yrinogen-I   | P48246 | hemD   | 5  | 42.6 | 27.279 | 31.611 | 4.33E+08 | 28   | 251 | 25.1    | 25.0954 | 24.5975 | 24.8821 | 24.7884 | 24.6101 | 24.9901 | 24.9323 |
| ialdehyde    | P48247 | hemL   | 24 | 74.5 | 45.397 | 316.96 | 2.09E+10 | 224  | 427 | 28.8353 | 28.9236 | 29.0236 | 28.4326 | 28.5235 | 28.7098 | 28.8593 | 28.9701 |
| gyrase subi  | P48372 | gyrA   | 33 | 48.1 | 101.13 | 301.01 | 1.05E+10 | 208  | 923 | 26.7093 | 27.3125 | 26.5266 | 27.4113 | 27.465  | 27.1653 | 27.1735 | 27.5986 |
| erage sigm   | P49988 | rpoN   | 16 | 46.3 | 56.054 | 153.96 | 3.95E+09 | 91   | 497 | 26.3895 | 26.4654 | 26.6812 | 26.1065 | 26.2713 | 26.4136 | 26.3453 | 26.2646 |
| sphoribios   | P50587 | pyrE   | 12 | 62.4 | 23.32  | 144.49 | 1.15E+10 | 112  | 213 | 28.837  | 28.5314 | 28.6053 | 28.4572 | 28.5175 | 28.3358 | 28.1515 | 28.0873 |
| onuclease    | P50597 | rph    | 5  | 34.7 | 25.654 | 97.391 | 3.19E+09 | 44   | 239 | 27.8991 | 27.9897 | 27.9909 | 28.1215 | 27.3831 | 27.6121 | 27.672  | 27.4635 |
| 'rotein Toll | P50601 | tolB   | 29 | 75.7 | 47.752 | 302.81 | 3.21E+10 | 239  | 432 | 28.5544 | 28.8549 | 28.975  | 28.5925 | 29.0387 | 28.9936 | 29.2456 | 28.8946 |
| 'osuccinat   | P50987 | argH   | 17 | 41.2 | 51.64  | 150.89 | 8.08E+09 | 120  | 464 | 27.0488 | 27.0375 | 26.84   | 27.0116 | 27.2465 | 27.3503 | 27.1678 | 27.3124 |
| stance ope   | P52003 | mexR   | 4  | 38.1 | 16.964 | 14.821 | 3.51E+08 | 17   | 147 | 24.821  | 24.2237 | 23.2972 | 24.7166 | 24.085  | 25.0579 | 24.3821 | 24.8923 |
| erage III su | P52024 | holB   | 5  | 25.9 | 35.746 | 35.435 | 2.35E+08 | 18   | 328 | 22.6922 | 24.0534 | 23.7723 | 22.4309 | 23.8644 | 24.0924 | 24.2575 | 24.3657 |
| osphate de   | P52111 | glpD   | 29 | 74.6 | 57.134 | 311.43 | 1.48E+10 | 218  | 512 | 27.9371 | 28.1015 | 28.0672 | 28.1111 | 28.1864 | 27.7911 | 27.9673 | 27.6615 |
| ] ADP-forr   | P53593 | sucC   | 24 | 64.4 | 41.542 | 323.31 | 2.76E+11 | 578  | 388 | 32.0321 | 32.1183 | 32.2942 | 31.8641 | 31.9316 | 32.0947 | 32.1651 | 31.8273 |
| ide dismut   | P53641 | sodB   | 10 | 66.3 | 21.351 | 135.96 | 3.56E+10 | 155  | 193 | 31.0503 | 30.1255 | 28.8081 | 30.8314 | 30.7924 | 30.9928 | 29.3704 | 30.6771 |
| moserine :   | P55218 | metZ   | 17 | 52.9 | 43.184 | 150.2  | 4.59E+09 | 91   | 403 | 26.8703 | 27.1382 | 26.8959 | 27.1478 | 27.2172 | 27.4049 | 27.1682 | 27.0001 |
| 'receptor-l  | P55222 | vfr    | 9  | 41.6 | 24.225 | 83.065 | 3.43E+09 | 65   | 214 | 26.5999 | 27.1609 | 26.5125 | 26.7419 | 26.531  | 26.6017 | 26.2286 | 26.5122 |
| ucleotide :  | P57112 | sthA   | 27 | 71.6 | 51.16  | 323.31 | 4.04E+10 | 297  | 464 | 28.6563 | 28.8003 | 28.5731 | 28.5256 | 29.1376 | 29.0259 | 29.0357 | 28.8405 |
| oribonucle   | P57665 | orn    | 10 | 41.7 | 20.826 | 69.64  | 3.34E+09 | 89   | 180 | 26.8874 | 26.8006 | 26.4761 | 26.8376 | 26.4852 | 26.4122 | 26.4102 | 26.6157 |
| le thiol per | P57668 | tpx    | 14 | 91.5 | 17.234 | 289.98 | 4.1E+10  | 163  | 165 | 29.6357 | 29.4479 | 29.0694 | 29.7033 | 29.7011 | 29.6249 | 29.705  | 29.5345 |
| I4-phosph    | P57707 | ispD   | 6  | 41.5 | 25.613 | 67.942 | 1.07E+09 | 45   | 234 | 25.4297 | 25.3592 | 25.3293 | 25.513  | 25.5033 | 25.5134 | 25.7006 | 25.7722 |
| e O-acetyl   | P57714 | metX   | 8  | 38.3 | 41.834 | 87.004 | 1.37E+09 | 37   | 379 | 25.1319 | 25.6302 | 25.1646 | 25.3094 | 25.7633 | 25.8881 | 25.5024 | 25.9779 |
| i Initiation | P65116 | infA   | 4  | 69.4 | 8.3025 | 114.05 | 2.99E+10 | 80   | 72  | 30.5963 | 30.7656 | 29.5996 | 30.7727 | 30.9645 | 30.931  | 30.6957 | 30.7782 |
| type flagell | P72151 | flhC   | 2  | 8.2  | 49.242 | 85.116 | 6.63E+10 | 56   | 488 | 32.1246 | 32.2569 | 32.1697 | 32.4051 | 31.8739 | 31.7392 | 31.6461 | 31.7386 |
| douridine :  | P72154 | truD   | 13 | 57.2 | 33.41  | 193.33 | 8.61E+09 | 120  | 304 | 27.7963 | 27.8804 | 27.8995 | 27.6695 | 27.4782 | 27.7457 | 27.5364 | 27.6631 |
| idazole rib  | P72157 | purE   | 8  | 62.6 | 16.889 | 95.159 | 1.68E+10 | 104  | 163 | 28.6283 | 28.2238 | 27.4658 | 28.5285 | 28.5161 | 28.9047 | 28.739  | 28.9452 |
| idazole rib  | P72158 | purK   | 7  | 33.9 | 38.495 | 66.937 | 9.6E+09  | 84   | 360 | 27.6622 | 27.6522 | 27.9935 | 28.1488 | 27.9299 | 27.9299 | 27.8551 | 27.8208 |
| hydroxoru    | P72170 | pyrC   | 21 | 66.1 | 38.406 | 215.34 | 1.38E+10 | 168  | 348 | 28.085  | 27.68   | 26.7119 | 28.1111 | 27.813  | 27.9663 | 27.3284 | 27.9734 |
| e aminotra   | P72173 | aspC   | 21 | 73.9 | 43.315 | 256.91 | 1.47E+10 | 153  | 398 | 27.5596 | 27.8477 | 27.4978 | 27.5607 | 27.8423 | 27.8506 | 27.7698 | 28.254  |
| .system pr   | P72174 | uvrB   | 23 | 51.2 | 76.065 | 169.82 | 2.43E+09 | 94   | 670 | 26.3406 | 26.3342 | 2       |         |         |         |         |         |

|              |        |        |    |      |        |        |          |      |     |         |         |         |         |         |         |         |         |
|--------------|--------|--------|----|------|--------|--------|----------|------|-----|---------|---------|---------|---------|---------|---------|---------|---------|
| thase subu   | Q9HT17 | atpH   | 14 | 78.7 | 19.26  | 296.89 | 7.38E+10 | 279  | 178 | 31.1266 | 30.7251 | 30.1797 | 30.9828 | 30.8262 | 31.0266 | 30.9044 | 31.1082 |
| hase subu    | Q9HT18 | atpA   | 33 | 63.2 | 55.393 | 323.31 | 3.8E+11  | 549  | 514 | 32.2536 | 32.3482 | 32.5052 | 32.2975 | 32.5686 | 32.4404 | 32.3443 | 32.2292 |
| hase gamr    | Q9HT19 | atpG   | 18 | 75.2 | 31.553 | 204.63 | 4.8E+10  | 192  | 286 | 29.6419 | 29.6566 | 29.7396 | 29.8371 | 29.9054 | 29.5767 | 29.7256 |         |
| thase subu   | Q9HT20 | atpD   | 42 | 93.4 | 49.499 | 323.31 | 5.04E+11 | 1207 | 458 | 32.1375 | 32.1866 | 32.4035 | 31.9725 | 32.2967 | 32.2543 | 32.254  | 32.2163 |
| thase epsil  | Q9HT21 | atpC   | 6  | 49.6 | 14.726 | 47.804 | 2.04E+10 | 62   | 141 | 29.9932 | 29.5624 | 29.4187 | 30.0279 | 29.9341 | 30.0196 | 29.8418 | 29.9441 |
| 4-acetyltrai | Q9HT22 | glmU   | 21 | 54   | 48.851 | 236.84 | 1.32E+10 | 173  | 454 | 28.1571 | 28.4297 | 28.549  | 27.9909 | 28.3424 | 28.4235 | 28.519  | 28.5379 |
|              | Q9HT24 | glmR   | 6  | 45.9 | 28.151 | 16.416 | 2.74E+08 | 16   | 257 | 24.5808 | 24.204  | 23.1354 | 24.1901 | 24.4986 | 24.13   | 24.7524 | 24.2203 |
| hphate ami   | Q9HT25 | glmS   | 19 | 44.8 | 66.294 | 151.51 | 2.93E+09 | 106  | 611 | 25.7446 | 26.0733 | 25.6343 | 26.112  | 26.2324 | 26.3105 | 26.2957 | 26.6103 |
|              | Q9HT52 | PA5521 | 9  | 55.2 | 26.894 | 102.62 | 4.83E+09 | 73   | 252 | 28.2107 | 28.2953 | 28.3273 | 28.0291 | 27.9366 | 28.1843 | 28.2819 | 28.2563 |
|              | Q9HT54 | PA5519 | 3  | 23.4 | 21.215 | 7.2815 | 3.52E+08 | 14   | 188 | 25.5799 | 25.5822 | 23.4511 | 25.2401 | 24.4557 | 24.5501 | 24.4323 | 24.2227 |
| oxamine k    | Q9HT57 | pdxY   | 9  | 46.5 | 31.285 | 42.013 | 2.51E+09 | 71   | 288 | 26.5335 | 25.9631 | 24.9869 | 26.53   | 26.2187 | 26.2643 | 25.7182 | 26.168  |
|              | Q9HT62 | mifR   | 17 | 49.2 | 49.629 | 60.286 | 1.04E+09 | 54   | 447 | 25.5474 | 25.3996 | 25.4032 | 25.2613 | 25.3463 | 25.4376 | 25.7667 | 25.534  |
|              | Q9HT64 | PA5509 | 10 | 59   | 24.841 | 67.174 | 2.7E+09  | 65   | 222 | 26.6761 | 26.7528 | 26.2943 | 26.7858 | 26.1591 | 26.5651 | 26.2166 | 26.3056 |
|              | Q9HT65 | PA5508 | 9  | 44   | 47.9   | 79.352 | 1.62E+09 | 60   | 443 | 25.8994 | 25.9395 | 25.6068 | 25.5927 | 25.5435 | 25.9775 | 25.947  | 26.1048 |
|              | Q9HT66 | PA5507 | 14 | 73.7 | 24.262 | 249.42 | 2.75E+10 | 169  | 217 | 29.7803 | 29.7678 | 29.9442 | 29.7571 | 29.2557 | 29.3126 | 29.523  | 29.3035 |
|              | Q9HT67 | PA5506 | 10 | 42.5 | 32.143 | 102.97 | 1.26E+09 | 38   | 285 | 26.234  | 26.1002 | 26.5002 | 26.3047 | 25.8348 | 26.0975 | 26.1879 | 25.8634 |
|              | Q9HT68 | PA5505 | 12 | 55   | 28.065 | 89.906 | 3.12E+09 | 64   | 260 | 26.7432 | 26.8157 | 22.4624 | 26.4164 | 26.6683 | 27.4553 | 26.9913 | 27.1719 |
| : ATP-bindi  | Q9HT70 | metN2  | 11 | 65.4 | 36.759 | 95.41  | 2.44E+09 | 54   | 335 | 26.4108 | 26.7341 | 26.6902 | 26.1322 | 26.2825 | 26.6525 | 26.5936 | 26.702  |
|              | Q9HT74 | np20   | 4  | 49.1 | 18.216 | 47.763 | 1.39E+09 | 25   | 167 | 26.3981 | 26.7329 | 26.3729 | 26.3889 | 26.3872 | 26.4044 | 26.2318 | 26.2054 |
| ly polymera  | Q9HT80 | poIA   | 47 | 66.3 | 99.792 | 323.31 | 1.32E+10 | 303  | 913 | 26.9243 | 27.0243 | 27.0664 | 26.669  | 26.8017 | 27.0523 | 27.0393 | 27.0955 |
| P-binding ;  | Q9HT81 | hsp70  | 9  | 57.7 | 23.786 | 55.469 | 2.3E+09  | 56   | 215 | 26.4199 | 26.6561 | 26.3538 | 26.3955 | 26.3414 | 26.5394 | 26.5498 | 26.3937 |
|              | Q9HT98 | PA5472 | 12 | 66.5 | 29.148 | 85.572 | 6.63E+09 | 101  | 266 | 28.5093 | 28.1881 | 27.3568 | 28.5083 | 27.3204 | 27.9172 | 27.0698 | 27.6174 |
|              | Q9HTC5 | PA5441 | 23 | 50.2 | 80.036 | 177.94 | 4.57E+09 | 137  | 733 | 26.348  | 26.2322 | 26.27   | 26.067  | 26.2591 | 26.4235 | 26.4841 | 26.1959 |
|              | Q9HTC8 | PA5438 | 10 | 51.5 | 31.68  | 53.73  | 1.94E+09 | 44   | 293 | 26.3913 | 26.7433 | 26.6044 | 25.9537 | 26.4836 | 26.5086 | 26.3851 | 26.8087 |
|              | Q9HTD0 | PA5436 | 21 | 55.6 | 51.848 | 144.49 | 2.93E+09 | 121  | 471 | 25.9198 | 26.1001 | 25.9386 | 25.9655 | 25.8017 | 25.6046 | 25.5151 | 25.7449 |
| ite ammon    | Q9HTD7 | aspA   | 19 | 66.9 | 51.069 | 289.56 | 4.96E+10 | 254  | 474 | 30.4845 | 30.2969 | 30.6316 | 30.2202 | 30.1475 | 30.679  | 30.5313 | 30.1835 |
|              | Q9HTD8 | PA5428 | 8  | 43   | 33.477 | 54.079 | 7.45E+08 | 45   | 302 | 24.8457 | 25.0438 | 24.806  | 25.1108 | 25.3718 | 25.2199 | 25.1047 | 24.6869 |
|              | Q9HTD1 | PA5423 | 3  | 28.6 | 20.002 | 16.028 | 6.55E+08 | 22   | 182 | 25.3608 | 25.5705 | 24.894  | 25.5379 | 25.0141 | 25.542  | 25.0018 | 24.9445 |
|              | Q9HTD2 | PA5422 | 12 | 56.9 | 36.139 | 64.409 | 1.52E+09 | 54   | 318 | 25.2322 | 25.2292 | 25.5164 | 24.9251 | 24.9802 | 25.2459 | 25.6066 | 25.2222 |
|              | Q9HTF0 | PA5414 | 4  | 31.5 | 22.547 | 13.927 | 2.22E+08 | 15   | 213 | 24.1005 | 24.1723 | 23.7623 | 23.9498 | 24.0559 | 23.8864 | 23.8679 | 24.2854 |
| ty L-theor   | Q9HTF1 | ItaE   | 13 | 52.6 | 38.213 | 200.86 | 1.56E+10 | 119  | 346 | 29.1398 | 28.9947 | 28.934  | 28.9835 | 29.0562 | 29.0753 | 29.0471 | 28.9917 |
| ision prote  | Q9HTF7 | PA5407 | 2  | 32.3 | 10.292 | 24.985 | 4.73E+08 | 13   | 96  | 25.578  | 25.3192 | 23.4621 | 25.6103 | 25.0812 | 25.2892 | 25.3481 | 25.3962 |
|              | Q9HTF8 | PA5406 | 2  | 31.8 | 12.445 | 47.35  | 2.85E+09 | 27   | 110 | 28.4184 | 25.9046 | 25.3522 | 28.2008 | 25.7026 | 28.309  | 25.7537 | 27.7063 |
|              | Q9HTH8 | PA5376 | 10 | 36   | 43.721 | 30.957 | 9.64E+08 | 44   | 392 | 25.0393 | 25.415  | 25.2245 | 24.9777 | 25.0841 | 24.8745 | 25.1679 | 25.0451 |
| scriptional  | Q9HTJ0 | betI   | 5  | 32.5 | 21.861 | 25.854 | 4.24E+08 | 15   | 197 | 24.5652 | 24.2246 | 24.6951 | 24.687  | 24.1801 | 24.5664 | 24.606  | 24.5109 |
| betaine alk  | Q9HTJ1 | betB   | 16 | 57.3 | 53.332 | 172.78 | 7.34E+09 | 114  | 490 | 27.5678 | 27.4798 | 27.4947 | 27.316  | 27.0678 | 27.5722 | 27.894  | 27.4495 |
| ent choline  | Q9HTJ2 | betA   | 20 | 51.7 | 61.836 | 115.72 | 1.52E+09 | 96   | 561 | 25.6123 | 25.407  | 25.4939 | 25.7312 | 25.3958 | 25.673  | 25.9629 | 25.5498 |
|              | Q9HTJ3 | PA5371 | 5  | 56.7 | 14.555 | 78.361 | 1.5E+09  | 45   | 134 | 26.7459 | 26.3216 | 26.7425 | 26.6847 | 27.0754 | 26.8753 | 26.4243 | 26.4243 |
|              | Q9HTJ6 | PA5364 | 12 | 47.7 | 32.401 | 91.821 | 1.74E+09 | 55   | 300 | 26.0565 | 25.9566 | 26.1874 | 25.6665 | 25.5551 | 25.4141 | 25.7162 | 25.601  |
| in-NAD(+) )  | Q9HTK9 | alkT   | 15 | 67.2 | 40.617 | 180.69 | 4.67E+09 | 110  | 384 | 26.891  | 27.1422 | 26.9146 | 26.8081 | 27.0727 | 27.1808 | 27.2907 | 27.2243 |
|              | Q9HTL4 | oxyR   | 18 | 75.2 | 34.295 | 159.4  | 7.34E+09 | 119  | 310 | 27.5217 | 27.7776 | 27.8056 | 27.2644 | 27.1539 | 27.3483 | 27.5398 | 27.4579 |
|              | Q9HTL5 | PA5343 | 9  | 46.3 | 30.778 | 82.856 | 3.07E+09 | 74   | 283 | 26.6385 | 26.6955 | 26.848  | 26.6079 | 26.2448 | 26.5372 | 26.5953 | 26.4665 |
| ly polymera  | Q9HTL9 | PA5339 | 9  | 93.7 | 13.609 | 86.13  | 7.25E+10 | 211  | 126 | 31.0343 | 30.6899 | 29.9581 | 31.244  | 30.6614 | 31.4259 | 30.9285 | 31.0712 |
| anylate kin  | Q9HTM1 | rpoZ   | 7  | 44.3 | 9.748  | 120.1  | 3.67E+10 | 84   | 88  | 31.2695 | 30.6933 | 29.4476 | 30.8714 | 31.454  | 30.6659 | 31.3258 |         |
|              | Q9HTM2 | gmk    | 10 | 59.6 | 23.102 | 115.05 | 9.08E+09 | 90   | 203 | 28.3281 | 28.4603 | 28.2486 | 28.5273 | 28.3562 | 28.3051 | 27.8994 | 28.0341 |
|              | Q9HTM3 | PA5335 | 12 | 39.7 | 31.708 | 69.613 | 3.99E+09 | 49   | 287 | 27.6353 | 27.6741 | 28.0162 | 27.515  | 27.4812 | 27.7767 | 27.8552 |         |
|              | Q9HTM5 | PA5330 | 8  | 50.7 | 22.434 | 100.12 | 2.37E+09 | 48   | 205 | 27.3104 | 26.976  | 24.9325 | 27.3274 | 27.4014 | 27.3798 | 26.6495 | 27.1422 |
| glutamate    | Q9HTN2 | argB   | 19 | 83.7 | 31.849 | 231.79 | 2.7E+10  | 195  | 301 | 28.8978 | 28.9063 | 29.0277 | 29.0033 | 29.1962 | 29.2301 | 29.417  | 29.1292 |
| hosphate r   | Q9HTN3 | dut    | 4  | 56.3 | 15.92  | 74.429 | 3.02E+09 | 29   | 151 | 27.7815 | 27.2934 | 26.6701 | 27.9792 | 27.0288 | 27.5497 | 26.947  | 27.3942 |
|              | Q9HTN4 | coaC   | 17 | 72.9 | 43.133 | 235.34 | 8.2E+09  | 118  | 402 | 28.0752 | 27.9426 | 28.2783 | 27.861  | 27.8377 | 27.7568 | 27.7283 | 27.6621 |
| osomal pro   | Q9HTN8 | rpmB   | 5  | 35.9 | 9.0655 | 18.539 | 1.69E+10 | 28   | 78  | 30.4977 | 31.2329 | 30.278  | 30.5695 | 31.2434 | 31.057  | 30.8367 | 30.718  |
| osomal pro   | Q9HTN9 | rpmG   | 3  | 35.3 | 6.045  | 61.759 | 7.05E+10 | 58   | 51  | 32.2364 | 32.8605 | 32.8177 | 31.7571 | 32.6726 | 32.6413 | 32.8667 | 32.6408 |
|              | Q9HTP1 | PA5313 | 5  | 20.7 | 48.347 | 13.075 | 2.71E+08 | 15   | 444 | 22.9366 | 24.0365 | 22.8445 | 23.7952 | 24.5796 | 24.3133 | 24.4329 | 22.3614 |
|              | Q9HTP2 | PA5312 | 29 | 71   | 53.143 | 323.31 | 6.3E+10  | 352  | 497 | 30.476  | 30.6466 | 30.9335 | 30.1439 | 30.2352 | 30.21   | 30.2902 | 30.2312 |
|              | Q9HTP5 | PA5309 | 12 | 45.1 | 47.701 | 81.241 | 2.4E+09  | 78   | 439 | 26.8946 | 27.1381 | 27.3103 | 26.9544 | 26.8206 | 26.9509 | 26.9342 | 26.7685 |
|              | Q9HTP6 | lrp    | 6  | 46.3 | 18.868 | 14.455 | 7.19E+08 | 25   | 162 | 25.0981 | 25.5516 | 25.2777 | 25.0407 | 25.1135 | 24.9331 | 24.9343 | 24.8845 |
|              | Q9HTP9 | PA5305 | 4  | 56.1 | 11.527 | 69.895 | 2.18E+09 | 35   | 114 | 28.0072 | 25.1341 | 25.3821 | 27.6325 | 24.4817 | 27.1892 | 24.4967 | 26.3214 |
| racemase, i  | Q9HTQ1 | PA5303 | 4  | 47   | 13.019 | 27.919 | 3.15E+08 | 20   | 117 | 25.2149 | 24.7445 | 23.1526 | 25.2479 | 24.1741 | 22.2826 | 23.8404 | 24.204  |
|              | Q9HTQ2 | dadX   | 12 | 43.1 | 38.914 | 108.76 | 5.46E+09 | 59   | 357 | 27.5006 | 27.6367 | 27.4717 | 27.6471 | 27.5785 | 27.4558 | 27.431  | 27.1706 |
|              | Q9HTQ3 | PA5301 | 10 | 67   | 19.962 | 79.777 | 5.01E+09 | 57   | 182 | 26.9461 | 27.2195 | 27.1749 | 26.9271 | 26.9839 | 27.0358 | 26.9238 | 26.8733 |
|              | Q9HTQ4 | cycB   | 9  | 58.1 | 13.458 | 77.491 | 1.52E+10 | 83   | 136 | 29.9998 | 27.9568 | 27.4377 | 29.9478 | 28.9435 | 30.1712 | 28.3442 | 29.6538 |
| hosphoribos  | Q9HTQ6 | xpt    | 7  | 36.8 | 20.607 | 40.98  | 4.84E+09 | 56   | 190 | 28.0463 | 28.4623 | 28.6061 | 28.2499 | 27.9429 | 28.0363 | 28.1021 | 27.9633 |
|              | Q9HTR5 | PA5289 | 5  | 66.3 | 9.5239 | 35.643 | 1.42E+09 | 30   | 86  | 26.7214 | 26.1877 | 25.5321 | 26.9113 | 25.9068 | 26.6046 | 25.6633 | 26.4515 |
|              | Q9HTR6 | glmK   | 11 | 76.8 | 12.828 | 108.3  | 3.31E+10 | 122  | 112 | 30.0238 | 30.1334 | 29.5724 | 30.2454 | 29.778  | 29.6832 | 29.9063 | 29.6666 |
|              | Q9HTR9 | PA5285 | 7  | 81   | 11.168 | 115.39 | 2.7E+10  | 77   | 109 | 30.0318 | 29.4038 | 29.9109 | 30.3001 | 29.8318 | 30.1388 | 28.4855 | 30.0864 |
| 'rotein Cya  | Q9HTS5 | cysY   | 5  | 58.3 | 11.9   |        |          |      |     |         |         |         |         |         |         |         |         |

|              |        |        |    |      |        |        |          |     |     |         |         |         |         |         |         |         |         |
|--------------|--------|--------|----|------|--------|--------|----------|-----|-----|---------|---------|---------|---------|---------|---------|---------|---------|
| -bisphosph   | Q9HU73 | fbp    | 15 | 66.7 | 37.216 | 249.53 | 2.21E+10 | 168 | 336 | 28.8834 | 29.0109 | 29.1598 | 28.8781 | 28.6859 | 28.8997 | 29.0153 | 28.7904 |
| -iminopep    | Q9HUA3 | PA5080 | 19 | 77.7 | 36.515 | 201.62 | 1.47E+10 | 156 | 323 | 28.1669 | 28.3446 | 28.4348 | 28.112  | 27.9136 | 27.8596 | 27.8968 | 27.649  |
| osynthesis   | Q9HUA5 | oggG   | 28 | 60.4 | 59.476 | 236.79 | 4.45E+10 | 287 | 525 | 28.8492 | 28.9787 | 29.0976 | 28.7645 | 28.8772 | 28.8577 | 28.954  | 28.8471 |
| hesis gluco  | Q9HUA6 | oggH   | 6  | 13.9 | 96.994 | 35.369 | 4.62E+08 | 32  | 861 | 23.5472 | 24.2931 | 22.0489 | 24.2883 | 24.8145 | 24.5037 | 24.5784 | 24.7506 |
|              | Q9HUA7 | PA5076 | 20 | 74.8 | 29.736 | 222.4  | 2.54E+10 | 179 | 266 | 28.8839 | 28.7491 | 28.9401 | 28.8006 | 28.9548 | 28.9096 | 28.695  | 28.8292 |
|              | Q9HUA9 | PA5074 | 3  | 23.8 | 27.075 | 15.223 | 3.11E+08 | 20  | 244 | 24.2669 | 23.784  | 24.7014 | 24.1553 | 24.3261 | 24.2756 | 24.3748 | 24.1977 |
| yl-ATP pyr   | Q9HUB6 | hisE   | 3  | 21.6 | 12.038 | 10.701 | 7.52E+08 | 18  | 111 | 24.2619 | 23.6646 | 23.5931 | 26.6819 | 26.0771 | 26.1854 | 23.6158 | 26.4058 |
| yl-AMP cy    | Q9HUB7 | hisI   | 6  | 74.6 | 15.375 | 51.481 | 3.79E+09 | 47  | 134 | 27.1846 | 26.9969 | 26.2392 | 27.001  | 27.0735 | 26.9374 | 26.668  | 26.8978 |
|              | Q9HUB9 | PA5064 | 3  | 18.8 | 22.767 | 24.017 | 6.83E+08 | 24  | 208 | 25.1296 | 25.1846 | 25.7669 | 26.0839 | 25.5247 | 25.6091 | 25.5366 | 25.6642 |
| biosynthesi  | Q9HUC0 | ubiE   | 14 | 66.8 | 28.254 | 161.14 | 1.18E+10 | 129 | 256 | 28.0564 | 28.3541 | 28.4844 | 27.9508 | 27.7225 | 27.7956 | 27.8925 | 27.6719 |
|              | Q9HUC1 | PA5062 | 3  | 44.8 | 9.8063 | 20.871 | 1.21E+09 | 26  | 91  | 26.4972 | 26.0535 | 25.4916 | 26.6299 | 25.8866 | 26.2258 | 25.5124 | 25.8794 |
|              | Q9HUC3 | phaF   | 5  | 22.7 | 30.577 | 11.229 | 8.18E+08 | 22  | 309 | 23.2357 | 25.4232 | 24.476  | 25.4459 | 25.8517 | 25.7088 | 25.7567 | 25.8276 |
| rotease AT   | Q9HUC5 | hslU   | 29 | 52.6 | 50.082 | 191.17 | 2.66E+10 | 211 | 447 | 28.9072 | 28.9994 | 29.2232 | 28.7692 | 28.6561 | 28.8264 | 28.8154 | 28.8133 |
| nt protease  | Q9HUC6 | hslV   | 5  | 54.8 | 18.785 | 106.5  | 4.46E+09 | 46  | 177 | 27.7038 | 27.2111 | 27.4217 | 27.5286 | 27.942  | 28.0618 | 27.832  | 27.8496 |
| ine-tRNA I   | Q9HUC8 | argS   | 22 | 43.8 | 65.199 | 164.8  | 8.04E+09 | 147 | 587 | 26.8229 | 27.2346 | 26.5565 | 27.1037 | 26.9764 | 26.7595 | 26.4557 | 26.8805 |
| isomal pro   | Q9HUD0 | rpmE   | 6  | 74.6 | 7.9201 | 85.533 | 8.03E+10 | 145 | 71  | 32.1242 | 31.5366 | 30.9521 | 32.5271 | 31.6811 | 31.8053 | 31.7501 | 32.1638 |
|              | Q9HUD3 | PA5046 | 39 | 85.3 | 45.428 | 323.31 | 3.06E+11 | 640 | 422 | 32.0858 | 31.9537 | 32.1641 | 32.1078 | 32.438  | 32.2105 | 32.3612 | 32.2145 |
|              | Q9HUD4 | PA5037 | 15 | 44.6 | 57.446 | 117.56 | 1.74E+09 | 64  | 551 | 25.6587 | 25.8396 | 25.3109 | 25.8925 | 26.0967 | 25.6803 | 25.4936 | 25.5879 |
|              | Q9HUE1 | PA5028 | 11 | 73.7 | 28.643 | 56.972 | 1.37E+09 | 42  | 255 | 26.2832 | 26.3132 | 26.2991 | 26.0207 | 25.7951 | 26.3597 | 26.2127 | 26.0355 |
| te subunit i | Q9HUF0 | rmlJ   | 8  | 42.8 | 31.882 | 33.469 | 3.53E+08 | 27  | 278 | 24.2069 | 24.6368 | 23.0474 | 24.2996 | 24.2848 | 24.3331 | 24.6627 | 24.9247 |
| ne sulfoxid  | Q9HUF1 | mscA   | 9  | 59.5 | 23.517 | 63.968 | 8.32E+09 | 77  | 215 | 28.7689 | 28.6998 | 28.2155 | 28.8385 | 28.4556 | 28.4098 | 28.2873 | 28.1396 |
|              | Q9HUF5 | waaC   | 4  | 20.6 | 39.746 | 14.269 | 3.66E+08 | 24  | 355 | 24.9153 | 24.6778 | 22.4226 | 24.7111 | 24.6631 | 24.7151 | 24.7774 | 24.7774 |
|              | Q9HUF6 | waaG   | 4  | 23.3 | 42.156 | 14.695 | 1.64E+08 | 17  | 373 | 22.4884 | 23.0135 | 22.7593 | 24.6922 | 24.3921 | 23.8628 | 24.3697 | 24.5959 |
|              | Q9HUF8 | PA5007 | 11 | 70.2 | 29.414 | 48.124 | 1.06E+09 | 66  | 252 | 25.0057 | 25.0595 | 25.3632 | 24.7231 | 24.6934 | 24.8692 | 25.0831 | 25.0215 |
|              | Q9HUG0 | PA5005 | 18 | 49.6 | 66.079 | 130.26 | 4.33E+09 | 85  | 585 | 26.8913 | 27.4599 | 26.221  | 27.2533 | 27.2897 | 27.0622 | 26.8353 | 27.5922 |
|              | Q9HUG1 | PA5004 | 8  | 33.6 | 42.197 | 35.419 | 4.88E+08 | 27  | 378 | 24.2757 | 24.201  | 24.2392 | 24.1045 | 24.6545 | 24.5678 | 24.2855 | 24.9596 |
|              | Q9HUG2 | PA5003 | 6  | 37.2 | 33.849 | 60.434 | 3.22E+08 | 18  | 298 | 23.0818 | 25.0941 | 22.9736 | 23.8132 | 25.2816 | 23.6081 | 25.0303 | 25.1874 |
|              | Q9HUG7 | PA4998 | 5  | 28.2 | 24.985 | 6.3834 | 3.36E+08 | 18  | 216 | 24.0819 | 24.3547 | 24.3637 | 23.321  | 24.8569 | 23.9869 | 23.764  | 24.0156 |
| inding/per   | Q9HUG8 | msbA   | 5  | 14.3 | 66.431 | 23.945 | 2.05E+08 | 14  | 603 | 23.2395 | 23.8704 | 23.8677 | 23.3638 | 24.2674 | 23.8133 | 23.9488 | 24.3575 |
| ate adeny    | Q9HUG9 | hldE   | 21 | 57.4 | 50.348 | 203.61 | 1.26E+10 | 151 | 474 | 29.7257 | 28.0054 | 28.0267 | 27.6353 | 27.8479 | 27.9288 | 27.8318 | 27.8245 |
|              | Q9HUH3 | PA4992 | 12 | 59.6 | 29.03  | 113.95 | 1.65E+09 | 50  | 270 | 25.8533 | 26.3421 | 26.2961 | 25.9903 | 26.291  | 26.0689 | 26.2345 | 25.6675 |
|              | Q9HUH4 | PA4991 | 15 | 61.1 | 42.109 | 136.15 | 6.19E+09 | 78  | 391 | 28.7263 | 28.7697 | 28.7516 | 28.9039 | 28.8604 | 28.7573 | 28.712  | 28.5035 |
|              | Q9HUI1 | PA4974 | 19 | 48.3 | 53.405 | 142.42 | 2.68E+09 | 101 | 482 | 25.5088 | 25.3827 | 25.1288 | 25.5135 | 26.0505 | 25.4303 | 26.1951 | 25.5583 |
|              | Q9HUI4 | aspP   | 10 | 59   | 23.133 | 112.02 | 3.63E+09 | 86  | 205 | 26.7356 | 26.76   | 26.6672 | 26.6224 | 26.6834 | 26.8573 | 26.5999 | 26.754  |
| ophosphat    | Q9HUI6 | cpdA   | 9  | 57.7 | 30.516 | 101.6  | 1.37E+09 | 46  | 272 | 26.118  | 24.7087 | 23.3855 | 25.9912 | 25.3947 | 26.21   | 23.8071 | 26.2047 |
|              | Q9HUI7 | PA4968 | 7  | 60.7 | 22.645 | 36.282 | 1.14E+09 | 54  | 206 | 25.2479 | 25.3825 | 25.3567 | 25.1375 | 25.3134 | 25.388  | 25.21   | 25.2144 |
| somerase 4   | Q9HUI8 | parE   | 28 | 56.8 | 69.178 | 140.72 | 4.48E+09 | 137 | 629 | 26.1476 | 26.2396 | 26.3457 | 26.0691 | 26.6046 | 26.5995 | 26.7378 | 26.7146 |
|              | Q9HUI9 | PA4966 | 13 | 55.8 | 36.483 | 39.519 | 1.41E+09 | 48  | 337 | 25.4488 | 25.4893 | 24.3892 | 25.4468 | 25.3496 | 25.2019 | 25.4072 | 25.0472 |
| somerase 4   | Q9HUK1 | parC   | 28 | 52.1 | 83.364 | 187.66 | 7.97E+09 | 144 | 754 | 28.099  | 28.5854 | 27.9159 | 28.5382 | 28.9034 | 28.7769 | 28.6353 | 28.9356 |
|              | Q9HUK5 | PA4960 | 8  | 24.7 | 46.438 | 40.507 | 1.49E+09 | 33  | 429 | 26.1212 | 26.3729 | 26.2325 | 26.0786 | 26.1876 | 26.1496 | 26.0284 | 26.2819 |
|              | Q9HUK6 | flmX   | 4  | 9.8  | 75.992 | 60.298 | 3.45E+08 | 24  | 691 | 24.0813 | 24.7139 | 24.211  | 24.0964 | 24.9492 | 24.9443 | 24.1765 | 24.7108 |
|              | Q9HUK7 | PA4958 | 20 | 62.6 | 67.828 | 102.32 | 2.3E+09  | 81  | 607 | 25.4592 | 25.805  | 25.2907 | 25.6787 | 25.794  | 25.7939 | 25.7157 | 25.8963 |
| furtransfer  | Q9HUK9 | rhdA   | 12 | 70.8 | 29.391 | 101.1  | 8.53E+09 | 82  | 271 | 27.6965 | 27.7199 | 27.4959 | 27.8369 | 27.8143 | 27.7798 | 27.6486 | 27.6831 |
| ne biogene   | Q9HUL3 | rsfA   | 12 | 54.3 | 37.078 | 102.02 | 2.29E+09 | 76  | 339 | 26.1858 | 26.1198 | 26.4147 | 26.0942 | 26.1339 | 26.1447 | 25.8793 | 26.0586 |
|              | Q9HUL6 | PA4948 | 4  | 40.6 | 16.495 | 34.079 | 4.89E+08 | 16  | 155 | 25.2885 | 23.8008 | 24.7105 | 24.9338 | 23.1509 | 22.2817 | 25.4942 | 25.1286 |
|              | Q9HUL7 | amiB   | 15 | 49.1 | 50.683 | 131.09 | 3.62E+09 | 89  | 475 | 26.7898 | 27.0027 | 27.2075 | 26.8009 | 26.6611 | 26.8403 | 26.7754 | 26.6186 |
| ch repair r  | Q9HUL8 | mutL   | 8  | 28   | 69.747 | 67.303 | 8.33E+08 | 41  | 633 | 24.6618 | 25.1702 | 25.0288 | 24.9234 | 24.9962 | 25.088  | 25.2089 | 25.7971 |
| TPase Hfd    | Q9HUM1 | hflX   | 15 | 52   | 48.607 | 111.38 | 1.47E+09 | 71  | 433 | 26.0698 | 25.7954 | 26.1644 | 26.0256 | 25.5154 | 25.8955 | 25.94   | 26.0935 |
| transferasi  | Q9HUM5 | hisZ   | 15 | 48.7 | 42.546 | 159.99 | 9.89E+09 | 100 | 394 | 24.5523 | 28.614  | 28.7555 | 28.3414 | 28.6647 | 28.8764 | 28.9768 | 28.9622 |
| uccinate s   | Q9HUM6 | purA   | 28 | 65.8 | 46.814 | 323.31 | 5.67E+10 | 332 | 430 | 29.834  | 30.0598 | 29.9563 | 29.4988 | 29.6017 | 30.0108 | 29.9577 | 30.1832 |
| -2'-O-)-me   | Q9HUM8 | rhmB   | 11 | 60.1 | 27.081 | 58.602 | 2.91E+09 | 48  | 248 | 27.3305 | 27.6273 | 27.3545 | 27.277  | 27.2171 | 27.1841 | 27.328  | 27.2117 |
| osomal prc   | Q9HUM9 | rpsF   | 14 | 69.1 | 16.164 | 323.31 | 2.56E+11 | 488 | 139 | 32.3404 | 32.4029 | 32.0348 | 32.3267 | 32.4076 | 32.4105 | 32.3763 | 32.3138 |
| osomal prc   | Q9HUN0 | rpsI   | 4  | 40.8 | 8.8732 | 44.39  | 1.7E+10  | 50  | 76  | 29.6161 | 30.6092 | 29.8269 | 30.3993 | 30.9369 | 30.3557 | 30.609  | 30.6838 |
| osomal prc   | Q9HUN2 | rrlR   | 11 | 73   | 15.532 | 157.41 | 3.42E+11 | 700 | 148 | 33.046  | 32.9952 | 32.6082 | 33.2693 | 33.2052 | 33.1098 | 32.9286 | 33.0546 |
|              | Q9HUN3 | dnaB   | 24 | 67   | 51.589 | 156.35 | 2.64E+09 | 114 | 464 | 25.5624 | 25.6394 | 25.6064 | 25.2831 | 25.5276 | 25.6368 | 25.8832 | 26.0183 |
| cemase, bi   | Q9HUN4 | air    | 9  | 38.3 | 38.31  | 101.5  | 3.74E+09 | 83  | 358 | 26.8742 | 26.5871 | 26.3447 | 26.8092 | 26.7554 | 26.9096 | 26.4658 | 26.7073 |
| ndent NAD(-  | Q9HUP3 | nadE   | 17 | 82.9 | 29.696 | 294.38 | 2.11E+10 | 173 | 275 | 29.3738 | 29.1475 | 28.6598 | 29.328  | 28.6805 | 28.7813 | 28.5337 | 28.6603 |
| osphoribos   | Q9HUP4 | pncB1  | 14 | 46.6 | 46.094 | 84.819 | 1.19E+09 | 45  | 399 | 25.5604 | 25.5516 | 24.753  | 25.6792 | 25.4074 | 25.0559 | 25.3222 | 23.2228 |
|              | Q9HUP7 | PA4916 | 7  | 39.8 | 25.457 | 42.213 | 1.3E+09  | 47  | 231 | 26.1222 | 26.2857 | 26.0326 | 26.2337 | 25.797  | 25.9216 | 25.6219 | 25.7181 |
|              | Q9HUP6 | PA4907 | 12 | 65.2 | 27.384 | 210.65 | 1.09E+10 | 99  | 253 | 27.8426 | 28.0648 | 28.3713 | 27.7549 | 27.6927 | 27.7679 | 27.8418 | 27.6514 |
|              | Q9HUR4 | PA4899 | 5  | 23.9 | 52.697 | 37.003 | 4.41E+08 | 28  | 489 | 24.6047 | 24.5253 | 24.997  | 24.3407 | 24.0886 | 23.6949 | 24.2574 | 24.3025 |
|              | Q9HUS3 | desT   | 9  | 60.3 | 22.899 | 23.577 | 6.36E+08 | 36  | 209 | 24.6373 | 24.9449 | 25.1398 | 24.9398 | 24.9756 | 25.15   | 24.4905 | 23.648  |
|              | Q9HUT3 | PA4880 | 12 | 76.3 | 20.217 | 214.21 | 6.79E+09 | 85  | 177 | 27.6822 | 27.9877 | 27.6315 | 27.7715 | 28.1259 | 27.7787 | 27.8743 | 27.6125 |
|              | Q9HUT5 | PA4878 | 5  | 36.7 | 31.168 | 41.841 | 1.63E+09 | 24  | 270 | 27.4732 | 25.9983 | 23.4214 | 27.5707 | 26.2334 | 27.3196 | 26.1321 | 26.9995 |
| te subunit - | Q9HUV5 | urcC   | 6  | 23.1 | 60.61  | 84.805 | 3.62E+08 | 24  | 566 | 24.4837 | 24.2691 | 23.6761 | 24.6261 | 24.4941 | 24.6261 | 24.7652 | 24      |

|              |            |        |      |        |        |          |          |          |         |         |         |         |         |         |         |         |         |
|--------------|------------|--------|------|--------|--------|----------|----------|----------|---------|---------|---------|---------|---------|---------|---------|---------|---------|
| quinone c    | Q9HVFO     | PA4642 | 3    | 43.8   | 10.8   | 28.353   | 6.03E+09 | 40       | 96      | 28.6376 | 27.8802 | 26.7858 | 28.8302 | 28.0677 | 28.768  | 27.6693 | 28.6299 |
|              | Q9HVF1     | mqo2   | 14   | 37.9   | 55.498 | 97.961   | 7.44E+09 | 94       | 507     | 28.1857 | 28.1169 | 28.2765 | 27.6217 | 27.5942 | 28.048  | 28.1451 | 28.3209 |
|              | Q9HVF5     | PA4636 | 10   | 43     | 43.779 | 58.857   | 1.35E+09 | 47       | 386     | 25.427  | 25.6603 | 25.684  | 25.544  | 25.3673 | 25.8034 | 25.7775 | 26.27   |
|              | Q9HVF9     | PA4632 | 6    | 37.4   | 29.159 | 47.577   | 4.35E+08 | 26       | 273     | 24.3602 | 24.6154 | 22.3779 | 24.8521 | 24.9439 | 24.739  | 24.6423 | 24.9384 |
| il subunit r | Q9HVG0     | PA4631 | 9    | 46     | 37.263 | 69.493   | 7.56E+08 | 40       | 341     | 24.9257 | 25.1748 | 25.3078 | 25.1456 | 25.022  | 25.029  | 24.9823 | 24.9298 |
|              | Q9HVG4     | rsmc   | 7    | 28.9   | 35.937 | 22.733   | 3.28E+08 | 23       | 332     | 24.0825 | 24.5403 | 23.3347 | 23.7602 | 24.2637 | 23.9932 | 24.5269 | 24.0488 |
|              | Q9HVG5     | hprA   | 6    | 27.9   | 34.285 | 21.924   | 6.11E+08 | 33       | 323     | 24.681  | 25.1829 | 24.9974 | 24.5112 | 25.0377 | 25.3289 | 25.2466 | 25.182  |
|              | Q9HVI1     | PA4620 | 3    | 21.2   | 19.918 | 21.723   | 3.06E+08 | 21       | 179     | 24.6485 | 24.3471 | 22.5739 | 24.7894 | 24.6396 | 24.5979 | 24.0127 | 24.231  |
| Q9HVI2       | PA4619     | 11     | 41   | 44.71  | 141.03 | 1.16E+09 | 73       | 415      | 25.3598 | 25.2966 | 24.8355 | 25.4939 | 24.9744 | 24.7798 | 23.521  | 24.8332 |         |
|              | Q9HVI6     | PA4615 | 11   | 56.2   | 29.377 | 72.136   | 2.69E+09 | 75       | 258     | 25.5938 | 26.0019 | 25.9364 | 25.7254 | 26.1046 | 25.5655 | 25.8272 | 25.4933 |
|              | Q9HVI9     | PA4611 | 4    | 60.7   | 9.7158 | 55.783   | 7.69E+09 | 44       | 84      | 30.0844 | 28.9018 | 27.9325 | 30.7592 | 26.4082 | 28.9882 | 27.1323 | 28.4211 |
|              | Q9HVI5     | PA4604 | 4    | 20.1   | 37.256 | 14.443   | 2.89E+08 | 19       | 334     | 23.749  | 24.6567 | 24.57   | 22.9966 | 24.7302 | 24.6658 | 23.7713 | 24.7945 |
| xymethylt    | Q9HVI7     | glyA2  | 13   | 52.8   | 45.157 | 144.21   | 2.63E+10 | 149      | 417     | 30.8324 | 30.4392 | 30.7372 | 30.5818 | 31.0211 | 31.0615 | 30.9854 | 30.9339 |
|              | Q9HVI1     | PA4595 | 36   | 63.2   | 61.32  | 323.31   | 5.63E+10 | 356      | 554     | 29.6756 | 29.7911 | 29.8243 | 29.3769 | 29.6899 | 29.866  | 29.8494 | 29.9004 |
|              | Q9HVK8     | PA4576 | 22   | 36.4   | 90.222 | 195.48   | 3.02E+09 | 104      | 817     | 25.4043 | 25.6508 | 25.3107 | 25.4523 | 25.6354 | 25.5283 | 25.6838 | 26.0378 |
|              | Q9HVL2     | fkfB   | 7    | 36.6   | 21.795 | 163.93   | 1.58E+10 | 71       | 205     | 30.0563 | 29.4382 | 28.5499 | 30.0321 | 29.1574 | 29.8458 | 29.1827 | 29.8565 |
| isomal pro   | Q9HVL5     | ispB   | 14   | 62.7   | 34.851 | 143.28   | 3.57E+09 | 86       | 322     | 26.8352 | 26.7953 | 26.9114 | 26.461  | 26.7883 | 26.9659 | 26.9711 | 27.2526 |
|              | Q9HVL6     | rplU   | 14   | 77.7   | 11.653 | 96.902   | 9.22E+10 | 189      | 103     | 30.9321 | 31.2967 | 31.1509 | 30.9802 | 31.2029 | 31.0961 | 31.1338 | 31.0714 |
|              | Q9HVL7     | rpmA   | 5    | 51.8   | 8.9903 | 10.174   | 2.46E+09 | 19       | 85      | 27.0534 | 27.6252 | 23.6087 | 27.1681 | 27.6911 | 27.346  | 27.8418 | 27.6363 |
|              | Q9HVL8     | otg    | 20   | 64     | 44.338 | 217.66   | 1.26E+10 | 127      | 406     | 28.1216 | 28.2414 | 28.405  | 27.9874 | 27.9874 | 28.044  | 28.1098 | 27.9539 |
| amate 5-ki   | Q9HVL9     | proB   | 8    | 33.9   | 39.845 | 91.226   | 1.36E+09 | 60       | 372     | 25.4182 | 25.3272 | 25.6866 | 25.4934 | 25.4664 | 25.8013 | 25.6684 | 25.9397 |
|              | Q9HVM0     | PA4564 | 7    | 55.2   | 16.724 | 48.998   | 1.63E+09 | 39       | 154     | 26.4176 | 26.4461 | 26.459  | 25.879  | 26.0003 | 26.2084 | 25.9354 | 25.9403 |
|              | isomal pro | Q9HVM1 | rpsT | 1      | 15.4   | 9.9175   | 9.4061   | 8.54E+09 | 15      | 91      | 29.4262 | 30.2405 | 22.7422 | 30.2771 | 30.6414 | 30.3719 | 30.4749 |
|              | biosynthe  | Q9HVM3 | ribF | 11     | 44.6   | 34.34    | 49.437   | 8.8E+08  | 27      | 312     | 25.8108 | 25.4401 | 25.8629 | 25.9841 | 26.6034 | 25.6132 | 26.2534 |
| lyl cis-tran | Q9HVM6     | PA4558 | 7    | 68.5   | 15.984 | 115.2    | 1.47E+10 | 75       | 146     | 29.3125 | 28.6543 | 27.5819 | 29.3909 | 29.9821 | 29.5365 | 28.8952 | 29.431  |
|              | Q9HVM7     | ispB   | 14   | 51     | 34.762 | 99.852   | 4.27E+09 | 86       | 314     | 24.9274 | 26.9875 | 26.5187 | 27.0686 | 27.1724 | 27.1468 | 27.1367 | 26.9397 |
|              | Q9HVN5     | clpB   | 66   | 74.4   | 95.004 | 323.31   | 6.37E+10 | 550      | 854     | 29.2904 | 29.2782 | 29.497  | 29.0888 | 28.7367 | 28.9675 | 28.9697 | 28.8575 |
|              | Q9HVP4     | PA4533 | 5    | 32.1   | 17.645 | 14.498   | 9.52E+08 | 27       | 156     | 26.2337 | 26.3825 | 26.6539 | 26.3933 | 26.2148 | 26.3564 | 26.4373 | 26.4375 |
| ispho-CoA    | Q9HVP8     | coaE   | 8    | 66     | 22.843 | 77.075   | 2.33E+09 | 46       | 203     | 26.3041 | 26.3103 | 25.7418 | 26.5458 | 26.2559 | 26.3599 | 26.1215 | 26.2028 |
|              | Q9HVL3     | speC   | 19   | 66.7   | 43.559 | 216.69   | 7.76E+09 | 142      | 387     | 26.895  | 26.8418 | 27.0985 | 26.824  | 27.0995 | 27.0432 | 27.28   | 27.0049 |
|              | Q9HVR5     | PA4506 | 6    | 28.5   | 36.339 | 31.284   | 4.06E+08 | 23       | 323     | 24.4728 | 24.6792 | 25.1755 | 24.0435 | 24.5082 | 22.6432 | 23.9714 | 23.105  |
|              | Q9HVR6     | PA4505 | 7    | 38     | 35.429 | 30.371   | 3.55E+08 | 23       | 324     | 25.0152 | 24.6097 | 25.4346 | 24.2005 | 24.2266 | 24.32   | 24.2414 | 23.699  |
| Q9HVS2       | PA4499     | 4      | 41.7 | 20.435 | 9.111  | 2.5E+08  | 14       | 187      | 24.6734 | 24.6574 | 22.8141 | 23.4409 | 24.5146 | 24.8157 | 23.0691 | 24.8941 |         |
|              | Q9HVS3     | PA4498 | 10   | 40     | 44.126 | 74.519   | 4.5E+08  | 34       | 405     | 24.674  | 24.6845 | 24.5242 | 24.744  | 24.3947 | 23.9142 | 23.8245 | 24.3909 |
|              | Q9HVS6     | PA4495 | 11   | 54.7   | 24.879 | 191.25   | 2.34E+10 | 113      | 236     | 29.2942 | 29.4281 | 28.9605 | 29.4447 | 29.3474 | 29.1631 | 29.888  | 29.0055 |
|              | Q9HVS8     | roxR   | 8    | 71     | 20.616 | 93.854   | 1.58E+10 | 71       | 186     | 29.0087 | 29.0918 | 29.3541 | 28.9759 | 28.7415 | 28.8527 | 28.9134 | 28.8672 |
| Q9HVT4       | PA4487     | 5      | 42.2 | 28.145 | 48.71  | 5.46E+08 | 13       | 263      | 23.7879 | 25.9502 | 23.2361 | 23.4937 | 22.3225 | 25.3943 | 25.7635 | 25.5523 |         |
|              | Q9HVT5     | PA4486 | 7    | 76.6   | 13.947 | 21.311   | 1.04E+09 | 17       | 128     | 26.3173 | 22.693  | 23.7782 | 26.3439 | 25.3157 | 26.0595 | 25.7606 | 25.9685 |
|              | Q9HVT7     | gatB   | 26   | 60.5   | 53.081 | 260.59   | 1.67E+10 | 228      | 481     | 28.062  | 28.1006 | 28.0321 | 28.0145 | 28.0002 | 28.2179 | 28.1604 | 28.2611 |
|              | Q9HVT8     | gatA   | 24   | 71.7   | 51.862 | 256.58   | 2E+10    | 180      | 484     | 28.5553 | 28.4613 | 28.6736 | 28.2335 | 28.4336 | 28.8051 | 28.7354 | 28.9561 |
| Q9HVT9       | gatC       | 4      | 79.2 | 10.53  | 41.041 | 2.51E+09 | 42       | 96       | 27.4793 | 24.18   | 24.3083 | 27.0728 | 24.0416 | 27.4564 | 24.5642 | 25.8477 |         |
|              | Q9HVU0     | mreB   | 21   | 57.4   | 36.976 | 312.1    | 2.73E+10 | 184      | 345     | 28.5402 | 28.7226 | 28.7318 | 28.292  | 28.5942 | 28.8017 | 28.8873 | 28.9946 |
|              | Q9HVU4     | caF    | 7    | 20.6   | 54.665 | 42.097   | 3.69E+08 | 27       | 485     | 23.5908 | 24.0841 | 23.8222 | 24.0939 | 24.1844 | 24.245  | 24.1782 | 23.7241 |
|              | Q9HVU6     | PA4475 | 7    | 34     | 30.724 | 17.197   | 3.41E+08 | 16       | 282     | 24.3692 | 24.0723 | 24.6094 | 23.7928 | 23.902  | 23.0227 | 24.3909 | 23.7713 |
| Q9HVU7       | PA4474     | 16     | 51.2 | 50.266 | 226.16 | 9.34E+09 | 123      | 480      | 27.4075 | 27.5413 | 27.664  | 27.4032 | 27.5647 | 27.3796 | 27.6    | 27.2288 |         |
|              | Q9HVU8     | pmbA   | 7    | 52.3   | 20.21  | 42.234   | 2.12E+09 | 31       | 174     | 26.9166 | 27.0879 | 27.0925 | 26.7782 | 26.732  | 26.6339 | 26.8054 | 26.7247 |
|              | Q9HVU9     | PA4473 | 30   | 82     | 47.908 | 323.31   | 1.99E+10 | 218      | 449     | 29.0344 | 29.0575 | 29.3775 | 29.1381 | 29.1756 | 29.0164 | 29.1496 | 28.6863 |
|              | Q9HVU2     | ptsH   | 4    | 60     | 9.7021 | 64.744   | 1.8E+09  | 29       | 90      | 26.9291 | 26.7738 | 26.4915 | 27.0784 | 26.5567 | 26.5835 | 26.6324 | 26.5091 |
| inding pro   | Q9HVU3     | PA4465 | 8    | 45.1   | 32.218 | 88.438   | 2.45E+09 | 53       | 286     | 26.4677 | 26.2906 | 26.7917 | 26.3083 | 26.155  | 26.1994 | 26.6224 | 26.3521 |
|              | Q9HVU4     | ptsN   | 6    | 48.1   | 16.73  | 69.981   | 2.38E+09 | 41       | 154     | 27.0001 | 26.0958 | 25.46   | 27.1726 | 26.1544 | 27.0149 | 25.716  | 26.7762 |
|              | Q9HVU6     | PA4461 | 12   | 56.8   | 26.45  | 106.01   | 1.04E+10 | 116      | 241     | 27.5888 | 27.7521 | 28.0553 | 27.5053 | 27.6386 | 27.8574 | 27.6992 | 27.634  |
|              | Q9HVU7     | lptA   | 8    | 56     | 19.126 | 128.37   | 1.3E+10  | 79       | 175     | 29.3588 | 29.3086 | 29.0213 | 29.1867 | 29.5444 | 29.3724 | 24.9493 | 29.1207 |
| e export sy  | Q9HVU8     | lptC   | 4    | 28.9   | 21.353 | 11.622   | 2.29E+08 | 15       | 190     | 24.1515 | 24.1349 | 24.2087 | 23.5276 | 24.5911 | 24.2881 | 24.2064 | 24.7101 |
|              | Q9HVU9     | PA4458 | 8    | 44.7   | 19.334 | 59.748   | 4.04E+09 | 66       | 179     | 27.1142 | 26.8259 | 26.947  | 27.0149 | 27.244  | 27.4279 | 27.0132 | 27.2592 |
|              | Q9HVU0     | kdsD   | 16   | 63.8   | 34.197 | 165.18   | 1.24E+10 | 136      | 326     | 28.058  | 28.2143 | 28.2364 | 28.0368 | 28.0227 | 28.0448 | 28.2525 | 28.1657 |
|              | Q9HVW1     | PA4456 | 13   | 48.3   | 29.621 | 88.198   | 4.2E+09  | 77       | 269     | 26.1941 | 26.3828 | 26.4468 | 26.0448 | 26.3471 | 26.6387 | 26.5789 | 26.6033 |
| Q9HVW3       | PA4454     | 5      | 47.8 | 16.557 | 29.798 | 8.45E+08 | 28       | 157      | 25.7871 | 22.7857 | 24.4047 | 25.5488 |         |         |         |         |         |



|             |        |        |    |      |        |        |          |     |     |         |         |         |         |         |         |         |         |
|-------------|--------|--------|----|------|--------|--------|----------|-----|-----|---------|---------|---------|---------|---------|---------|---------|---------|
| isomal pro  | Q9HWE2 | rpIP   | 6  | 41.6 | 15.401 | 35.096 | 3.49E+10 | 87  | 137 | 29.6306 | 30.2621 | 29.2805 | 30.2661 | 30.2178 | 30.1016 | 29.8279 | 30.2909 |
| isomal pro  | Q9HWE3 | rpmC   | 5  | 60.3 | 7.2013 | 191.72 | 1.17E+11 | 85  | 63  | 32.4    | 32.0597 | 31.7511 | 32.7082 | 32.4799 | 32.7833 | 32.0875 | 32.5481 |
| isomal pro  | Q9HWE4 | rsPQ   | 6  | 43.2 | 10.086 | 23.4   | 6.99E+10 | 75  | 88  | 31.5964 | 31.9711 | 31.9617 | 31.8891 | 31.8569 | 31.9343 | 32.0672 | 31.6616 |
| isomal pro  | Q9HWE5 | rpIN   | 11 | 61.5 | 13.412 | 177.65 | 3.56E+10 | 149 | 122 | 30.0158 | 30.4626 | 30.1252 | 30.2732 | 30.4324 | 30.1988 | 30.2321 | 30.1781 |
| isomal pro  | Q9HWE6 | rpIX   | 15 | 67.3 | 11.47  | 323.31 | 2.16E+11 | 270 | 104 | 32.2615 | 32.6388 | 32.3941 | 32.5467 | 32.9098 | 32.5163 | 32.8097 | 32.4663 |
| osomal prc  | Q9HWE7 | rpIE   | 17 | 61.7 | 20.392 | 127.38 | 1.56E+11 | 263 | 179 | 31.8288 | 32.1013 | 32.3037 | 32.273  | 32.0391 | 31.8204 | 31.7659 | 31.7556 |
| isomal pro  | Q9HWE8 | rpsN   | 3  | 31.7 | 11.565 | 7.9815 | 9.77E+09 | 22  | 101 | 29.0046 | 29.7872 | 28.7391 | 29.343  | 30.2199 | 29.8308 | 29.6406 | 29.5402 |
| osomal prc  | Q9HWE9 | rpsH   | 9  | 65.4 | 14.17  | 77.788 | 2E+11    | 382 | 130 | 32.7832 | 32.8557 | 32.6416 | 32.9271 | 32.7888 | 32.7598 | 32.7948 | 32.5462 |
| osomal prc  | Q9HWF0 | rpIF   | 15 | 73.4 | 19.099 | 117.37 | 2.36E+11 | 247 | 177 | 32.4366 | 32.6614 | 32.8596 | 32.5945 | 32.7246 | 32.6282 | 32.6161 | 32.4161 |
| isomal pro  | Q9HWF1 | rpIR   | 4  | 36.2 | 12.661 | 43.512 | 5.26E+10 | 44  | 116 | 30.5625 | 31.1121 | 30.4883 | 30.9727 | 31.3403 | 31.2408 | 31.0237 | 31.0952 |
| osomal prc  | Q9HWF2 | rpsE   | 10 | 65.7 | 17.625 | 182.69 | 1.39E+11 | 369 | 166 | 32.3205 | 32.625  | 32.7011 | 32.5518 | 32.5927 | 32.4906 | 32.6118 | 32.4038 |
| isomal pro  | Q9HWF3 | rpmD   | 2  | 25.9 | 6.4775 | 162.67 | 5.38E+10 | 36  | 58  | 31.6809 | 31.7832 | 31.925  | 31.7079 | 31.6493 | 31.8042 | 31.5882 | 31.5357 |
| isomal pro  | Q9HWF4 | rpIO   | 10 | 54.9 | 15.174 | 107.35 | 6.13E+10 | 89  | 144 | 30.65   | 31.1223 | 30.7171 | 31.0894 | 31.4224 | 31.2433 | 31.2417 | 31.1056 |
| isomal pro  | Q9HWF7 | rpsM   | 13 | 65.3 | 13.265 | 184.92 | 3.54E+10 | 139 | 118 | 29.7182 | 30.4181 | 29.4601 | 30.2541 | 30.6584 | 30.4157 | 30.3445 | 30.6057 |
| isomal pro  | Q9HWF8 | rpsK   | 6  | 49.6 | 13.629 | 67.244 | 7.64E+10 | 76  | 129 | 32.4851 | 32.9703 | 31.8785 | 33.2046 | 33.1189 | 33.1221 | 32.809  | 33.1019 |
| cterioferri | Q9HWF9 | bfr    | 9  | 78.6 | 17.94  | 93.695 | 3.07E+09 | 47  | 154 | 27.5972 | 27.2398 | 26.4027 | 27.9066 | 25.9965 | 27.2318 | 26.2538 | 26.9096 |
| :system pr  | Q9HWF0 | uvrA   | 26 | 48.9 | 104.49 | 118.08 | 2.41E+09 | 106 | 945 | 25.8687 | 26.0141 | 23.7296 | 26.4076 | 26.4786 | 26.2844 | 26.3357 | 26.6753 |
|             | Q9HWR2 | aph    | 18 | 64.9 | 29.812 | 323.31 | 2.15E+10 | 181 | 268 | 28.7813 | 28.7935 | 28.4319 | 28.6401 | 28.7092 | 28.8429 | 29.0024 | 28.8729 |
|             | Q9HWR9 | PA4069 | 6  | 30.3 | 32.939 | 27.225 | 4.3E+08  | 19  | 294 | 25.1682 | 23.4793 | 24.8526 | 23.168  | 25.2279 | 25.1931 | 25.0206 | 24.9024 |
|             | Q9HWR0 | PA4068 | 11 | 57.8 | 33.31  | 98.535 | 3.66E+09 | 72  | 309 | 27.0628 | 26.9929 | 27.1224 | 26.9687 | 27.1671 | 27.2828 | 27.3673 | 27.2488 |
|             | Q9HWW1 | optA   | 4  | 22.8 | 25.193 | 34.431 | 5.54E+08 | 12  | 232 | 26.5688 | 26.5161 | 22.8711 | 25.6594 | 25.6117 | 23.7583 | 25.6555 | 25.6555 |
|             | Q9HWW5 | PA4063 | 7  | 46.4 | 21.235 | 22.025 | 9.82E+08 | 31  | 196 | 26.5849 | 25.5159 | 23.0757 | 26.7389 | 25.3582 | 26.3511 | 25.3132 | 25.7308 |
|             | Q9HWW7 | PA4061 | 13 | 47.4 | 31.878 | 210.74 | 1.27E+10 | 110 | 289 | 28.4551 | 28.0203 | 27.1324 | 28.5704 | 28.1473 | 28.3786 | 27.8344 | 28.2825 |
| ional repre | Q9HWX1 | nrdR   | 7  | 45.5 | 17.925 | 48.953 | 2.03E+09 | 50  | 154 | 26.2886 | 26.6176 | 26.3064 | 26.3655 | 26.3926 | 26.4048 | 26.5107 | 26.115  |
| ynthesis    | Q9HWX2 | ribD   | 16 | 60.9 | 39.764 | 148.57 | 2.49E+09 | 89  | 373 | 26.4673 | 26.629  | 26.8699 | 26.3665 | 26.4023 | 26.3852 | 26.4321 | 26.432  |
| tanone 4-g  | Q9HWX4 | ribB   | 16 | 66   | 39.438 | 222.66 | 2.35E+10 | 151 | 365 | 29.2569 | 29.4307 | 29.5352 | 29.1817 | 28.7144 | 28.9544 | 29.0661 | 28.9876 |
| istance prc | Q9HWX6 | nusB   | 7  | 55.3 | 17.707 | 42.348 | 6.25E+09 | 51  | 159 | 28.385  | 28.6194 | 28.6618 | 28.6412 | 28.3991 | 28.2209 | 28.4007 | 28.2742 |
| yclohydrol  | Q9HWY1 | ribA   | 9  | 68.3 | 22.099 | 83.308 | 4.09E+09 | 67  | 205 | 26.9538 | 27.3252 | 26.9572 | 27.0206 | 27.0519 | 27.0907 | 27.0397 | 27.0924 |
|             | Q9HWY4 | ispA   | 13 | 59   | 31.464 | 101.75 | 2.89E+09 | 90  | 295 | 26.2728 | 26.3266 | 25.7892 | 26.2559 | 26.2698 | 26.399  | 26.5265 | 26.3944 |
| nuclease 7  | Q9HWY5 | xseB   | 4  | 75   | 8.9728 | 118.1  | 2.69E+09 | 48  | 80  | 26.8191 | 26.1663 | 25.7431 | 27.0082 | 26.8591 | 26.9345 | 26.6847 | 26.8406 |
|             | Q9HWZ2 | PA4035 | 11 | 46.8 | 35.895 | 80.897 | 1.47E+09 | 51  | 333 | 26.2572 | 26.2331 | 26.0776 | 26.3322 | 25.8502 | 25.8019 | 25.7453 | 25.9321 |
|             | Q9HWZ5 | PA4032 | 2  | 25.6 | 27.422 | 23.714 | 5.9E+08  | 15  | 238 | 25.5183 | 23.7051 | 23.1445 | 25.3182 | 25.2833 | 25.4906 | 25.9807 | 26.04   |
| c pyrophos  | Q9HWZ6 | ppa    | 13 | 60   | 19.396 | 151.9  | 7.14E+10 | 194 | 175 | 31.4744 | 30.5477 | 29.8871 | 31.3076 | 30.8416 | 31.3232 | 30.3966 | 31.2517 |
|             | Q9HX07 | mpl    | 10 | 36.8 | 48.469 | 123.03 | 5.72E+09 | 87  | 451 | 27.4448 | 27.4059 | 27.3544 | 27.436  | 27.8265 | 27.689  | 28.108  | 27.7226 |
|             | Q9HX10 | PA4017 | 11 | 52.1 | 23.164 | 51.858 | 2.98E+09 | 77  | 213 | 26.7316 | 26.8539 | 26.5401 | 26.717  | 26.5772 | 26.466  | 26.6559 | 26.4129 |
| myl phosph  | Q9HX20 | proA   | 23 | 74.1 | 45.044 | 323.31 | 2.18E+10 | 181 | 421 | 28.2735 | 28.2515 | 28.4482 | 28.2237 | 28.2776 | 28.4576 | 28.6255 | 28.4668 |
| nucleotide  | Q9HX21 | nadD   | 6  | 44.4 | 23.801 | 67.995 | 1.12E+09 | 30  | 214 | 25.4142 | 25.8763 | 25.8291 | 25.7769 | 25.7576 | 26.1076 | 26.2425 | 25.7018 |
| silencing f | Q9HX22 | rsfS   | 7  | 83.9 | 13.054 | 81.313 | 6.09E+09 | 63  | 118 | 28.2283 | 27.8407 | 27.7203 | 28.3748 | 27.3995 | 28.2026 | 27.9819 | 28.1818 |
| e subunit r | Q9HX23 | rlmH   | 6  | 50.3 | 17.79  | 39.477 | 7.37E+08 | 24  | 155 | 25.1267 | 25.0753 | 25.4298 | 25.1807 | 25.4507 | 25.4122 | 25.5323 | 25.2367 |
|             | Q9HX24 | sltB1  | 16 | 65   | 37.867 | 134.22 | 3.44E+09 | 84  | 340 | 26.4907 | 26.5388 | 26.8964 | 26.7106 | 26.9912 | 26.788  | 26.8153 | 26.3701 |
| oyl syntha  | Q9HX25 | lipA   | 19 | 63.3 | 37.763 | 187.19 | 1.13E+10 | 158 | 327 | 27.9282 | 27.916  | 28.0266 | 27.8598 | 28.0079 | 28.0618 | 28.2336 | 28.0653 |
|             | Q9HX28 | PA3992 | 13 | 47.8 | 47.73  | 85.448 | 1.06E+09 | 46  | 448 | 24.892  | 24.9736 | 25.1394 | 24.8167 | 24.8492 | 24.7959 | 24.834  | 24.8256 |
|             | Q9HX31 | holA   | 8  | 43.2 | 37.378 | 47.155 | 9.72E+08 | 50  | 345 | 24.5869 | 24.4209 | 24.3685 | 24.7239 | 24.8311 | 24.8293 | 24.9478 | 24.9525 |
| ne--tRNA I  | Q9HX33 | leuS   | 42 | 59.7 | 97.647 | 323.31 | 2.42E+10 | 330 | 873 | 27.6941 | 27.7628 | 27.2875 | 28.0009 | 28.4847 | 28.4122 | 28.134  | 28.0121 |
|             | Q9HX36 | PA3983 | 12 | 47.3 | 31.548 | 74.32  | 3.49E+09 | 90  | 279 | 26.3786 | 26.4862 | 26.77   | 26.2303 | 26.6798 | 26.6688 | 26.292  | 26.2681 |
| bonuclease  | Q9HX37 | ybeY   | 6  | 49.4 | 17.981 | 50.99  | 7.75E+08 | 21  | 160 | 25.9972 | 25.1673 | 22.6203 | 24.9842 | 25.398  | 25.3324 | 25.3741 | 25.3741 |
|             | Q9HX38 | PA3981 | 11 | 50.6 | 38.424 | 62.953 | 1.95E+09 | 47  | 340 | 26.068  | 26.4617 | 26.6345 | 25.9547 | 26.0807 | 26.1398 | 26.3928 | 26.8522 |
|             | Q9HX39 | PA3979 | 4  | 46.4 | 12.624 | 26.519 | 1.35E+09 | 26  | 110 | 26.1081 | 25.9665 | 25.6172 | 26.0211 | 26.2543 | 26.4801 | 25.896  | 26.2328 |
| phosphate   | Q9HX40 | thiE   | 8  | 64.6 | 22.146 | 135.55 | 1.68E+09 | 37  | 209 | 26.6701 | 26.3118 | 27.0948 | 26.9459 | 26.6929 | 26.7974 | 26.9067 | 26.6818 |
|             | Q9HX41 | thiD   | 9  | 56.6 | 27.979 | 127.73 | 3.7E+09  | 76  | 265 | 27.1305 | 26.8827 | 26.6992 | 26.975  | 26.8147 | 27.0802 | 26.8397 | 27.0666 |
|             | Q9HX44 | PA3972 | 18 | 55.9 | 60.338 | 127.58 | 1.92E+09 | 76  | 549 | 25.7743 | 26.1357 | 25.8017 | 26.0046 | 25.4601 | 25.4336 | 25.3743 | 25.4573 |
| P nucleosic | Q9HX46 | amn    | 9  | 29.7 | 56.225 | 50.431 | 5.94E+08 | 32  | 499 | 24.0858 | 24.8733 | 24.3578 | 24.448  | 24.368  | 24.228  | 24.3506 | 24.5873 |
|             | Q9HX49 | PA3967 | 4  | 51.5 | 14.705 | 31.339 | 1.99E+09 | 22  | 130 | 27.4261 | 27.3252 | 27.3583 | 27.5926 | 27.5311 | 27.2527 | 27.3931 | 27.1539 |
|             | Q9HX51 | PA3965 | 8  | 48.5 | 19.289 | 23.345 | 1.43E+09 | 29  | 169 | 27.1349 | 27.3533 | 27.6802 | 26.9363 | 26.8053 | 27.1354 | 26.7473 | 26.5099 |
|             | Q9HX64 | PA3952 | 4  | 42.9 | 19.793 | 102.88 | 2.53E+09 | 44  | 191 | 26.6822 | 25.8747 | 24.2875 | 26.4039 | 26.8212 | 27.5078 | 26.7439 | 27.3427 |
|             | Q9HX66 | PA3950 | 5  | 15.4 | 48.6   | 16.871 | 1.51E+08 | 16  | 449 | 23.5343 | 23.906  | 22.1072 | 23.7021 | 23.939  | 23.8188 | 23.3261 | 23.7622 |
|             | Q9HX68 | rocA1  | 6  | 34.9 | 22.995 | 24.912 | 8.59E+08 | 25  | 209 | 25.7395 | 25.71   | 26.1043 | 25.7115 | 25.7487 | 25.6061 | 25.6917 | 25.4196 |
|             | Q9HX71 | PA3945 | 3  | 21.9 | 22.403 | 10.961 | 3.18E+08 | 21  | 196 | 24.6232 | 24.6404 | 24.6491 | 24.5732 | 24.5259 | 24.5639 | 25.2736 | 24.15   |
|             | Q9HX72 | PA3944 | 4  | 28.6 | 21.857 | 27.772 | 6.54E+08 | 24  | 192 | 25.0842 | 24.9306 | 24.9191 | 25.0258 | 25.1035 | 25.0812 | 25.1701 | 25.0923 |
|             | Q9HX74 | tesB   | 7  | 40.1 | 32.934 | 56.143 | 1.76E+09 | 58  | 289 | 26.4714 | 26.5126 | 26.3437 | 26.4352 | 26.718  | 26.2827 | 26.1694 | 26.1679 |
|             | Q9HX85 | PA3931 | 15 | 54.4 | 28.101 | 103.19 | 1.16E+10 | 109 | 259 | 28.2736 | 28.7439 | 27.4263 | 28.5195 | 28.6175 | 28.2969 | 28.1365 | 28.5416 |
| hosphate :  | Q9HX95 | moaC   | 6  | 41.2 | 17.338 | 32.286 | 4.46E+09 | 51  | 160 | 27.3395 | 27.3388 | 26.7953 | 27.5252 | 26.9281 | 27.0028 | 26.8993 | 26.9838 |
| ynthase sul | Q9HX96 | moaD   | 3  | 43.4 | 9.2153 | 34.751 | 1.61E+09 | 32  | 83  | 27.3493 | 26.7591 | 26.6842 | 27.7043 | 26.58   | 27.4082 | 26.9099 | 26.6494 |
|             | Q9HX97 | moaE   | 5  | 58   | 16.886 | 26.829 | 6.55E+08 | 28  | 150 | 26.3439 | 25.6604 | 25.4952 | 26.2006 | 25.4669 | 24.9007 | 25.2842 | 25.634  |
| actor bios  | Q9HX98 | moaB1  | 11 | 88.6 | 19.669 | 98.495 | 2.11E+09 | 63  | 185 | 26.8987 | 26.7195 | 27.0412 | 26.8219 | 26.6444 | 26.9131 | 26.5292 | 26.7433 |
| hain rleas  | Q9HX80 | rpfC   |    |      |        |        |          |     |     |         |         |         |         |         |         |         |         |

|               |              |        |        |        |        |          |          |          |         |         |         |         |         |         |         |         |         |
|---------------|--------------|--------|--------|--------|--------|----------|----------|----------|---------|---------|---------|---------|---------|---------|---------|---------|---------|
| mylate kin    | Q9HXV4       | adk    | 12     | 65.1   | 23.107 | 238.3    | 5.75E+10 | 219      | 215     | 30.6777 | 30.5848 | 29.6854 | 30.979  | 30.6473 | 30.7243 | 30.3047 | 30.4881 |
|               | Q9HXV5       | PA3685 | 5      | 38.5   | 24.18  | 61.636   | 1E+09    | 35       | 226     | 25.8892 | 25.6339 | 25.9545 | 26.1415 | 25.5274 | 25.8761 | 26.0338 | 25.8946 |
| ill subunit i | Q9HXW0       | rsmj   | 6      | 34.5   | 27.904 | 27.186   | 4.18E+08 | 13       | 261     | 25.117  | 24.6756 | 24.0591 | 25.3128 | 25.0197 | 25.0394 | 24.8346 | 25.3199 |
|               | Q9HXW2       | PA3678 | 7      | 52.8   | 23.15  | 30.699   | 5.04E+08 | 28       | 212     | 24.5094 | 23.9977 | 23.3718 | 24.6188 | 24.6044 | 24.6549 | 24.6396 | 24.3133 |
|               | Q9HXW6       | PA3674 | 4      | 47     | 14.393 | 30.204   | 9.18E+08 | 14       | 132     | 23.5942 | 22.9637 | 23.1853 | 25.3798 | 23.1023 | 26.8055 | 27.2072 | 26.8777 |
|               | Q9HXK2       | PA3668 | 6      | 62.1   | 15.927 | 57.786   | 6.63E+08 | 36       | 140     | 25.0465 | 24.9157 | 24.6091 | 25.1283 | 24.9855 | 24.8491 | 24.8385 | 24.6759 |
| cysteine de   | Q9HXK3       | csd    | 10     | 37.9   | 43.274 | 74.441   | 1.34E+09 | 56       | 401     | 25.107  | 25.3023 | 25.5021 | 25.1943 | 25.4073 | 25.4663 | 25.4368 | 25.2106 |
|               | Q9HXK5       | PA3664 | 9      | 77.4   | 13.111 | 52.324   | 4.85E+09 | 58       | 115     | 27.7784 | 27.4028 | 27.0728 | 27.895  | 27.4826 | 27.6259 | 27.3375 | 27.6016 |
| ine aminop    | Q9HXY1       | map    | 15     | 75.1   | 29.086 | 154.82   | 2.74E+10 | 139      | 261     | 29.4073 | 29.3934 | 29.374  | 29.3121 | 29.1173 | 29.3451 | 29.3623 | 29.2788 |
| te synthasi   | Q9HXY2       | upp5   | 4      | 22.7   | 28.04  | 104.48   | 1.67E+09 | 24       | 251     | 26.4618 | 27.2405 | 27.4249 | 26.9554 | 26.9977 | 27.2964 | 27.7496 | 27.2733 |
| p-like prot   | Q9HXY5       | PA3647 | 7      | 38.7   | 19.09  | 46.408   | 4.7E+10  | 87       | 168     | 30.4054 | 30.6863 | 30.3372 | 30.5898 | 30.9268 | 30.8585 | 30.9813 | 30.8318 |
| cosamine f    | Q9HYX6       | lpxD   | 7      | 31.7   | 36.191 | 40.024   | 1.84E+09 | 31       | 353     | 26.0875 | 26.136  | 26.15   | 26.0611 | 26.093  | 26.3131 | 26.002  | 26.186  |
| saccharide    | Q9HYX8       | lpxB   | 8      | 32     | 41.294 | 30.549   | 2.8E+08  | 24       | 378     | 24.0408 | 23.5937 | 23.1583 | 24.1998 | 23.4422 | 23.9927 | 23.6806 | 24.3556 |
| onuclease     | Q9HYX9       | rnhB   | 9      | 49.3   | 21.771 | 28.041   | 8.36E+08 | 26       | 201     | 25.9436 | 22.9005 | 23.3581 | 25.4773 | 24.3265 | 25.5367 | 25.2662 | 25.9707 |
| erage III su  | Q9HXZ1       | dnaE   | 16     | 21.7   | 130.9  | 47.363   | 3.26E+08 | 36       | 1173    | 23.5179 | 23.2202 | 23.2697 | 23.3847 | 24.4264 | 23.3062 | 23.5092 | 24.4633 |
| ase carbox    | Q9HXZ2       | accA   | 21     | 66.8   | 34.947 | 323.31   | 4.21E+10 | 231      | 316     | 29.4423 | 29.5416 | 29.4317 | 29.3693 | 29.1913 | 29.3788 | 29.4393 | 29.4718 |
| TP synthas    | Q9HXZ4       | pyrG   | 32     | 75.3   | 59.617 | 323.31   | 2.04E+10 | 252      | 542     | 27.7137 | 28.0049 | 27.7055 | 27.7294 | 28.1425 | 28.2833 | 28.179  | 28.561  |
| Enolase       | Q9HXZ5       | eno    | 22     | 63.4   | 45.195 | 323.31   | 1.59E+11 | 356      | 429     | 30.9481 | 30.9338 | 31.0093 | 31.0262 | 31.1725 | 31.2794 | 31.3605 | 31.137  |
|               | Q9HXZ8       | PA3632 | 5      | 79.3   | 9.1152 | 30.86    | 1.54E+09 | 25       | 82      | 27.1709 | 25.6926 | 24.7867 | 27.1374 | 25.1411 | 26.7953 | 25.0888 | 26.2982 |
| [glutathion   | Q9HY01       | adhC   | 12     | 46.5   | 39.208 | 123.22   | 2.08E+10 | 127      | 370     | 29.2038 | 29.1518 | 29.4209 | 28.973  | 29.377  | 29.5182 | 29.4924 | 29.5118 |
|               | Q9HY02       | PA3628 | 11     | 60.4   | 31.275 | 133.6    | 6.87E+09 | 100      | 283     | 27.5861 | 27.4723 | 27.6101 | 27.7596 | 28.2714 | 27.9687 | 27.9524 | 27.6366 |
|               | Q9HY05       | surF   | 6      | 37.8   | 26.368 | 70.64    | 3.2E+09  | 56       | 249     | 26.7647 | 26.7265 | 26.4861 | 26.768  | 26.8322 | 26.7783 | 26.7008 | 26.747  |
| iclotidase    | Q9HY07       | fdxA   | 3      | 24.3   | 12.159 | 22.31    | 1.03E+10 | 39       | 107     | 29.2362 | 28.7599 | 26.9895 | 29.4381 | 28.7675 | 29.2052 | 27.7236 | 29.0797 |
| erredoxin     | Q9HY08       | mutS   | 18     | 32.6   | 94.977 | 80.082   | 4.81E+08 | 55       | 855     | 23.2415 | 24.0042 | 23.746  | 24.2214 | 25.118  | 24.2005 | 23.8422 | 24.8299 |
| ch repair p   | Q9HY10       | PA3618 | 6      | 59.5   | 17.715 | 51.348   | 6.28E+08 | 27       | 168     | 25.1055 | 25.6185 | 25.4103 | 25.1021 | 25.8254 | 25.5337 | 25.5381 | 25.3713 |
| Q9HY11        | PA3615       | 7      | 26.1   | 40.465 | 28.288 | 5.05E+08 | 25       | 356      | 25.3581 | 25.4844 | 25.0918 | 25.3474 | 24.9859 | 24.2962 | 24.644  | 24.6292 | 24.6836 |
|               | PA3611       | 3      | 47.5   | 14.986 | 82.416 | 1.45E+10 | 19       | 136      | 30.4683 | 29.9858 | 28.6254 | 30.2675 | 30.0258 | 30.3328 | 29.9942 | 30.3544 | 30.7648 |
|               | import ATP   | potA2  | 8      | 33.8   | 40.044 | 58.643   | 9.64E+08 | 32       | 363     | 26.4848 | 25.8003 | 26.2404 | 26.3382 | 25.7575 | 26.0505 | 25.3836 | 25.3656 |
| Q9HY22        | erfR         | 10     | 69.1   | 23.531 | 98.525 | 6.66E+09 | 91       | 217      | 27.6237 | 27.7335 | 27.3849 | 27.6116 | 27.5466 | 27.4916 | 27.5307 | 27.5446 | 27.5446 |
|               | Q9HY50       | PA3567 | 13     | 64.7   | 36.677 | 157.65   | 8.03E+09 | 77       | 337     | 28.2614 | 28.5552 | 28.7506 | 28.1468 | 28.2681 | 28.2838 | 28.386  | 28.2308 |
|               | Q9HY51       | PA3566 | 4      | 68     | 11.167 | 28.248   | 2.47E+09 | 17       | 97      | 28.4898 | 24.1753 | 26.3927 | 28.0512 | 22.361  | 28.4957 | 27.5699 | 28.6189 |
| Q9HY54        | fruI         | 11     | 39.5   | 36.387 | 76.712 | 6.35E+08 | 51       | 329      | 24.6189 | 24.8823 | 25.0605 | 24.4069 | 24.4425 | 24.4874 | 24.5526 | 24.564  | 24.564  |
|               | Q9HY55       | fruI   | 16     | 32.5   | 101.57 | 107.48   | 1.27E+09 | 71       | 956     | 25.094  | 24.8951 | 24.9683 | 24.9203 | 24.6682 | 25.2857 | 24.9331 | 25.2029 |
|               | Q9HY56       | fruK   | 7      | 33.8   | 33.381 | 40.382   | 1.25E+09 | 42       | 314     | 26.2781 | 26.1863 | 26.8075 | 26.2509 | 25.5422 | 25.9338 | 26.0176 | 25.8335 |
| phofructo     | Q9HY58       | PA3559 | 19     | 50.2   | 51.795 | 169.11   | 6.52E+09 | 139      | 464     | 26.8478 | 26.9076 | 27.2715 | 26.3449 | 26.9537 | 27.3541 | 27.4096 | 27.6398 |
|               | Q9HY64       | arnC   | 9      | 39.8   | 37.296 | 22.454   | 6.07E+08 | 30       | 339     | 23.7872 | 24.4013 | 23.4363 | 24.2319 | 24.6442 | 24.7746 | 24.0616 | 24.9339 |
|               | oxyl-4-form  | Q9HY65 | arnB   | 20     | 60.2   | 41.866   | 248.54   | 4.85E+10 | 205     | 382     | 30.0581 | 30.1026 | 30.189  | 30.1305 | 30.7252 | 30.5273 | 30.5827 |
| binose-ox     | Q9HY72       | PA3539 | 11     | 62.9   | 29.56  | 110.61   | 3.17E+09 | 59       | 259     | 26.8391 | 26.9431 | 27.0908 | 26.3888 | 26.8304 | 27.0151 | 27.2039 | 26.8677 |
| 16 protein i  | Q9HY73       | PA3538 | 9      | 46.7   | 39.189 | 48.229   | 1.15E+09 | 31       | 360     | 25.7553 | 26.2624 | 25.8637 | 25.6024 | 25.9666 | 26.1859 | 26.194  | 26.1312 |
|               | Q9HY77       | PA3533 | 7      | 61.1   | 11.843 | 31.402   | 1.25E+10 | 50       | 108     | 30.7425 | 29.0689 | 28.5093 | 30.3806 | 28.2746 | 30.0469 | 28.1747 | 29.1308 |
|               | Q9HY81       | PA3529 | 14     | 89.5   | 21.822 | 165.43   | 1.29E+11 | 198      | 200     | 31.8066 | 32.1234 | 32.0253 | 31.8769 | 31.8999 | 31.946  | 32.1036 | 31.8926 |
| ilutaredoxi   | Q9HY82       | rnt    | 10     | 62.9   | 24.723 | 148.34   | 6.3E+09  | 74       | 224     | 27.5186 | 27.5253 | 27.417  | 27.4153 | 27.2005 | 27.2426 | 27.306  | 27.1973 |
|               | Q9HY84       | argG   | 30     | 82.7   | 45.297 | 323.31   | 3.11E+10 | 259      | 405     | 29.4262 | 29.6438 | 29.674  | 29.1864 | 29.0504 | 29.3793 | 29.2686 | 29.2836 |
|               | succinate i  | Q9HY83 | PA3496 | 5      | 79.7   | 6.8834   | 22.389   | 1.94E+09 | 27      | 59      | 27.8232 | 27.4476 | 24.6614 | 28.1568 | 27.8993 | 27.5125 | 27.0432 |
| donuclease    | Q9HY84       | nth    | 8      | 42.9   | 23.737 | 40.025   | 9.16E+08 | 34       | 212     | 25.8207 | 26.0677 | 26.0213 | 25.9496 | 26.0882 | 26.089  | 25.8083 | 25.9534 |
| nine--trnU    | Q9HYC7       | metG   | 32     | 65.7   | 74.903 | 323.31   | 1.61E+10 | 219      | 677     | 27.2338 | 27.3767 | 26.9709 | 27.4754 | 27.8919 | 27.7976 | 27.522  | 27.5574 |
|               | Q9HYC8       | PA3481 | 12     | 54.4   | 38.888 | 104.77   | 5.48E+09 | 69       | 364     | 27.697  | 27.7421 | 27.7286 | 27.3678 | 27.5138 | 27.6816 | 27.9229 | 27.9586 |
|               | triphosphi   | Q9HYC9 | dcd    | 6      | 46.3   | 21.154   | 69.637   | 3.76E+09 | 53      | 188     | 27.21   | 27.3432 | 27.5362 | 27.3148 | 27.3281 | 27.3783 | 27.3822 |
| ndent mal     | Q9HYD5       | maeA   | 22     | 64.4   | 62.42  | 323.31   | 1.14E+10 | 142      | 564     | 27.8737 | 27.7087 | 27.7079 | 27.7016 | 28.0107 | 28.3515 | 28.519  | 28.3335 |
|               | Q9HYE0       | PA3466 | 13     | 43.5   | 48.989 | 56.076   | 1.21E+09 | 72       | 446     | 24.761  | 25.0326 | 24.5472 | 25.159  | 24.9764 | 24.8506 | 25.0124 | 25.2991 |
|               | 12 protein i | Q9HYF3 | PA3453 | 8      | 57.5   | 24.16    | 82.422   | 4.15E+09 | 59      | 221     | 26.6572 | 26.8094 | 26.9337 | 26.6039 | 27.1695 | 26.9461 | 27.0572 |
| :quinone c    | Q9HYF4       | mqoI   | 11     | 32.1   | 57.21  | 53.234   | 1.36E+09 | 56       | 523     | 25.0805 | 25.4162 | 25.0513 | 25.5946 | 25.63   | 25.2667 | 25.0705 | 25.5787 |
|               | Q9HYF6       | PA3450 | 13     | 73.1   | 24.164 | 115.29   | 9.74E+09 | 93       | 212     | 28.0901 | 29.0376 | 27.9351 | 28.2022 | 28.2386 | 27.8805 | 28.123  | 28.0756 |
|               | Q9HYG6       | PA3440 | 7      | 63.1   | 11.637 | 104.31   | 8.18E+09 | 60       | 103     | 29.0489 | 27.1092 | 26.4176 | 28.9626 | 27.2109 | 29.0309 | 27.0091 | 28.3543 |
| c/hydrolyz    | Q9HYG8       | foiE1  | 9      | 53.8   | 20.833 | 22.816   | 4.64E+08 | 27       | 186     | 24.2958 | 24.5998 | 24.34.  |         |         |         |         |         |

|              |          |        |    |      |        |        |          |     |      |         |         |         |         |         |         |         |         |
|--------------|----------|--------|----|------|--------|--------|----------|-----|------|---------|---------|---------|---------|---------|---------|---------|---------|
|              | Q9HZG8   | PA3040 | 5  | 39.4 | 11.916 | 49.167 | 9.67E+08 | 35  | 109  | 25.1909 | 25.7694 | 25.6401 | 25.7986 | 25.9317 | 25.5476 | 26.3254 | 25.8337 |
|              | Q9HZH4   | PA3034 | 3  | 20.5 | 20.988 | 7.259  | 1.37E+08 | 13  | 185  | 22.9409 | 23.797  | 23.7966 | 22.986  | 22.0784 | 22.7906 | 23.8848 | 22.4625 |
|              | Q9HZH8   | moeA2  | 7  | 28.6 | 43.39  | 49.966 | 7.98E+08 | 27  | 405  | 24.832  | 25.0487 | 25.1614 | 24.6661 | 24.888  | 25.0233 | 25.1787 | 25.4557 |
|              | Q9HZI4   | PA3022 | 11 | 50.7 | 29.579 | 47.059 | 1.19E+09 | 43  | 268  | 26.0146 | 26.2912 | 26.49   | 26.3842 | 26.0236 | 25.8074 | 25.9745 | 25.4681 |
|              | Q9HZI5   | PA3021 | 9  | 56.2 | 14.206 | 87.737 | 1.61E+09 | 54  | 128  | 26.0806 | 25.5174 | 24.687  | 26.3427 | 25.4952 | 25.7001 | 25.4694 | 25.7683 |
|              | Q9HZI7   | PA3019 | 17 | 37.8 | 71.155 | 91.792 | 1.65E+09 | 107 | 640  | 24.937  | 25.1255 | 24.8912 | 25.0434 | 25.0471 | 24.9994 | 25.143  | 25.4768 |
| sal stress p | Q9HZI9   | PA3017 | 5  | 69   | 15.844 | 72.881 | 1.71E+09 | 39  | 145  | 26.8803 | 26.1102 | 26.2586 | 26.8602 | 25.2642 | 26.0847 | 25.8746 | 25.4688 |
| oyl-CoA is   | Q9HZI2   | fadB   | 30 | 51   | 76.953 | 246.46 | 1.54E+10 | 276 | 715  | 27.413  | 27.506  | 27.4217 | 27.1675 | 27.1176 | 27.3579 | 27.3434 | 27.3093 |
| acyl-CoA t   | Q9HZJ3   | fadA   | 13 | 61.6 | 41.643 | 171.65 | 2.45E+10 | 132 | 391  | 29.9661 | 30.0839 | 30.21   | 29.8637 | 29.717  | 29.6787 | 29.8929 | 29.6597 |
| opoisomeri   | Q9HZJ5   | topA   | 37 | 52.5 | 97.282 | 264.86 | 6.94E+09 | 168 | 868  | 26.0926 | 26.4775 | 25.9282 | 26.434  | 26.5613 | 26.676  | 26.4402 | 26.7204 |
|              | Q9HZJ6   | PA3010 | 5  | 44.8 | 19.071 | 22.912 | 6.99E+08 | 30  | 172  | 25.0304 | 24.0951 | 25.3373 | 25.1319 | 24.9629 | 25.0636 | 25.1106 | 24.9564 |
|              | Q9HZJ9   | psrA   | 12 | 70.8 | 25.784 | 80.299 | 3.87E+09 | 70  | 233  | 27.5507 | 27.3762 | 27.4312 | 27.3716 | 27.3571 | 27.2281 | 27.4233 | 27.0736 |
| hexosamin    | Q9HZK0   | nagZ   | 13 | 50.9 | 36.101 | 98.981 | 6.58E+09 | 107 | 332  | 27.6612 | 27.7327 | 27.6435 | 27.5871 | 27.7799 | 27.6286 | 27.7776 | 27.6441 |
|              | Q9HZK2   | PA3003 | 9  | 72.2 | 22.474 | 63.103 | 8.09E+09 | 91  | 209  | 28.9062 | 28.7137 | 27.7991 | 28.8678 | 28.8847 | 28.9386 | 28.678  | 28.8287 |
| lDH-quinor   | Q9HZK6   | nqrA   | 18 | 58   | 48.081 | 205.76 | 6.22E+09 | 115 | 445  | 27.2029 | 27.3561 | 27.2257 | 27.1544 | 27.3984 | 27.4937 | 27.3183 | 27.446  |
| lDH-quinor   | Q9HZK8   | nqrC   | 6  | 37.2 | 27.779 | 18.73  | 5.8E+08  | 22  | 261  | 23.7995 | 24.9441 | 23.1289 | 24.9583 | 24.8611 | 25.1505 | 24.7696 | 25.3104 |
|              | Q9HZL4   | PA2990 | 9  | 38.3 | 26.887 | 68.986 | 1.06E+09 | 47  | 240  | 25.2097 | 25.4468 | 25.2666 | 25.277  | 24.7263 | 24.6867 | 25.1226 | 24.8585 |
|              | Q9HZL5   | PA2989 | 3  | 10.2 | 28.376 | 11.672 | 1.91E+08 | 14  | 254  | 24.215  | 24.0653 | 24.2831 | 24.1165 | 23.8883 | 23.9635 | 23.7759 | 23.0788 |
| system ATI   | Q9HZL7   | loId   | 4  | 48   | 24.65  | 92.148 | 1.95E+09 | 33  | 227  | 26.9076 | 27.0694 | 26.997  | 26.997  | 27.0224 | 26.9298 | 27.3388 | 27.3081 |
| 14 protein I | Q9HZM4   | PA2980 | 5  | 77   | 6.7208 | 40.865 | 5.69E+09 | 35  | 61   | 29.1363 | 27.5088 | 26.7242 | 28.8542 | 27.2333 | 28.7784 | 27.4868 | 27.9398 |
| ulosonate    | Q9HZM5   | kdsB   | 10 | 44.5 | 27.546 | 94.232 | 3.99E+09 | 59  | 254  | 26.976  | 26.9898 | 27.1856 | 26.6495 | 26.9121 | 26.9045 | 27.0789 | 26.9339 |
|              | Q9HZM6   | qtdA   | 6  | 52.6 | 17.152 | 48.289 | 3.92E+08 | 28  | 154  | 24.5824 | 21.9792 | 24.5699 | 24.7665 | 24.3109 | 23.8563 | 24.4049 | 24.818  |
| bonuclease   | Q9HZM8   | rme    | 38 | 39.4 | 117.46 | 323.31 | 5.13E+10 | 346 | 1057 | 29.3661 | 29.6506 | 29.2775 | 29.4417 | 29.7782 | 29.7446 | 29.8216 | 29.873  |
| unit pseud   | Q9HZM9   | rluC   | 8  | 26.7 | 35.641 | 28.968 | 4.75E+08 | 30  | 318  | 24.3816 | 24.5141 | 24.3769 | 24.2585 | 24.2898 | 24.6277 | 24.4245 | 24.5343 |
|              | Q9HZN0   | PA2974 | 9  | 54.8 | 25.322 | 46.418 | 9.67E+08 | 35  | 230  | 24.5718 | 25.1887 | 25.0778 | 24.4678 | 24.7912 | 25.1036 | 25.2745 | 24.895  |
|              | Q9HZN1   | PA2973 | 5  | 24.2 | 36.063 | 56.577 | 5.93E+08 | 23  | 326  | 24.9419 | 25.3695 | 23.2682 | 25.1472 | 25.6718 | 25.405  | 25.43   | 25.7693 |
| æ protein F  | Q9HZN2   | PA2972 | 8  | 58.3 | 21.054 | 53.154 | 1.93E+09 | 49  | 192  | 26.4332 | 26.7095 | 25.7432 | 26.571  | 26.8028 | 26.8082 | 26.7547 | 26.7927 |
|              | Q9HZN3   | PA2971 | 6  | 50.6 | 19.569 | 33.006 | 1.72E+09 | 32  | 178  | 27.1245 | 26.9623 | 21.8184 | 27.059  | 26.9205 | 27.3021 | 26.8496 | 27.2135 |
| isomal pro   | Q9HZN4   | rpmF   | 4  | 55   | 6.7914 | 46.994 | 8.62E+10 | 69  | 60   | 32.2442 | 32.2333 | 31.5283 | 32.2188 | 32.3711 | 32.1846 | 32.3851 | 32.1124 |
| ste acyltra  | Q9HZN5   | plxX   | 4  | 19   | 35.549 | 25.084 | 2.27E+08 | 19  | 336  | 24.0587 | 23.6917 | 24.0774 | 22.9629 | 22.539  | 23.9194 | 24.128  | 23.9043 |
|              | Q9HZN6   | pabC   | 3  | 15.1 | 29.886 | 7.8268 | 3.79E+08 | 20  | 271  | 23.9971 | 24.2086 | 24.4687 | 24.1377 | 24.046  | 24.1781 | 24.0595 | 23.8073 |
| nidylate ki  | Q9HZN8   | tmk    | 7  | 50.5 | 23.109 | 59.816 | 1.35E+09 | 38  | 210  | 25.5314 | 25.5034 | 25.039  | 25.4723 | 25.5577 | 25.6921 | 25.4765 | 25.5263 |
|              | Q9HZN9   | PA2959 | 12 | 77.9 | 28.114 | 150.8  | 5.62E+09 | 84  | 258  | 27.2027 | 26.9029 | 26.6734 | 27.2763 | 27.0769 | 27.2687 | 26.8134 | 27.1615 |
|              | Q9HZP0   | PA2958 | 7  | 30   | 42.109 | 29.442 | 4.58E+08 | 20  | 377  | 24.4405 | 25.0819 | 22.9645 | 24.77   | 25.3898 | 25.1368 | 25.9351 | 25.3946 |
|              | Q9HZP4   | PA2954 | 7  | 57.7 | 21.24  | 27.207 | 4.77E+08 | 25  | 189  | 25.157  | 25.1542 | 24.918  | 25.3424 | 23.5891 | 25.0531 | 24.923  | 24.6756 |
| rotein-ubiq  | Q9HZP5   | PA2953 | 32 | 70.8 | 59.928 | 284.94 | 4.37E+10 | 324 | 551  | 29.0065 | 29.1324 | 28.9512 | 28.8337 | 28.9864 | 24.914  | 29.0163 | 29.0914 |
| r flavoprot  | Q9HZP6   | etfB   | 13 | 74.7 | 26.376 | 204.77 | 1.23E+11 | 236 | 249  | 31.3362 | 31.3783 | 31.6877 | 31.4112 | 31.2621 | 31.3364 | 31.3765 | 31.1592 |
| flavoprote   | Q9HZP7   | etfA   | 17 | 76.7 | 31.422 | 309.48 | 1.59E+11 | 411 | 309  | 32.2302 | 32.2127 | 32.5427 | 32.3695 | 32.2502 | 32.1927 | 32.3386 | 32.0494 |
| eductase     | Q9HZP8   | PA2950 | 26 | 60.6 | 43.528 | 323.31 | 4.65E+10 | 245 | 398  | 29.6535 | 29.973  | 29.9262 | 29.5046 | 29.3534 | 29.5155 | 29.4915 | 29.6114 |
| rotein Cobl  | Q9HZQ2   | cobW   | 15 | 51.5 | 41.206 | 323.31 | 9.25E+09 | 115 | 375  | 27.4834 | 27.4466 | 27.4045 | 27.2593 | 27.322  | 27.5041 | 27.8028 | 27.5295 |
|              | Q9HZQ5   | PA2942 | 4  | 20.1 | 36.545 | 36.118 | 4.03E+08 | 23  | 338  | 24.3382 | 24.347  | 24.8615 | 24.122  | 24.4455 | 24.6165 | 24.2635 | 24.6423 |
|              | Q9HZR5   | morB   | 9  | 47.7 | 39.631 | 85.21  | 1.03E+09 | 62  | 369  | 24.9862 | 24.642  | 24.9239 | 25.1251 | 24.9612 | 24.8683 | 24.8822 | 24.7845 |
|              | Q9HZS9   | PA2918 | 3  | 22.2 | 26.738 | 18.165 | 4.82E+08 | 27  | 257  | 24.9592 | 24.9802 | 25.1548 | 24.7625 | 25.2915 | 25.2158 | 25.1843 | 24.9703 |
|              | Q9HZT2   | PA2915 | 8  | 49.3 | 32.013 | 74.381 | 1.01E+09 | 43  | 288  | 25.1832 | 25.2888 | 25.7112 | 25.1629 | 25.4669 | 25.6225 | 25.9597 | 25.7235 |
| 1-8X methy   | Q9HZU2   | cobH   | 5  | 24   | 21.65  | 30.371 | 1.07E+09 | 31  | 208  | 25.4974 | 25.6483 | 25.6282 | 25.5576 | 25.6955 | 25.6186 | 25.9496 | 25.6834 |
| [20]-methy   | Q9HZU3   | cobI   | 7  | 42.4 | 27.274 | 38.398 | 9.25E+08 | 35  | 250  | 25.7839 | 25.8072 | 25.8225 | 25.6621 | 25.51   | 25.887  | 25.7661 | 25.6209 |
|              | Q9HZU4   | cobJ   | 3  | 8.4  | 58.982 | 11.907 | 79832000 | 12  | 559  | 23.8387 | 22.9542 | 22.3334 | 22.9796 | 22.2879 | 23.1738 | 23.0468 | 23.3131 |
|              | Q9HZU5   | PA2902 | 8  | 35.5 | 30.448 | 62.753 | 7.95E+08 | 16  | 282  | 25.9929 | 26.2204 | 23.0691 | 26.6439 | 21.829  | 25.5516 | 23.4946 | 25.6729 |
|              | Q9HZW2   | atuA   | 4  | 29.3 | 22.057 | 47.444 | 1.14E+09 | 33  | 198  | 26.0255 | 26.2189 | 26.6305 | 25.8384 | 25.9013 | 25.5593 | 23.3364 | 25.4384 |
|              | Q9HZX5   | PA2871 | 8  | 44.2 | 28.695 | 53.46  | 1.57E+09 | 50  | 265  | 25.3073 | 25.5934 | 25.4565 | 25.5394 | 25.8893 | 25.4251 | 25.6529 | 25.4282 |
|              | Q9HZY0   | mttC   | 5  | 30.3 | 29.544 | 75.008 | 6.54E+08 | 23  | 267  | 25.1471 | 25.1531 | 23.1771 | 25.4389 | 25.4791 | 25.4023 | 25.1198 | 25.0593 |
| elongatio    | Q9HZY5   | greB   | 6  | 42.9 | 19.144 | 37.176 | 6.16E+08 | 22  | 168  | 25.1148 | 23.1957 | 24.8592 | 25.2134 | 25.5744 | 25.5047 | 25.6444 | 25.1958 |
|              | Q9HZY7   | PA2857 | 7  | 46.3 | 24.585 | 63.884 | 1.47E+09 | 48  | 227  | 25.5533 | 25.8423 | 26.2661 | 25.5105 | 26.2609 | 26.3997 | 26.3036 | 25.9971 |
| terase Tes   | Q9HZY8   | tesA   | 5  | 51.2 | 21.037 | 55.471 | 1.28E+09 | 45  | 201  | 26.3699 | 25.3785 | 25.1471 | 26.2427 | 25.3275 | 25.9718 | 25.8227 | 25.94   |
|              | Q9HZZ0   | PA2854 | 16 | 59.8 | 34.799 | 116.22 | 1.49E+10 | 147 | 323  | 28.1609 | 28.419  | 28.3034 | 28.1182 | 27.9432 | 27.9783 | 28.0472 | 28.0169 |
| gation fact  | Q9HZZ2   | efp    | 9  | 38.3 | 20.985 | 80.928 | 9.93E+10 | 119 | 188  | 31.5017 | 31.7483 | 31.4751 | 31.6815 | 31.7598 | 31.6797 | 31.558  | 31.5754 |
|              | Q9HZZ3   | ohr    | 5  | 54.2 | 14.522 | 98.69  | 6.43E+09 | 40  | 142  | 28.1998 | 27.9718 | 27.4882 | 28.1851 | 28.2197 | 28.5638 | 28.542  | 28.6352 |
| ent RNA h    | Q9I000   | PA2843 | 11 | 35.9 | 49.851 | 30.947 | 4.71E+08 | 23  | 448  | 24.9428 | 24.8766 | 23.0302 | 25.4438 | 23.6146 | 25.1236 | 24.843  | 25.3104 |
| : S-methylt  | Q9I003   | deaD   | 26 | 54.9 | 62.107 | 190.04 | 1.3E+10  | 186 | 567  | 27.7622 | 28.0878 | 27.8946 | 27.7085 | 27.7739 | 27.9001 | 27.9041 | 28.0161 |
|              | Q9I011   | tpm    | 6  | 49.5 | 24.875 | 14.035 | 5.22E+08 | 22  | 218  | 25.2902 | 23.0612 | 25.3819 | 25.1424 | 25.1322 | 25.2859 | 25.4558 | 25.166  |
|              | Q9I012   | PA2831 | 12 | 49.2 | 42.933 | 89.604 | 1.67E+09 | 59  | 375  | 26.1102 | 26.2791 | 26.2832 | 26.2164 | 26.207  | 26.0252 | 25.968  | 25.9239 |
|              | Q9I014   | PA2829 | 6  | 56.7 | 16.431 | 27.592 | 3.84E+08 | 23  | 150  | 24.4372 | 24.1316 | 24.4244 | 24.3927 | 24.7485 | 24.5867 | 24.8094 | 24.5049 |
|              | Q9I015   | PA2828 | 13 | 53.8 | 44.799 | 113.22 | 6.89E+09 | 100 | 403  | 27.3151 | 26.9408 | 26.9283 | 27.4771 | 27.7879 | 27.6191 | 27.4114 | 27.3774 |
| hione pero   | Q9I017   | PA2826 | 6  | 53.4 | 17.659 | 35.335 | 1.6E+09  | 38  | 161  | 26.5456 | 26.9409 | 26.9797 | 26.5071 | 26.5483 | 26.7566 | 26.8339 | 26.575  |
|              | Q9I020   | PA2823 | 12 | 50   | 33.792 | 118.1  | 5.49E+09 | 82  | 26   | 27.5433 | 27.7291 | 27.9856 | 27.4322 | 27.6473 | 27.8035 | 27.8888 | 27.8149 |
|              | Q9I021</ |        |    |      |        |        |          |     |      |         |         |         |         |         |         |         |         |

|                                                       |        |             |    |      |        |        |          |     |      |         |         |         |         |         |         |         |         |
|-------------------------------------------------------|--------|-------------|----|------|--------|--------|----------|-----|------|---------|---------|---------|---------|---------|---------|---------|---------|
| age system<br>genase (de<br>ase 1;Serin<br>nethlytran | Q9I0V3 | PA20250     | 9  | 37.2 | 48.959 | 79.317 | 9.55E+08 | 45  | 441  | 25.7907 | 25.5357 | 25.8453 | 25.2715 | 26.1856 | 25.8123 | 25.8687 | 25.9544 |
|                                                       | Q9I0Z0 | mexT        | 3  | 12.7 | 38.222 | 18.058 | 2.2E+08  | 14  | 347  | 22.2821 | 24.4896 | 24.6342 | 24.2621 | 23.0266 | 24.1063 | 24.5928 | 24.3527 |
|                                                       | Q9I0Z9 | PA2483      | 9  | 57.1 | 36.102 | 47.687 | 7.35E+08 | 48  | 333  | 25.0704 | 24.1521 | 24.7448 | 24.5808 | 24.5456 | 24.6923 | 24.6545 | 25.0705 |
|                                                       | Q9I118 | PA2464      | 5  | 47.1 | 17.626 | 14.585 | 5.65E+08 | 16  | 174  | 24.8516 | 24.7566 | 24.1738 | 25.2107 | 25.4906 | 25.1319 | 24.9509 | 24.9977 |
|                                                       | Q9I127 | PA2455      | 3  | 22.3 | 20.332 | 9.3627 | 1.85E+08 | 10  | 175  | 23.2455 | 23.9746 | 23.542  | 24.0913 | 24.3125 | 23.9538 | 23.6013 | 22.8691 |
|                                                       | Q9I136 | gcvH1       | 3  | 22.8 | 13.793 | 11.284 | 5.21E+09 | 29  | 127  | 28.7609 | 28.3069 | 27.1654 | 28.6564 | 27.297  | 28.4705 | 27.0848 | 28.1027 |
|                                                       | Q9I137 | gcvP1       | 30 | 46   | 103.92 | 286.25 | 5.56E+09 | 167 | 959  | 26.197  | 26.7832 | 25.5809 | 26.6041 | 26.4213 | 26.4268 | 25.9185 | 26.7484 |
|                                                       | Q9I138 | glyA1,glyA2 | 11 | 37.6 | 44.973 | 143.52 | 2.83E+09 | 82  | 418  | 26.5257 | 26.487  | 26.5922 | 26.1168 | 25.6888 | 26.2123 | 25.6894 | 25.851  |
|                                                       | Q9I140 | gcvT2       | 18 | 65.7 | 39.882 | 157.51 | 2.65E+10 | 166 | 373  | 29.0345 | 29.1477 | 29.29   | 29.0827 | 28.833  | 28.9134 | 28.7915 | 28.6642 |
|                                                       | Q9I192 | fpvR        | 3  | 15.1 | 37.022 | 18.899 | 3.46E+08 | 16  | 331  | 24.1716 | 24.3267 | 24.2908 | 24.628  | 24.6189 | 24.782  | 24.8057 | 24.6359 |
| l7 protein i<br>'1 protein i                          | Q9I1A0 | PA2379      | 6  | 58.3 | 16.618 | 54.083 | 7.62E+08 | 34  | 156  | 25.1128 | 24.9608 | 23.4526 | 24.8318 | 25.6325 | 25.4382 | 25.4165 | 25.3217 |
|                                                       | Q9I1A1 | PA2378      | 20 | 42.8 | 83.665 | 152    | 3.49E+09 | 88  | 771  | 26.2319 | 26.2063 | 24.5283 | 26.1066 | 26.8879 | 26.5853 | 26.577  | 26.5943 |
|                                                       | Q9I1F5 | PA2323      | 16 | 49.5 | 59.96  | 107.24 | 1.98E+09 | 78  | 541  | 26.1361 | 26.4881 | 26.1    | 26.3193 | 25.6751 | 25.6439 | 25.7719 | 26.1588 |
|                                                       | Q9I1F6 | gntR        | 9  | 32.7 | 37.147 | 26.859 | 4.12E+08 | 24  | 343  | 23.0806 | 24.7342 | 25.0573 | 24.7984 | 24.3437 | 24.6901 | 24.4541 | 24.6811 |
|                                                       | Q9I1F8 | PA2317      | 6  | 24.5 | 47.855 | 30.961 | 5.71E+08 | 28  | 432  | 25.3604 | 25.3253 | 25.1671 | 24.7271 | 24.4893 | 24.4324 | 22.5685 | 24.7766 |
|                                                       | Q9I1H4 | PA2301      | 6  | 42.2 | 19.33  | 23.787 | 3.19E+08 | 25  | 180  | 24.2821 | 24.2122 | 24.298  | 24.1017 | 24.1165 | 24.3117 | 24.4012 | 24.0632 |
|                                                       | Q9I1I5 | gcd         | 8  | 16.6 | 86.217 | 45.453 | 5.19E+08 | 33  | 803  | 24.2431 | 25.0158 | 23.6977 | 24.9942 | 24.5647 | 23.0348 | 23.7121 | 24.5181 |
|                                                       | Q9I1K9 | PA2264      | 10 | 64.3 | 26.358 | 53.068 | 2.84E+09 | 40  | 238  | 28.0097 | 27.4373 | 26.2961 | 28.1827 | 26.3749 | 26.6832 | 26.1317 | 26.7574 |
|                                                       | Q9I1L6 | ansA        | 7  | 30.5 | 34.755 | 36.784 | 8.34E+08 | 32  | 328  | 25.212  | 25.2006 | 25.1587 | 25.0187 | 24.8291 | 25.3747 | 25.272  | 25.5023 |
|                                                       | Q9I1I9 | lpdV        | 29 | 81   | 48.588 | 323.31 | 6.34E+09 | 97  | 464  | 25.2096 | 27.0905 | 28.9368 | 24.61   | 24.623  | 23.1696 | 25.586  | 23.7051 |
| poyl dehyd                                            | Q9I1P0 | PA2229      | 6  | 33.5 | 26.56  | 53.083 | 1.37E+09 | 30  | 239  | 26.2076 | 26.1108 | 26.0889 | 26.552  | 26.3701 | 26.4874 | 26.0746 | 26.4317 |
|                                                       | Q9I1R3 | PA2204      | 22 | 74.6 | 29.308 | 173.37 | 1.03E+10 | 141 | 268  | 27.6846 | 27.7954 | 27.3361 | 27.7952 | 27.5688 | 27.5181 | 27.5523 | 27.5261 |
|                                                       | Q9I1R8 | PA2199      | 5  | 26.8 | 30.886 | 53.44  | 8.86E+08 | 34  | 291  | 25.1191 | 25.1289 | 25.6795 | 25.438  | 25.7147 | 25.0948 | 25.1261 | 25.2246 |
|                                                       | Q9I1S0 | PA2197      | 14 | 54.2 | 37.135 | 81.716 | 1.99E+09 | 84  | 345  | 25.9912 | 25.9237 | 26.1648 | 25.8022 | 25.6666 | 25.6213 | 25.793  | 25.4734 |
|                                                       | Q9I1Z9 | PA2116      | 8  | 38.1 | 29.221 | 57.867 | 4.12E+09 | 76  | 265  | 27.4819 | 27.7818 | 27.9646 | 27.0689 | 27.141  | 27.374  | 27.6002 | 27.3418 |
|                                                       | Q9I203 | PA2112      | 14 | 82.2 | 26.334 | 191.66 | 1.47E+10 | 131 | 247  | 28.5538 | 28.5455 | 28.5458 | 28.3522 | 28.1278 | 28.6722 | 28.6792 | 28.5412 |
|                                                       | Q9I204 | PA2111      | 10 | 47.7 | 26.218 | 81.769 | 2.57E+09 | 62  | 237  | 25.6971 | 26.0111 | 26.0052 | 25.8046 | 25.9836 | 25.8951 | 25.8665 | 25.5984 |
|                                                       | Q9I205 | PA2110      | 3  | 11.8 | 33.06  | 13.48  | 5.96E+08 | 19  | 313  | 24.7717 | 25.3443 | 25.4161 | 24.9424 | 24.9645 | 25.2386 | 25.5399 | 25.5759 |
|                                                       | Q9I244 | fusB        | 32 | 65.7 | 77.573 | 196.28 | 6.4E+09  | 144 | 702  | 26.7166 | 26.8868 | 27.0842 | 26.6804 | 27.4638 | 27.1896 | 27.6299 | 27.1168 |
|                                                       | Q9I271 | PA2044      | 33 | 67.3 | 70.083 | 323.31 | 1.32E+10 | 218 | 624  | 27.776  | 27.814  | 28.0698 | 27.9166 | 27.6287 | 27.4101 | 27.6079 | 27.4628 |
| nosphate u                                            | Q9I275 | PA2040      | 9  | 42.1 | 50.931 | 22.956 | 5.29E+08 | 15  | 458  | 24.9121 | 24.7487 | 24.3675 | 24.9514 | 25.5606 | 26.0557 | 23.4181 | 26.0321 |
|                                                       | Q9I291 | galU        | 17 | 69.9 | 31.236 | 195.25 | 2.22E+10 | 144 | 279  | 29.1758 | 29.1903 | 29.1551 | 29.1685 | 29.3948 | 29.574  | 29.8511 | 29.7061 |
|                                                       | Q9I297 | liuB        | 8  | 25.6 | 57.433 | 28.574 | 5.44E+08 | 28  | 535  | 24.5101 | 24.6567 | 24.5758 | 24.5896 | 24.5297 | 24.2897 | 24.5102 | 24.3535 |
|                                                       | Q9I299 | liuD        | 13 | 30.8 | 71.282 | 53.263 | 9.83E+08 | 35  | 655  | 25.6392 | 25.9642 | 26.2999 | 22.5565 | 25.348  | 25.1618 | 25.652  | 25.4297 |
|                                                       | Q9I2A2 | fahA        | 4  | 16   | 46.341 | 25.574 | 4.88E+08 | 22  | 432  | 24.8962 | 24.9694 | 24.9144 | 24.6105 | 24.8001 | 24.8948 | 24.9835 | 24.7482 |
|                                                       | Q9I2A8 | atoB        | 20 | 75.1 | 40.405 | 269.78 | 8.96E+09 | 168 | 393  | 27.2095 | 27.0705 | 27.4822 | 26.8054 | 26.9144 | 26.5708 | 26.8861 | 26.5057 |
|                                                       | Q9I2E0 | PA1964      | 14 | 48.4 | 57.917 | 86.026 | 1.72E+09 | 45  | 521  | 26.9802 | 27.2361 | 26.5482 | 26.2462 | 26.2577 | 27.6952 | 26.895  | 27.4311 |
|                                                       | Q9I2F4 | rbtK        | 6  | 27.9 | 31.846 | 41.434 | 3.07E+08 | 26  | 308  | 24.1166 | 24.3978 | 24.364  | 24.2405 | 23.8949 | 23.9553 | 24.1514 | 23.9222 |
|                                                       | Q9I2P3 | PA1852      | 3  | 52.7 | 9.97   | 46.929 | 5.35E+08 | 21  | 91   | 24.573  | 23.7877 | 22.9871 | 24.9169 | 24.7117 | 25.6216 | 24.9343 | 25.7335 |
|                                                       | Q9I2P8 | nfuA        | 6  | 44.3 | 21.136 | 103.42 | 5.16E+09 | 51  | 194  | 28.5655 | 28.7706 | 27.2825 | 28.8686 | 27.9725 | 28.2943 | 27.8359 | 28.4545 |
| enesis prot<br>ionine syn                             | Q9I2Q2 | metH        | 22 | 31.4 | 135.06 | 89.763 | 1E+09    | 78  | 1234 | 25.3419 | 25.073  | 22.546  | 25.0926 | 25.7741 | 25.6806 | 25.1891 | 25.24   |
|                                                       | Q9I2Q7 | cysI        | 26 | 59.2 | 62.132 | 189.69 | 6.14E+09 | 145 | 552  | 26.6417 | 26.7021 | 26.2736 | 26.9575 | 27.1213 | 26.9989 | 26.7419 | 26.7064 |
|                                                       | Q9I2Q8 | PA1837      | 7  | 57   | 18.765 | 150.17 | 2.5E+09  | 53  | 165  | 26.8707 | 27.0434 | 27.163  | 27.0954 | 27.4506 | 27.2749 | 27.3246 | 26.9113 |
|                                                       | Q9I2R2 | PA1833      | 14 | 58.5 | 34.551 | 120.75 | 8E+09    | 100 | 330  | 27.6394 | 27.6466 | 27.9331 | 27.4927 | 27.2893 | 27.1514 | 27.2749 | 27.0376 |
|                                                       | Q9I2R5 | PA1830      | 5  | 63.5 | 11.11  | 28.27  | 1.02E+10 | 46  | 104  | 29.9074 | 28.2792 | 27.5519 | 29.9109 | 27.6152 | 29.727  | 28.7862 | 29.5747 |
|                                                       | Q9I2R7 | PA1828      | 9  | 49.4 | 26.919 | 74.277 | 2.85E+09 | 51  | 255  | 26.6661 | 26.8449 | 26.6407 | 26.4819 | 26.3306 | 26.207  | 26.4297 | 26.4816 |
|                                                       | Q9I2S3 | fimL        | 16 | 47.9 | 60.868 | 84.927 | 2.31E+09 | 87  | 562  | 26.1565 | 25.9268 | 26.0071 | 25.8324 | 25.9651 | 26.1355 | 26.0068 | 26.4558 |
|                                                       | Q9I2S4 | PA1821      | 8  | 41.9 | 29.989 | 72.215 | 1.44E+09 | 53  | 270  | 25.4713 | 25.6619 | 25.705  | 25.0573 | 25.8998 | 25.5848 | 25.6147 | 25.5965 |
|                                                       | Q9I2S7 | ldcA        | 16 | 33.4 | 82.756 | 72.976 | 9.66E+08 | 75  | 751  | 24.7491 | 24.8042 | 24.542  | 25.0338 | 24.8819 | 25.0048 | 25.0292 | 25.165  |
|                                                       | Q9I2S9 | rmhA        | 8  | 58.1 | 16.697 | 67.95  | 1.18E+09 | 37  | 148  | 25.6251 | 25.5553 | 25.5847 | 25.4986 | 25.5262 | 25.6308 | 26.5266 | 25.636  |
| xonuclease<br>lglutathion                             | Q9I2T1 | glbB        | 8  | 45   | 28.865 | 41.275 | 1.12E+09 | 46  | 258  | 25.9131 | 24.8486 | 25.3861 | 25.9331 | 25.4495 | 25.5395 | 25.8472 | 25.3864 |
|                                                       | Q9I2T4 | PA1810      | 27 | 56.1 | 70.473 | 167.73 | 4.88E+09 | 148 | 615  | 26.2847 | 26.4328 | 26.5416 | 26.5084 | 26.9543 | 26.615  | 26.6026 | 26.2677 |
|                                                       | Q9I2T8 | ppdI        | 29 | 55.7 | 68.741 | 290.96 | 9.96E+09 | 158 | 621  | 27.2728 | 27.4441 | 26.9023 | 27.5318 | 27.526  | 27.4103 | 27.3135 | 27.631  |
|                                                       | Q9I2T9 | lon         | 51 | 60.8 | 88.646 | 323.31 | 1.61E+10 | 332 | 798  | 27.3853 | 27.5126 | 27.309  | 27.4601 | 27.5443 | 27.4566 | 27.5774 | 27.5774 |
|                                                       | Q9I2U0 | clpX        | 24 | 66   | 46.991 | 217.62 | 3.64E+10 | 256 | 426  | 29.5141 | 29.6672 | 29.6633 | 29.2883 | 29.521  | 29.655  | 29.7338 | 29.609  |
|                                                       | Q9I2U1 | clpP1       | 2  | 18.8 | 23.502 | 46.733 | 1.64E+10 | 44  | 213  | 29.425  | 30.0884 | 28.8562 | 29.8796 | 30.0948 | 30.0549 | 29.8054 | 30.0718 |
|                                                       | Q9I2U2 | tig         | 41 | 87.4 | 48.58  |        |          |     |      |         |         |         |         |         |         |         |         |

|              |        |           |    |      |        |        |          |     |     |         |         |         |         |         |         |         |         |
|--------------|--------|-----------|----|------|--------|--------|----------|-----|-----|---------|---------|---------|---------|---------|---------|---------|---------|
| pyruvate is  | Q9I3K8 | PA1504    | 5  | 31   | 24.179 | 21.556 | 3E+08    | 13  | 216 | 24.293  | 24.5967 | 24.5134 | 23.6687 | 24.5598 | 23.8824 | 24.1926 | 24.4329 |
|              | Q9I3L1 | PA1501    | 4  | 27.7 | 29.203 | 4.4535 | 86237000 | 15  | 260 | 23.8058 | 23.1161 | 23.4936 | 24.1089 | 23.2818 | 23.4504 | 22.8969 | 23.5341 |
|              | Q9I3L8 | PA1494    | 21 | 50.3 | 60.65  | 156.75 | 4.14E+09 | 112 | 551 | 26.1124 | 26.1685 | 26.4059 | 26.3697 | 26.4065 | 26.1813 | 26.9909 | 26.0447 |
|              | Q9I3I9 | cysP      | 12 | 50.9 | 36.517 | 110.04 | 1.69E+09 | 76  | 332 | 25.7083 | 25.3836 | 22.8155 | 25.7582 | 26.123  | 25.789  | 24.015  | 25.5947 |
| s ATP-bindi  | Q9I3N7 | ccmA      | 6  | 39.5 | 24.995 | 72.111 | 8.21E+08 | 37  | 233 | 24.9798 | 25.027  | 24.4601 | 24.803  | 25.2933 | 25.1131 | 25.0752 | 25.3772 |
|              | Q9I3N8 | PA1474    | 10 | 42.3 | 52.688 | 71.004 | 4.64E+08 | 49  | 492 | 25.1181 | 24.5594 | 24.9839 | 24.0464 | 23.5919 | 24.5373 | 24.2997 | 24.5628 |
|              | Q9I3Q7 | PA1440    | 5  | 51.8 | 22.382 | 61.935 | 5.84E+09 | 57  | 195 | 28.7281 | 28.1593 | 28.5463 | 28.8119 | 28.4836 | 28.47   | 28.2763 | 28.6698 |
|              | Q9I3S7 | PA1417    | 11 | 39.2 | 57.29  | 36.609 | 6.01E+08 | 34  | 533 | 24.4042 | 23.9764 | 24.5784 | 24.3898 | 24.6147 | 24.6031 | 24.2148 | 24.5974 |
| r phosphate  | Q9I3T4 | PA1410    | 8  | 32   | 40.451 | 27.164 | 4.88E+08 | 32  | 363 | 24.8465 | 24.7507 | 24.937  | 24.6003 | 24.6822 | 24.8224 | 25.028  | 25.0097 |
|              | Q9I3T5 | aphA      | 10 | 51.2 | 37.953 | 56.679 | 8.44E+08 | 35  | 346 | 24.8274 | 24.9948 | 24.7743 | 24.8543 | 25.3613 | 25.3555 | 25.0107 | 25.2341 |
|              | Q9I3U2 | PA1402    | 8  | 53.4 | 23.753 | 27.311 | 1.06E+09 | 36  | 221 | 26.5189 | 26.47   | 26.5881 | 26.4399 | 26.1585 | 26.3937 | 26.8765 | 26.0479 |
|              | Q9I3W9 | pdxB      | 7  | 26.6 | 41.001 | 35.805 | 1.32E+09 | 40  | 380 | 25.5914 | 25.6851 | 25.8743 | 25.9463 | 26.2538 | 26.0736 | 26.2519 | 25.8396 |
| carrier-pro  | Q9I3X1 | fabF2     | 8  | 34.6 | 43.485 | 27.118 | 4.39E+08 | 25  | 422 | 25.3005 | 24.8237 | 25.1523 | 24.4212 | 25.0344 | 24.7343 | 24.9588 | 25.0457 |
|              | Q9I400 | PA1344    | 11 | 48.1 | 27.397 | 81.45  | 2.52E+09 | 51  | 264 | 26.2632 | 26.7551 | 26.9866 | 26.2448 | 26.5437 | 26.3536 | 26.9504 | 26.2117 |
|              | Q9I405 | I339;PA41 | 10 | 52.9 | 26.916 | 47.219 | 1.83E+09 | 54  | 244 | 26.3073 | 26.4709 | 26.5613 | 26.0378 | 26.1472 | 26.0755 | 25.985  | 26.4598 |
|              | Q9I406 | ggT       | 24 | 50.4 | 59.873 | 181.51 | 1.01E+10 | 168 | 557 | 28.111  | 27.9919 | 27.5444 | 28.1736 | 27.9468 | 27.9276 | 27.5404 | 27.8437 |
| peptidase    | Q9I437 | PA1307    | 8  | 43.6 | 28.544 | 80.707 | 1.83E+09 | 45  | 257 | 26.6655 | 26.8087 | 26.7461 | 26.6621 | 26.8227 | 26.5224 | 26.6406 | 26.4057 |
|              | Q9I445 | PA1299    | 3  | 36.2 | 17.234 | 15.535 | 1.84E+08 | 14  | 149 | 24.0685 | 22.4678 | 23.9876 | 24.6201 | 24.1642 | 23.8425 | 23.1396 | 24.047  |
|              | Q9I446 | PA1298    | 2  | 38.5 | 10.023 | 11.652 | 2.53E+08 | 12  | 91  | 24.8587 | 23.1192 | 25.0678 | 23.3229 | 24.304  | 24.1272 | 24.679  | 24.6585 |
|              | Q9I449 | PA1295    | 2  | 49.5 | 11.361 | 20.929 | 1.86E+09 | 17  | 97  | 27.2933 | 26.3401 | 25.4938 | 27.2527 | 26.572  | 27.3016 | 26.7222 | 27.6438 |
| sonuclease   | Q9I450 | rml       | 16 | 61.8 | 43.098 | 141.08 | 3.55E+09 | 90  | 374 | 25.8967 | 26.0097 | 26.0165 | 25.9933 | 26.1139 | 26.4599 | 26.2059 | 26.3059 |
|              | Q9I451 | PA1293    | 5  | 28.6 | 38.794 | 24.365 | 1.77E+08 | 16  | 353 | 22.652  | 22.7405 | 24.0559 | 24.1665 | 24.1945 | 24.0017 | 24.1439 | 24.3111 |
|              | Q9I452 | sseA      | 7  | 45.8 | 30.597 | 70.935 | 1.44E+09 | 36  | 284 | 26.807  | 26.5464 | 26.4409 | 26.5154 | 23.0418 | 26.1128 | 26.0031 | 26.2962 |
|              | Q9I461 | PA1283    | 3  | 24.7 | 20.307 | 7.6533 | 2.51E+08 | 15  | 186 | 22.8064 | 24.7967 | 25.0167 | 24.7366 | 25.3664 | 25.2515 | 22.9477 | 23.0452 |
| bala min bi  | Q9I466 | cobP      | 8  | 64.2 | 18.862 | 60.848 | 8.8E+08  | 35  | 173 | 24.6857 | 24.5306 | 24.6447 | 24.8831 | 24.9725 | 25.0559 | 24.9408 | 24.8582 |
|              | Q9I472 | cobO      | 5  | 36.5 | 22.292 | 31.866 | 2.29E+09 | 27  | 203 | 26.5901 | 26.8924 | 26.9702 | 26.7191 | 26.9633 | 27.1385 | 27.1083 | 26.8937 |
|              | Q9I4A4 | PA1234    | 3  | 33.5 | 18.46  | 13.724 | 5.56E+08 | 20  | 167 | 25.7486 | 25.4152 | 25.4853 | 25.7889 | 25.5318 | 23.4713 | 25.4957 | 25.4949 |
|              | Q9I482 | PA1226    | 7  | 50   | 22.308 | 44.483 | 5.86E+08 | 40  | 202 | 24.4849 | 24.6965 | 24.3331 | 24.4839 | 24.3502 | 24.5092 | 24.4656 | 24.649  |
| in 2,3-diox  | Q9I4D2 | PA1206    | 9  | 79.6 | 17.69  | 84.821 | 3.85E+09 | 73  | 157 | 26.5966 | 26.5777 | 26.0081 | 26.4695 | 26.4074 | 26.6262 | 26.5474 | 26.5598 |
|              | Q9I4D3 | PA1205    | 6  | 31.4 | 34.455 | 34.388 | 7.03E+08 | 30  | 315 | 25.8718 | 26.069  | 26.0157 | 26.1397 | 25.3683 | 25.4782 | 25.7404 | 23.8187 |
|              | Q9I4D4 | PA1204    | 4  | 40.5 | 20.224 | 47.987 | 1.34E+09 | 21  | 185 | 26.2767 | 26.0395 | 26.4083 | 26.1724 | 26.1578 | 25.7421 | 25.6786 | 25.5395 |
|              | Q9I4D5 | PA1203    | 3  | 26.7 | 14.681 | 13.362 | 5.86E+08 | 18  | 135 | 23.2713 | 25.4981 | 22.9827 | 26.2299 | 24.8758 | 25.6307 | 24.5437 | 25.5728 |
| ent protei   | Q9I4E1 | cobB2     | 4  | 27   | 27.686 | 28.846 | 2.69E+08 | 17  | 256 | 24.3481 | 24.3075 | 23.8557 | 24.0624 | 24.7994 | 24.2912 | 24.1553 | 23.9847 |
|              | Q9I4E6 | ttcA      | 6  | 27.7 | 31.26  | 30.696 | 7.89E+08 | 40  | 274 | 24.9029 | 24.8074 | 25.242  | 24.6537 | 25.1231 | 25.311  | 25.1032 | 25.4147 |
|              | Q9I4F8 | phoQ      | 4  | 12.7 | 50.28  | 17.185 | 84879000 | 15  | 448 | 23.1251 | 23.4832 | 23.6455 | 22.5679 | 23.2236 | 23.6534 | 23.1262 | 22.9372 |
|              | Q9I4F9 | phoP      | 18 | 75.1 | 25.65  | 323.31 | 4.73E+10 | 216 | 225 | 29.7703 | 29.6675 | 29.9369 | 29.64   | 30.1879 | 30.2748 | 30.4041 | 30.1587 |
| noplimate    | Q9I4H3 | PA1164    | 4  | 27.4 | 28.898 | 29.615 | 5.3E+08  | 21  | 270 | 25.1474 | 25.1756 | 25.1493 | 25.0452 | 24.9458 | 25.0257 | 22.3095 | 25.176  |
|              | Q9I4H5 | dapE      | 13 | 53.3 | 41.077 | 128.53 | 1.02E+10 | 119 | 383 | 27.5207 | 27.6707 | 27.5833 | 27.611  | 27.7507 | 27.8669 | 27.9872 | 27.7323 |
|              | Q9I4H6 | rrmA      | 8  | 36.7 | 29.644 | 16.209 | 4.34E+08 | 20  | 267 | 24.5689 | 24.376  | 24.5666 | 24.3968 | 24.4717 | 24.3244 | 24.6733 | 24.3815 |
|              | Q9I4H7 | PA1160    | 6  | 79.5 | 14.042 | 53.816 | 1.49E+09 | 34  | 127 | 26.5212 | 26.0957 | 25.6019 | 26.6893 | 26.2552 | 26.3656 | 25.9451 | 26.256  |
| osphate rei  | Q9I4I8 | PA1159    | 4  | 50.7 | 7.7246 | 40.226 | 2.12E+10 | 44  | 69  | 29.6866 | 29.727  | 29.4484 | 29.7408 | 29.9562 | 29.9839 | 30.1019 | 29.7582 |
|              | Q9I4I2 | nrdB      | 20 | 69.9 | 47.386 | 252.44 | 1.54E+10 | 141 | 415 | 28.5579 | 28.5455 | 27.8782 | 28.9056 | 29.0811 | 28.9691 | 28.8284 | 28.8371 |
|              | Q9I4J5 | PA1140    | 6  | 43.9 | 31.614 | 58.921 | 1.84E+09 | 43  | 278 | 25.7937 | 26.2375 | 25.9709 | 25.3868 | 26.1024 | 25.9624 | 25.9736 | 25.8734 |
|              | Q9I4J6 | PA1139    | 4  | 32.6 | 29.336 | 28.53  | 4.16E+08 | 14  | 282 | 25.9375 | 23.9299 | 23.0807 | 25.8824 | 22.287  | 24.8363 | 23.809  | 24.5616 |
| specific AT  | Q9I4K8 | PA1127    | 22 | 76.6 | 36.474 | 275.62 | 2.3E+10  | 202 | 329 | 29.4182 | 29.5193 | 29.8739 | 29.6292 | 29.4535 | 29.2982 | 29.5299 | 28.9969 |
|              | Q9I4L8 | PA1117    | 5  | 72.6 | 13.589 | 20.361 | 2.46E+08 | 21  | 124 | 23.8236 | 23.7692 | 23.2204 | 24.347  | 24.1885 | 24.2483 | 23.6431 | 23.7296 |
|              | Q9I4L9 | PA1116    | 6  | 29   | 31.308 | 23.884 | 3.84E+08 | 20  | 279 | 24.6928 | 24.2552 | 24.9419 | 24.9581 | 24.8207 | 25.0196 | 25.0092 | 24.5939 |
|              | Q9I4N1 | filI      | 11 | 36.4 | 48.38  | 33.706 | 3.6E+08  | 25  | 451 | 22.5848 | 24.5393 | 24.6537 | 24.4154 | 24.732  | 24.7307 | 23.5937 | 24.1806 |
| lar P-ring p | Q9I4N3 | fleR      | 17 | 51.8 | 51.234 | 83.763 | 1.93E+09 | 83  | 473 | 25.7942 | 25.8224 | 26.0961 | 25.6743 | 25.8134 | 25.9552 | 25.891  | 25.9083 |
|              | Q9I4P5 | flgI      | 14 | 57.2 | 38.18  | 72.387 | 2.26E+09 | 78  | 369 | 25.5801 | 25.6291 | 25.4228 | 25.7382 | 25.4432 | 25.7118 | 25.4105 | 25.6837 |
|              | Q9I4P9 | flgE      | 9  | 50.4 | 48.335 | 113.93 | 1.44E+09 | 55  | 462 | 25.4602 | 25.6532 | 25.3303 | 25.9012 | 25.9917 | 25.9397 | 26.1108 | 25.9392 |
|              | Q9I4Q0 | flgD      | 4  | 38.8 | 24.85  | 42.265 | 4.53E+08 | 25  | 237 | 25.1871 | 25.0089 | 23.844  | 25.1911 | 25.2177 | 24.7987 | 25.2215 | 25.2025 |
| lazole-succ  | Q9I4Q4 | PA1075    | 3  | 58.1 | 11.337 | 17.359 | 5.76E+08 | 25  | 105 | 25.6107 | 23.2683 | 23.7947 | 26.2314 | 24.4008 | 25.7601 | 24.9137 | 25.5242 |
|              | Q9I4Q5 | PA1069    | 12 | 25.4 | 86.114 | 35.952 | 3.75E+08 | 37  | 764 | 23.6312 | 23.9046 | 24.377  | 24.1056 | 24.9862 | 24.3296 | 24.7095 | 24.     |

|                        |        |              |      |        |        |          |          |     |         |         |         |         |         |         |         |         |         |
|------------------------|--------|--------------|------|--------|--------|----------|----------|-----|---------|---------|---------|---------|---------|---------|---------|---------|---------|
|                        | Q9IS77 | PA0601       | 7    | 55.7   | 22.9   | 25.107   | 3.07E+08 | 21  | 210     | 23.9538 | 24.454  | 24.4723 | 24.1725 | 23.5834 | 24.0023 | 23.35   | 23.931  |
|                        | Q9IS79 | PA0599       | 3    | 14.2   | 37.979 | 15.382   | 4.83E+08 | 16  | 353     | 25.4032 | 25.7658 | 22.6316 | 23.1989 | 23.6117 | 25.4332 | 25.1656 | 25.4255 |
|                        | Q9ISU0 | PA0597       | 3    | 36.6   | 24.149 | 35.129   | 2.53E+09 | 43  | 224     | 27.0747 | 26.6779 | 26.014  | 26.8918 | 26.5317 | 26.689  | 26.5262 | 26.955  |
|                        | Q9ISU1 | PA0596       | 13   | 50     | 38.185 | 127.78   | 7.78E+09 | 112 | 338     | 27.0854 | 27.092  | 27.1293 | 27.4319 | 27.2232 | 27.1088 | 27.3256 | 26.9937 |
| aperoene Si-4-phosphat | Q9ISU3 | surA         | 28   | 71.7   | 46.953 | 323.31   | 3.92E+10 | 288 | 417     | 29.3845 | 29.444  | 28.5672 | 29.4552 | 29.5226 | 29.442  | 29.5494 | 29.4393 |
|                        | Q9ISU4 | pdxA1        | 7    | 43     | 34.923 | 46.967   | 9.13E+08 | 40  | 328     | 25.3236 | 25.4265 | 25.5736 | 25.1847 | 24.8648 | 25.4031 | 25.8979 | 25.4795 |
|                        | Q9ISU5 | rsmA         | 7    | 45.5   | 30.058 | 61.528   | 1.84E+09 | 54  | 268     | 26.0928 | 26.0087 | 26.1609 | 26.1005 | 25.8885 | 26.3579 | 26.3285 | 26.3116 |
|                        | Q9ISU6 | apaG         | 3    | 48.4   | 13.622 | 51.355   | 2.19E+09 | 32  | 126     | 27.993  | 27.2791 | 26.738  | 27.9811 | 27.9372 | 27.4968 | 27.3626 | 27.9161 |
| rotein apA-traphosph   | Q9ISU7 | apaH         | 14   | 61.8   | 32.018 | 61.108   | 1.83E+09 | 64  | 283     | 25.7243 | 25.9207 | 25.876  | 25.7179 | 25.7571 | 25.6452 | 25.7518 | 25.7096 |
|                        | Q9ISV3 | cca          | 10   | 36.1   | 45.639 | 58.179   | 4.41E+08 | 41  | 410     | 24.3976 | 24.211  | 24.5281 | 24.7035 | 23.9086 | 23.7382 | 24.0386 | 23.9612 |
| A-adding e             | Q9ISV4 | PA0583       | 7    | 53.3   | 20.091 | 30.596   | 3.97E+08 | 19  | 180     | 24.2392 | 23.8186 | 23.8908 | 24.5364 | 23.2581 | 24.559  | 22.8166 | 24.3455 |
|                        | Q9ISV7 | tsaD         | 6    | 28.7   | 36.561 | 40.475   | 5.52E+08 | 28  | 341     | 24.2636 | 24.6684 | 24.3018 | 24.2801 | 24.715  | 24.7058 | 24.9475 | 24.7853 |
| threonylcaisomal pro   | Q9ISV8 | rpsU         | 6    | 46.5   | 8.4848 | 48.034   | 1.71E+10 | 83  | 71      | 29.1701 | 29.5367 | 28.8689 | 29.5754 | 30.1347 | 29.8021 | 29.5643 | 29.9246 |
|                        | Q9ISV9 | PA0578       | 3    | 22.8   | 16.842 | 20.136   | 8.68E+08 | 23  | 149     | 25.4743 | 25.9632 | 24.7388 | 25.6038 | 25.9275 | 25.8397 | 25.9801 | 25.8    |
| nA primas              | Q9ISW0 | dnaG         | 8    | 19.6   | 74.175 | 25.353   | 1.29E+08 | 20  | 664     | 22.5641 | 23.7606 | 23.8966 | 22.353  | 23.929  | 24.0199 | 23.8631 | 23.4807 |
|                        | Q9ISX4 | PA0562       | 8    | 45.5   | 24.232 | 97.125   | 1.66E+09 | 56  | 224     | 25.8426 | 25.9703 | 25.9217 | 25.6896 | 26.0551 | 25.8671 | 26.0177 | 25.7664 |
|                        | Q9ISX7 | PA0559       | 7    | 21.4   | 42.618 | 35.682   | 9.37E+08 | 37  | 392     | 25.1952 | 25.2128 | 25.1439 | 25.4514 | 25.5251 | 25.2247 | 25.4015 | 25.0739 |
| isphosphatoglycerate   | Q9ISY1 | fba          | 24   | 64.7   | 38.573 | 323.31   | 8.36E+10 | 323 | 354     | 30.4805 | 30.7633 | 30.6889 | 30.3853 | 30.7102 | 30.8141 | 30.772  | 30.6466 |
|                        | Q9ISY4 | pgk          | 20   | 69.3   | 40.404 | 278.67   | 6.49E+10 | 258 | 387     | 29.6175 | 29.7232 | 29.8875 | 29.6972 | 30.0733 | 30.0287 | 30.1822 | 29.895  |
|                        | Q9ISY5 | epd          | 11   | 67     | 38.743 | 139.42   | 1.97E+09 | 62  | 353     | 25.8173 | 25.6735 | 25.63   | 25.8016 | 26.2859 | 26.2606 | 26.5172 | 26.1647 |
|                        | Q9ISY6 | pyruvate     | 11   | 67     | 29.834 | 54.922   | 9.04E+08 | 40  | 265     | 24.9108 | 24.9344 | 24.9048 | 24.9071 | 24.8367 | 24.6216 | 24.6889 | 24.6121 |
| ranksketol             | Q9ISY8 | tkdA         | 35   | 73.1   | 72.219 | 323.31   | 1.12E+10 | 262 | 665     | 27.7123 | 27.9528 | 27.2295 | 28.3417 | 28.5504 | 28.4608 | 28.1385 | 28.3515 |
|                        | Q9ISZ0 | metK         | 27   | 85.4   | 42.709 | 299.53   | 1.15E+11 | 361 | 396     | 30.9925 | 31.01   | 31.082  | 30.8672 | 31.1995 | 31.1226 | 31.0723 | 30.9536 |
| methionin              | Q9ISZ4 | PA0542       | 4    | 23     | 14.767 | 85.396   | 4.72E+09 | 37  | 139     | 27.9586 | 28.464  | 28.8915 | 28.2546 | 28.0576 | 27.5297 | 28.5342 | 28.542  |
|                        | Q9I610 | 8,9,PA4199,f | 13   | 34.6   | 63.628 | 48.913   | 2.19E+09 | 66  | 592     | 26.2556 | 26.3857 | 25.981  | 26.1987 | 26.2988 | 26.2531 | 26.3783 | 25.9484 |
|                        | Q9I612 | PA0506       | 23   | 50.7   | 65.358 | 219.55   | 9.06E+09 | 140 | 601     | 28.1562 | 28.1567 | 27.7983 | 27.9482 | 27.967  | 28.0016 | 27.8789 | 28.0353 |
| ethiobiotri            | Q9I614 | bioD         | 4    | 28.9   | 23.337 | 23.965   | 5.39E+08 | 25  | 228     | 25.6994 | 25.589  | 25.2681 | 25.307  | 25.4918 | 25.6802 | 25.2259 | 25.5334 |
|                        | Q9I616 | PA0502       | 5    | 26.4   | 26.949 | 53.148   | 6.91E+08 | 28  | 240     | 25.4377 | 24.3916 | 24.8204 | 25.0895 | 25.2224 | 25.0725 | 24.588  | 24.871  |
| xononano               | Q9I617 | bioF         | 10   | 50.6   | 42.237 | 68.691   | 4.96E+08 | 36  | 401     | 24.9458 | 23.5966 | 24.3677 | 24.8134 | 24.6169 | 24.7409 | 24.6488 | 25.2326 |
|                        | Q9I618 | bioB         | 21   | 71.3   | 39.113 | 270.04   | 1.17E+10 | 167 | 352     | 27.9853 | 28.0508 | 28.1502 | 28.0292 | 28.5399 | 28.3476 | 28.4956 | 28.3669 |
| ctin syntha            | Q9I622 | PA0496       | 12   | 59.7   | 34.635 | 143.3    | 2.03E+09 | 68  | 325     | 25.75   | 25.7871 | 26.4475 | 25.4042 | 25.2281 | 25.0312 | 25.5542 | 25.2141 |
|                        | Q9I623 | PA0495       | 3    | 18.5   | 32.951 | 15.295   | 3.43E+08 | 15  | 292     | 23.8993 | 24.9864 | 25.1751 | 24.3635 | 22.1316 | 22.7538 | 24.8713 | 24.8713 |
| I1 protein i           | Q9I624 | PA0494       | 10   | 40.8   | 50.07  | 46.89    | 3.31E+08 | 35  | 458     | 23.3295 | 24.0817 | 25.0819 | 22.3689 | 24.0172 | 24.0949 | 23.5677 | 23.8214 |
|                        | Q9I626 | PA0492       | 8    | 50     | 27.559 | 36.002   | 7.7E+08  | 47  | 252     | 25.0646 | 24.9575 | 25.0655 | 24.8615 | 25.1128 | 24.8032 | 25.145  | 24.648  |
| ate syntha:            | Q9I631 | PA0487       | 6    | 29.4   | 26.948 | 29.108   | 7.28E+08 | 25  | 252     | 25.2899 | 25.3045 | 25.8382 | 25.5514 | 24.855  | 25.2617 | 25.3354 | 25.3065 |
|                        | Q9I632 | PA0486       | 3    | 16     | 36.968 | 16.574   | 1.91E+08 | 17  | 324     | 24.0603 | 23.7203 | 23.832  | 23.7654 | 23.6749 | 23.8502 | 23.9296 | 24.0529 |
| glcB                   | Q9I636 | glcB         | 31   | 64.4   | 78.659 | 323.31   | 3.16E+10 | 261 | 725     | 29.3333 | 29.4352 | 29.5647 | 29.296  | 29.5737 | 29.4084 | 29.4751 | 29.2839 |
|                        | Q9I645 | PA0473       | 6    | 39     | 28.326 | 27.539   | 7.54E+08 | 29  | 249     | 25.6699 | 25.9871 | 25.9129 | 25.6929 | 25.842  | 25.9633 | 25.8549 | 25.6548 |
| Q9I649                 | PA0469 | 19           | 68.4 | 32.137 | 224.26 | 4.65E+09 | 107      | 285 | 26.4297 | 26.5332 | 26.7242 | 26.3961 | 26.0401 | 26.0596 | 26.3013 | 25.9234 |         |
|                        | Q9I650 | PA0468       | 9    | 53.8   | 33.594 | 121.29   | 2.65E+09 | 71  | 316     | 26.5244 | 26.1227 | 25.6672 | 26.7849 | 25.666  | 25.7414 | 25.2484 | 26.0738 |
| Q9I651                 | PA0467 | 9            | 61.2 | 23.301 | 64.532 | 9.39E+08 | 38       | 206 | 25.3171 | 25.5838 | 25.3304 | 25.6474 | 25.5463 | 25.3695 | 25.2422 | 25.2407 |         |
|                        | Q9I655 | creB         | 7    | 38.9   | 25.573 | 61.837   | 7.43E+08 | 30  | 229     | 25.2341 | 25.3756 | 25.4581 | 25.329  | 24.9867 | 25.1372 | 25.0354 | 25.9038 |
| Q9I656                 | PA0462 | 5            | 21.8 | 26.262 | 15.538 | 9.71E+08 | 19       | 234 | 23.2085 | 25.9894 | 25.748  | 25.8279 | 26.6683 | 26.0499 | 26.6808 | 26.2991 |         |
|                        | Q9I658 | PA0460       | 8    | 77.6   | 18.727 | 69.193   | 1.14E+10 | 80  | 192     | 28.7929 | 27.7093 | 27.2045 | 28.1478 | 29.3726 | 28.6938 | 28.9425 |         |
| Q9I662                 | PA0456 | 7            | 82.6 | 7.7066 | 82.635 | 2.36E+11 | 100      | 69  | 34.6019 | 34.1945 | 33.1272 | 34.57   | 34.0861 | 34.3375 | 34.2926 | 34.167  |         |
|                        | Q9I663 | dbpA         | 6    | 24     | 49.784 | 30.143   | 3.27E+08 | 19  | 458     | 24.7385 | 24.3657 | 24.5446 | 24.1192 | 23.9379 | 22.4701 | 23.9501 |         |
| yIhomocys              | Q9I685 | ahcY         | 35   | 80.6   | 51.399 | 323.31   | 9.56E+10 | 390 | 469     | 30.4843 | 30.6287 | 30.6476 | 30.3925 | 30.3453 | 30.4495 | 30.4996 | 30.4124 |
|                        | Q9I686 | PA0431       | 5    | 63.6   | 20.639 | 16.905   | 4.74E+08 | 36  | 184     | 24.8322 | 24.631  | 23.9072 | 25.0595 | 25.1711 | 24.9477 | 24.6649 | 24.9196 |
| rahydrofol             | Q9I687 | metF         | 16   | 66.6   | 32.228 | 132      | 1.52E+10 | 142 | 290     | 28.9474 | 29.0653 | 29.0519 | 28.8248 | 28.7964 | 28.9832 | 28.8641 | 28.7722 |
|                        | Q9I689 | rhlE         | 26   | 49.9   | 70.111 | 220.45   | 6.77E+09 | 166 | 639     | 26.6285 | 27.1533 | 26.4339 | 27.155  | 27.3776 | 27.081  | 26.8627 | 27.3612 |
| N(7)-)-met             | Q9I692 | PA0421       | 26   | 63.1   | 54.207 | 285.88   | 6.48E+09 | 155 | 496     | 27.1694 | 27.3133 | 27.4701 | 27.1297 | 27.1251 | 27.2311 | 27.2752 | 27.2587 |
|                        | Q9I693 | bioA         | 19   | 59.3   | 52.477 | 83.102   | 2.31E+09 | 90  | 467     | 26.2009 | 26.2426 | 26.0621 | 26.179  | 25.7187 | 25.6037 | 25.6167 | 25.6967 |
| no-7-oxoni             | Q9I694 | PA0419       | 6    | 42.1   | 26.468 | 108.57   | 2.26E+09 | 51  | 240     | 27.0447 | 27.1152 | 27.0057 | 26.9796 | 26.9283 | 27.0199 | 26.7948 | 26.9378 |
|                        | Q9I695 | PA0418       | 7    | 25.1   | 52.172 | 23.636   |          |     |         |         |         |         |         |         |         |         |         |

|              |        |        |    |      |        |        |          |     |     |         |         |         |         |         |         |         |         |
|--------------|--------|--------|----|------|--------|--------|----------|-----|-----|---------|---------|---------|---------|---------|---------|---------|---------|
|              | Q9I777 | PA0055 | 5  | 44.6 | 18.433 | 56.346 | 1.84E+09 | 38  | 168 | 25.9139 | 26.2003 | 26.4769 | 26.4108 | 26.0687 | 25.5993 | 25.8459 | 25.5812 |
|              | Q9I793 | PA0039 | 5  | 52   | 7.9233 | 15.099 | 1.18E+09 | 21  | 75  | 27.1886 | 24.7741 | 22.441  | 27.0389 | 23.2179 | 26.6051 | 23.8016 | 26.0596 |
| bamoyl-AH    | Q9I7A5 | tsaC   | 6  | 58.9 | 20.371 | 75     | 8.24E+08 | 30  | 185 | 25.1804 | 25.1025 | 25.2122 | 25.1521 | 24.8303 | 25.319  | 25.1165 | 24.7405 |
|              | Q9I7A7 | PA0020 | 12 | 52.2 | 37.586 | 151.99 | 5.94E+09 | 69  | 341 | 27.6214 | 27.6424 | 27.8749 | 27.4849 | 26.9802 | 26.863  | 27.0621 | 27.3852 |
| de deform    | Q9I7A8 | def    | 10 | 86.9 | 19.365 | 135.45 | 9.46E+09 | 121 | 168 | 27.9725 | 28.0161 | 27.7762 | 28.0861 | 27.5284 | 27.5928 | 27.6581 | 27.4052 |
|              | Q9I7B0 | trkA   | 13 | 45.7 | 49.926 | 64.181 | 1.45E+09 | 56  | 457 | 25.6637 | 25.6492 | 25.9374 | 25.0927 | 25.4329 | 25.5473 | 25.7747 | 25.7818 |
| 4A ligase al | Q9I7B7 | glyQ   | 9  | 47.3 | 36.14  | 104.53 | 8.94E+09 | 81  | 315 | 28.6488 | 28.4745 | 28.0671 | 28.8089 | 29.009  | 28.7784 | 28.2638 | 28.178  |
| NA ligase b  | Q9I7B8 | glyS   | 31 | 50   | 73.973 | 314.82 | 9.54E+09 | 206 | 684 | 26.9537 | 26.9435 | 27.0282 | 26.7406 | 26.891  | 27.0431 | 27.0938 | 27.3102 |
| ptose-1,7-i  | Q9I7C0 | gmhB   | 6  | 54.5 | 19.115 | 58.057 | 3.74E+09 | 52  | 178 | 28.1234 | 28.2345 | 27.4334 | 28.337  | 28.122  | 28.3798 | 27.8591 | 28.285  |
| γrase subr   | Q9I7C2 | gyrB   | 36 | 61.9 | 90.188 | 255.39 | 8.55E+09 | 197 | 806 | 27.1171 | 27.4305 | 26.8451 | 27.2076 | 27.6822 | 27.5334 | 27.2535 | 28.087  |
| erage III su | Q9I7C4 | dnaN   | 17 | 54   | 40.694 | 323.01 | 4.15E+10 | 188 | 367 | 29.9261 | 30.0943 | 30.3271 | 29.8024 | 29.8841 | 29.9323 | 30.1214 | 29.861  |
| ication init | Q9I7C5 | dnaA   | 21 | 59.1 | 57.754 | 152.48 | 3.33E+09 | 100 | 514 | 25.9654 | 26.1182 | 26.054  | 25.9588 | 26.1603 | 26.186  | 26.1044 | 26.3383 |
| 5-phosphat   | Q9KGU6 | dxr    | 15 | 54.8 | 42.508 | 149.97 | 2.17E+09 | 68  | 396 | 26.1922 | 26.0069 | 26.0723 | 26.0411 | 26.4133 | 26.4887 | 26.4005 | 26.3649 |
| ose-5-phor   | Q9KGU7 | dxs    | 17 | 33.3 | 68.049 | 88.225 | 1.64E+09 | 72  | 627 | 25.7329 | 25.8707 | 25.5501 | 25.5206 | 25.871  | 26.1685 | 25.936  | 26.3196 |
| nslocase su  | Q9LCT3 | secA   | 41 | 57   | 103.85 | 323.31 | 2.28E+10 | 356 | 916 | 28.3758 | 28.5279 | 28.5871 | 28.41   | 28.8102 | 28.8357 | 28.8671 | 29.0657 |
| l-D-alanin   | Q9LCT6 | ddlB   | 14 | 61.4 | 34.363 | 109.23 | 5.04E+09 | 104 | 319 | 26.9503 | 27.0276 | 27.0785 | 27.016  | 26.988  | 27.2589 | 27.3297 | 27.2903 |
| colate phc   | Q95586 | gph1   | 5  | 32.4 | 29.812 | 12.379 | 3.74E+08 | 17  | 272 | 24.3106 | 23.9755 | 24.1717 | 24.176  | 24.7531 | 24.8347 | 24.3834 | 24.8992 |
| ogluconol    | Q9K2N2 | pgl    | 9  | 48.3 | 25.571 | 80.76  | 1.25E+09 | 44  | 238 | 25.3603 | 25.1244 | 24.9394 | 25.2435 | 25.3502 | 25.4189 | 25.5306 | 25.32   |
| lthioredoxi  | Q9K2T1 | trxA   | 8  | 74.1 | 11.87  | 82.25  | 1.03E+11 | 174 | 108 | 32.5341 | 31.5223 | 30.8505 | 32.7362 | 31.5396 | 32.3863 | 31.5319 | 32.1547 |
| P-N-acetyl   | Q9X6P4 | lpxA   | 10 | 52.3 | 28.009 | 52.269 | 3.51E+09 | 60  | 258 | 27.1533 | 27.2629 | 27.2575 | 26.9702 | 27.3176 | 27.3113 | 27.2687 | 27.0865 |
| ninopropyl   | Q9X6R0 | speE1  | 16 | 64.7 | 32.238 | 106.89 | 6.78E+09 | 101 | 286 | 27.4346 | 27.7155 | 27.535  | 27.2248 | 27.5844 | 27.6482 | 27.7621 | 28.0246 |
| 3D protein i | Q9X6V8 | PA3998 | 6  | 82.8 | 10.338 | 101.17 | 5.19E+09 | 56  | 93  | 27.7737 | 27.2087 | 27.1685 | 27.6667 | 27.6378 | 27.4569 | 27.5957 | 27.6542 |
| noyltransfr  | Q9X6V9 | lipB   | 8  | 73.3 | 23.856 | 33.215 | 9.58E+08 | 34  | 217 | 25.3359 | 25.0525 | 25.4787 | 23.1592 | 25.5247 | 25.2813 | 25.7854 | 25.7687 |
| nate-tRNA    | Q9XCL6 | glxX   | 27 | 70.6 | 56.749 | 197.49 | 1.29E+10 | 218 | 494 | 27.5661 | 27.7968 | 27.2295 | 28.0505 | 28.2287 | 28.0898 | 27.8949 | 28.1813 |
| GTPase Era   | Q9XCX8 | era    | 17 | 64.3 | 34.549 | 95.359 | 7.8E+09  | 92  | 305 | 28.1332 | 28.2931 | 28.3282 | 28.1819 | 27.8055 | 28.0692 | 27.9389 | 27.9833 |
| bonuclease   | Q9XCX9 | rnc    | 10 | 43.7 | 25.506 | 39.538 | 2.42E+09 | 60  | 229 | 26.1629 | 26.1391 | 26.4527 | 26.2062 | 26.2334 | 26.135  | 26.1119 | 25.8564 |
| rotein] rec  | Q9ZFE4 | fabl   | 12 | 63   | 28.006 | 71.88  | 2.03E+09 | 56  | 265 | 25.5828 | 25.8858 | 25.9854 | 25.4195 | 26.2178 | 26.0101 | 25.9326 | 25.454  |
| gphospho     | Q9ZFK4 | kdsA   | 19 | 75.1 | 31.143 | 97.321 | 1.45E+10 | 151 | 281 | 28.1427 | 28.2784 | 28.3899 | 28.0465 | 28.1441 | 28.3256 | 28.1825 | 28.1627 |
